# Supplementary material for: Cognitive function in idiopathic intracranial hypertension: a prospective case–control study
Source: PubMed Central journal article supplement — BMJ Open. 2014 Apr 8;4(4):e004376. doi: 10.1136/bmjopen-2013-004376 (PMC3987738; doi:10.1136/bmjopen-2013-004376), 2014-04-08
Supplement: bmjopen-2013-004376.draft_revisions.pdf [file bmjopen-2013-004376.draft_revisions.pdf]

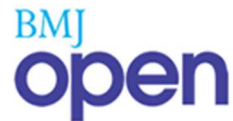

**Idiopathic intracranial hypertension is associated with cognitive dysfunction — a prospective case-control study**

|                                 |                                                                                                                                                                                                                                                                                                                                                                                                                                                        |
|---------------------------------|--------------------------------------------------------------------------------------------------------------------------------------------------------------------------------------------------------------------------------------------------------------------------------------------------------------------------------------------------------------------------------------------------------------------------------------------------------|
| Journal:                        | <i>BMJ Open</i>                                                                                                                                                                                                                                                                                                                                                                                                                                        |
| Manuscript ID:                  | bmjopen-2013-004376                                                                                                                                                                                                                                                                                                                                                                                                                                    |
| Article Type:                   | Research                                                                                                                                                                                                                                                                                                                                                                                                                                               |
| Date Submitted by the Author:   | 31-Oct-2013                                                                                                                                                                                                                                                                                                                                                                                                                                            |
| Complete List of Authors:       | Yri, Hanne; Danish Headache Centre, Department of Neurology, Glostrup Hospital, University of Copenhagen<br>Fagerlund, Birgitte; Center for Neuropsychiatric Schizophrenia Research, Psychiatric Center Glostrup, University of Copenhagen<br>Forchhammer, Hysse; Department of Neurology, Glostrup Hospital, University of Copenhagen<br>Jensen, Rigmor; Danish Headache Centre, Department of Neurology, Glostrup Hospital, University of Copenhagen |
| <b>Primary Subject Heading</b>: | Neurology                                                                                                                                                                                                                                                                                                                                                                                                                                              |
| Secondary Subject Heading:      | Neurology                                                                                                                                                                                                                                                                                                                                                                                                                                              |
| Keywords:                       | MENTAL HEALTH, Adult neurology < NEUROLOGY, Neuro-ophthalmology < NEUROLOGY                                                                                                                                                                                                                                                                                                                                                                            |
|                                 |                                                                                                                                                                                                                                                                                                                                                                                                                                                        |

SCHOLARONE™  
Manuscripts

1  
2  
3  
4 Idiopathic intracranial hypertension is associated with cognitive  
5  
6  
7 dysfunction — a prospective case-control study  
8  
9

10 Hanne Maria Yri MD<sup>1</sup>, Birgitte Fagerlund MA, PhD<sup>2</sup>, Hysse Birgitte Forchhammer MA, PhD<sup>3</sup>,  
11 Rigmor Højland Jensen MD, Dr Med Sci<sup>1</sup>  
12  
13

- 14  
15 1. Danish Headache Center, Department of Neurology, Glostrup Hospital, University of  
16 Copenhagen, Denmark.  
17  
18 2. Center for Neuropsychiatric Schizophrenia Research, Psychiatric Center Glostrup, University  
19 of Copenhagen, Denmark  
20  
21 3. Department of Neurology, Glostrup Hospital, University of Copenhagen, Denmark  
22  
23  
24

25  
26 **CORRESPONDING AUTHOR**

27 Rigmor Højland Jensen, Danish Headache Center, Department of Neurology, Glostrup Hospital,  
28 Ndr. Ringvej 69, 2600 Glostrup, Denmark. E-mail: rigmor.jensen@regionh.dk.  
29  
30 Telephone: +45 38 63 30 59. Fax: +45 38 63 30 71  
31  
32  
33  
34  
35

36  
37 **KEY WORDS**

38 Idiopathic intracranial hypertension, pseudotumor cerebri, cognition disorders, case-control studies.  
39  
40  
41  
42

43 **WORD COUNT:** 2810

44  
45 **NUMBER OF REFERENCES:** 32  
46  
47  
48  
49  
50  
51  
52  
53  
54  
55  
56  
57  
58  
59  
60

## ABSTRACT

**Objective:** To explore the extent and nature of cognitive deficits in patients with idiopathic intracranial hypertension at time of diagnosis and after three months of treatment.

**Design:** Prospective case-control study.

**Setting:** Neurological department, ophthalmological department and a tertiary headache referral clinic at a Danish university hospital.

**Participants:** Thirty-one patients with definite idiopathic intracranial hypertension referred from June 2011– February 2013 and included within one week of diagnostic intracranial pressure measurement. Twenty-nine patients completed re-examined at the 3-month follow-up. At time of testing none of the patients took medication potentially affecting cognitive function. Controls were 31 healthy age- and sex-matched volunteers from the local community.

**Outcome measures:** Executive function, working memory, visuospatial memory, processing speed, attention, and reaction time assessed by a comprehensive neuropsychological test battery consisting of validated computerized (Cambridge Neuropsychological Test Automated Battery (CANTAB)) and paper-and-pencil tests.

**Results:** Patients with idiopathic intracranial hypertension performed significantly worse than controls in four of six cognitive domains ( $p \leq .02$ ). Deficits were most pronounced in reaction time (1.45 SD below controls 95% CI 2.10 to 0.85) and processing speed (1.45 SD below controls 95% CI 2.08 to 0.81). Despite marked improvement in intracranial pressure and headache, re-examination showed persistent cognitive dysfunction three months after diagnosis and start of treatment.

**Conclusions:** We demonstrate for the first time in a well-defined cohort of patients that Idiopathic intracranial hypertension may be associated with cognitive dysfunction. This may explain the functional disability of patients with Idiopathic intracranial hypertension. A focused

1  
2  
3  
4 multidisciplinary approach including neuropsychological rehabilitation therefore might be relevant in  
5  
6 the treatment of patients with IHH.  
7  
8  
9

## 10 11 **ARTICLE SUMMARY**

### 12 13 **Strengths and limitations of this study**

- 14  
15 • The first study to assess a broad range of cognitive functions in more than 10 patients
- 16  
17 • Prospective controlled design and a well defined study population
- 18  
19 • Controls were matched for age, sex and premorbid intelligence
- 20  
21 • The study was non-blinded and controls were not matched for Body Masse Index (BMI)
- 22  
23 • Cognitive assessment by an automated computerized test battery reduced the influence of the
- 24  
25 non-blinded observer
- 26  
27  
28  
29  
30  
31  
32  
33  
34  
35  
36  
37  
38  
39  
40  
41  
42  
43  
44  
45  
46  
47  
48  
49  
50  
51  
52  
53  
54  
55  
56  
57  
58  
59  
60

## INTRODUCTION

Idiopathic intracranial hypertension (IIH) is characterized by raised intracranial pressure (ICP) without an identifiable cause primarily affecting young obese women. The estimated incidence in the obese population is 20 per 100,000 which is 20-fold the incidence in normal-weight individuals.[1;2] Prevalence is predicted to rise in the wake of the global obesity epidemic.[3] Due to predilection for young individuals of working age the socioeconomic consequences of IIH are substantial. In USA alone the estimated annual costs exceed \$444 million (> \$17,000 /patient).[4] In addition to direct medical cost the major expenses was loss of wages caused by patients having to give up work or change profession due to IIH. Loss of income due to IIH is reported by 48% of patients,[4] but the exact cause of this substantial disability is yet unknown. Despite the obvious threat to visual function, compliance with long-term treatment is surprisingly poor. In clinical settings we experience substantial lack of initiative and self-care which could indicate prefrontal dysfunction. While numerous studies describe the visual and headache-related complications of IIH, very little is known about the cognitive implications of the disease and their socioeconomic consequences.[5-8] The aim of this case-control study is to prospectively explore the extent and nature of cognitive deficits at time of IIH-diagnosis and after three months of treatment.

## METHODS

### Subjects

We recruited 31 consecutive patients with IIH referred to the Department of Neuro-Ophthalmology, the Department of Neurology or the Danish Headache Center, Glostrup Hospital from June 2011–

1  
2  
3  
4 February 2013. Sample size was determined by the number of cases referred in the inclusion period.  
5  
6 Twenty-eight of the patients were newly diagnosed with IHH, three patients had well-defined relapse  
7  
8 of IHH after a minimum of 10 months (range 10-26 months) of medication-free remission (resolved  
9  
10 headache and papilledema). All patients had definite IHH according to the diagnostic criteria.[9;10]  
11  
12 We included only patients that could be tested within seven days of confirmed diagnosis. Exclusion  
13  
14 criteria were: other disorders or medication that could potentially affect cognition, decreased visual  
15  
16 acuity, or language skills (Danish) deemed insufficient for participation in the cognitive assessment.  
17  
18 Thirty-one healthy and headache free (defined as less than 4 headache days/month) controls,  
19  
20 matched for age and sex, were recruited by advertising at Glostrup Hospital and on the website  
21  
22 forsogspersonen.dk. Healthy controls were tested only once and did not have a lumbar puncture  
23  
24 performed. Otherwise the cognitive examination program for patients and controls was identical.  
25  
26  
27  
28  
29

### 30 31 **Standard protocol approvals, registration and patients consents**

32  
33 All participants gave written, informed consent to participate in the study. The study was conducted  
34  
35 in accordance with the declaration of Helsinki and approved by the Regional Ethics Committee.  
36  
37  
38  
39

### 40 41 **General examination**

42  
43 At time of diagnosis patients underwent a complete neurological examination including MR/CT-  
44  
45 imaging with venous sequences. All but one patient underwent thorough standardized neuro-  
46  
47 ophthalmological examination.[11] The remaining patient did not participate in the neuro-  
48  
49 ophthalmological evaluation in spite of numerous invitations. A general ophthalmological  
50  
51 examination was, however, performed at the local referring ophthalmological department.  
52  
53  
54  
55  
56  
57  
58  
59  
60

## Treatment

After diagnostic lumbar puncture and after cognitive testing was completed, treatment with acetazolamide was initiated. From baseline to 3-month follow-up doses were individually adjusted at doses of 750-2225 mg/day. Due to intolerable side effects acetazolamide was replaced by topiramate, 125 mg/day in one patient. Treatment with acetazolamide and topiramate was paused respectively three and seven days before the 3-month follow-up examinations.

Infrequent (<14 days/month) use of simple analgesics (paracetamol and/or acetylsalicylic acid) was allowed. Treatment did not include use of opiate analgesics or tranquilizers.

Weight-loss was strongly recommended and patients were offered dietician consultations.

## ICP

ICP was measured at baseline and at the 3-month follow-up. In one patient ICP was measured by direct intracranial pressure monitoring. In the remaining patients (n=30) ICP was measured by standardized lumbar puncture manometry. Patients were placed in lateral decubital position, had their legs straightened and were given a minimum of 10 min to relax before a stabilized pressure was recorded.

## Cognitive testing

We assessed cognitive function by a neuropsychological test battery of validated computerized (Cambridge Neuropsychological Test Automated Battery (CANTAB))[12] and paper-and-pencil tests.

Paper-and-pencil tests: (a) **Rey – Osterreith's Complex Figure Test**, testing visuospatial memory; (b) **Trail Making Test A and B**, primarily testing psychomotor speed; (c) **Symbol Digit Modalities Test**, testing psychomotor speed; (d) **Verbal Fluency Test**, testing verbal semantic and phonological

1  
2  
3  
4 fluency. The letters “S” and “A” and the categories “animals” and “items in a supermarket” were  
5  
6 used.

7  
8 CANTAB computerized tests: (e) **Motor screening test** to familiarize subjects with the touch screen;  
9  
10 (f) **Spatial Span**, assessing visuospatial working memory span; (g) **Spatial Working Memory**,  
11  
12 testing the ability to retain and manipulate spatial information in working memory; (h) **Stockings of**  
13  
14 **Cambridge**, assessing spatial planning ability; (i) **Intra-Extra Dimensional Set Shift**, testing  
15  
16 cognitive flexibility, requiring the formation and shifting of attentional set; (j) **Reaction Time**,  
17  
18 assessing motor and reaction time latencies; (k) **Rapid Visual Information Processing**, testing  
19  
20 sustained attention with a working memory load.  
21  
22

23  
24 The **Danish Adult Reading Test** (Danish version of the National Adult Reading Test) was applied  
25  
26 as an estimate of premorbid intelligence.[13]  
27

28  
29 The test battery was administered in a fixed order by the same physician (HY), instructed and trained  
30  
31 by experienced neuro-psychologists (HF, BF). To ensure uniform test instructions we used a written  
32  
33 instruction-manual during all sessions. Headache intensity at time of testing was recorded by a 10-  
34  
35 point Visual Analogue Scale (VAS). Patients were re-tested at the 3-month follow-up.  
36  
37

### 38 39 **Statistical analysis**

40  
41 Statistical analyses were conducted using SAS 9.3. Significance levels were set at 0.05. Non-normal  
42  
43 distributed data were logarithmically transformed to reduce skewness. Categorical data were  
44  
45 investigated by Chi-square test, Fishers’ exact test and McNemar test.  
46  
47

48  
49 Test-scores of patients and healthy controls were compared using a linear mixed model adjusting for  
50  
51 education and headache at time of testing. Changes in patient test-scores from baseline to follow-up  
52  
53 were analyzed in a linear mixed model for paired data adjusting for headache at time of testing. Test  
54  
55 performance in patients with normalized ICP at follow-up and patient with continuous elevated ICP  
56  
57  
58  
59  
60



1  
2  
3  
4 was compared in a mixed model using ICP  $\leq 25$  cmH<sub>2</sub>O and ICP  $< 25$  cmH<sub>2</sub>O as a binary categorical  
5  
6 variable. To avoid effects of multiple comparisons in the analyses of cognitive function, the analyses  
7  
8 were performed in mixed linear models including all 19 subtest scores into the same model.  
9

10 For comparability of test-scores and evaluation of effect sizes, test-scores were standardized into z-  
11  
12 scores. Z-scores were based on performance of the healthy controls which by definition had a mean  
13  
14 scale score of zero and SD set to one. All scales were computed so that a higher z-score indicate  
15  
16 better performance.  
17

18  
19 We used standardized test-scores to create composite domain scores, calculated by grouping selected  
20  
21 tests, based on which cognitive domain they theoretically represented. Z-scores for cognitive  
22  
23 domains were averaged and re-standardized based on the composite domain average and standard  
24  
25 deviation of healthy controls.  
26  
27

28 Although they spoke Danish fluently, Trail Making Test scores and Verbal Fluency scores from non-  
29  
30 native Danish speakers (n=2) were omitted from statistical analysis as these test are potentially  
31  
32 influenced by language-fluency and familiarity with the Latin alphabet. In domain construction the  
33  
34 average of the remaining tests was used to determine the domain score.  
35  
36  
37  
38

## 39 RESULTS

### 40 Demographics and clinical characteristics at baseline

41  
42 Patients and healthy controls did not differ in demographics, household income, educational level or  
43  
44 premorbid intelligence level (Table 1). However, patient had significantly higher BMI and slightly  
45  
46 less education counted in years than healthy controls.  
47  
48

49  
50 Headache at the time of testing was reported by the majority of patients, but by none of the controls  
51  
52 (Table 1). General headache disability in patients was heterogeneous. Nine patients fulfilled the  
53  
54 criteria of chronic headache ( $\geq 15$  days/month for 3 months)[10], four patients had frequent headache  
55  
56  
57  
58  
59  
60

1  
2  
3  
4 (mean 7.7 days/month)[10], seven had infrequent headache (<1 day /month)[10], 14 had only had  
5  
6 headache in the weeks up until diagnosis and four patient had no headache at all. Healthy controls  
7  
8 reported infrequent headaches with a mean frequency at 0.5 days/month.

9  
10 Visual fields (Automated perimetry, Humphrey 30-2) were bilaterally normal in 14 patients and  
11  
12 normal in at least one eye in another eight patients. Seven patients had mild bilateral peripheral  
13  
14 defects. One patient had bilateral concentric defects with remaining 15-20 central degrees of vision.

15  
16  
17 In the cognitive tests this patient performed equally to the average patient. No photophobia or visual  
18  
19 disturbances were reported during testing.

20  
21  
22 Twenty-two patients were on either short term (n=18) or long-term sick-leave (n=4), five were  
23  
24 unemployed and three had retired from work for reasons other than IHH.  
25  
26  
27  
28  
29  
30  
31  
32  
33  
34  
35  
36  
37  
38  
39  
40  
41  
42  
43  
44  
45  
46  
47  
48  
49  
50  
51  
52  
53  
54  
55  
56  
57  
58  
59  
60

**Table 1. Demographics and clinical characteristics for IHH patients at baseline and at follow-up and healthy controls**

|                                                                        | IHH Baseline<br>n=31 | IHH Follow-up<br>n=29 | Controls<br>n=31 | Statistics       |                  |
|------------------------------------------------------------------------|----------------------|-----------------------|------------------|------------------|------------------|
|                                                                        |                      |                       |                  | p <sup>d</sup>   | p <sup>e</sup>   |
| <b>Demographics</b>                                                    |                      |                       |                  |                  |                  |
| Age (SD), <i>years</i>                                                 | 31.0 (11.2)          |                       | 30.7 (11.2)      | 0.91             |                  |
| Gender, <i>m/f</i>                                                     | 31/0                 |                       | 31/0             |                  |                  |
| Danish Adult Reading Test (SD), <i>words</i>                           | 22.9 (6.8)           |                       | 24.8 (5.3)       | 0.15             |                  |
| Education (SD), <i>years</i>                                           | 11.2 (2.2)           |                       | 12.8 (2.1)       | <b>0.001</b>     |                  |
| <u>Educational level</u>                                               |                      |                       |                  |                  | 0.38             |
| Long cycle higher ( $\geq 5$ years), <i>n</i>                          | 0                    |                       | 3                |                  |                  |
| Medium cycle higher (3–5 years), <i>n</i>                              | 4                    |                       | 7                |                  |                  |
| Short cycle higher (<3 years), <i>n</i>                                | 4                    |                       | 4                |                  |                  |
| Vocational upper- secondary, <i>n</i>                                  | 5                    |                       | 3                |                  |                  |
| Student, <i>n</i>                                                      | 10                   |                       | 10               |                  |                  |
| No education, <i>n</i>                                                 | 8                    |                       | 4                |                  |                  |
| <u>Household income</u>                                                |                      |                       |                  |                  | 0.81             |
| High (>DKK 400,000/year), <i>n</i>                                     | 10                   |                       | 8                |                  |                  |
| Middle (DKK 200-400,000/year), <i>n</i>                                | 12                   |                       | 12               |                  |                  |
| Low (<DKK 200,000/year), <i>n</i>                                      | 9                    |                       | 11               |                  |                  |
| <b>Clinical Characteristics</b>                                        |                      |                       |                  |                  |                  |
| BMI (SD), <i>kg/m<sup>2</sup></i>                                      | 35.7 (6.2)           | 34.0 (6.0)            | 23.6 (4.0)       | <b>&lt;0.001</b> | <b>0.009</b>     |
| Headache at time of testing, <i>n (%)</i>                              | 22 (71)              | 14 (48)               | 0                |                  |                  |
| Mean headache intensity (SD), <i>VAS</i>                               | 2.64 (2.3)           | 1.84 (2.4)            |                  |                  | <b>0.01</b>      |
| ICP $\leftrightarrow$ cognitive testing <sup>a</sup> (SD), <i>days</i> | 3 (2.4)              | 1 (1.6)               |                  |                  |                  |
| Mean ICP <sup>b</sup> (SD), <i>cmH<sub>2</sub>O</i>                    | 41.0 (12.6)          | 25.9 (5.5)            |                  |                  | <b>&lt;0.001</b> |
| Memory difficulties <sup>c</sup> , <i>n (%)</i>                        | 17 (55)              | 18 (62)               |                  |                  | 0.42             |

|                                                        |            |         |      |
|--------------------------------------------------------|------------|---------|------|
| Concentration difficulties <sup>c</sup> , <i>n (%)</i> | 20 (65)    | 15 (52) | 0.18 |
| Duration of IHH symptoms (SD), <i>months</i>           | 4.34 (5.4) |         |      |

Chi-square test was used for household income, Fishers' exact test for educational level and McNemars' test for paired categorical variables. 2-tailed T-test was used for numerical variables. Significant p-values are printed in bold. <sup>a</sup>Time-span between ICP measurement and cognitive testing. <sup>b</sup>ICP measured with intracranial pressure monitor (n=1) not included. <sup>c</sup>Subjective difficulties reported by the patients. <sup>p<sup>d</sup></sup>: difference between patients at baseline and healthy controls. <sup>p<sup>e</sup></sup>: difference between patients at baseline and follow-up.

### Cognitive function in patients at baseline compared to healthy controls

IHH-patients performed significantly worse than controls in four of six cognitive domains and in 13 of 19 subtests (Table 2). The most pronounced deficits were found in the domains of processing speed and reaction time (Figure 1). Even though deficits in executive functions only reached trend levels of significance patients scored significantly worse in the subtest measuring cognitive flexibility (ID/ED errors). Likewise, patients performed significantly worse in the subtest measuring spatial working memory strategy although no overall deficits in working memory was found.

**Table 2. Cognitive test scores and composite domain scores at baseline compared to healthy controls**

| Test Variables                              | Raw-scores           |                          | Z-scores and statistics |             |                   |
|---------------------------------------------|----------------------|--------------------------|-------------------------|-------------|-------------------|
|                                             | IIH Baseline<br>n=31 | Healthy Controls<br>n=31 | Z                       | 95% CL      | p                 |
| <b><u>Executive function</u></b>            |                      |                          | -0.61                   | -1.25;0.02  | 0.059             |
| <b>Intra-Extra Dimensional</b>              |                      |                          |                         |             |                   |
| <b>Set Shift</b>                            |                      |                          |                         |             |                   |
| ID/ED Errors <sup>log</sup>                 | 8.1 (0-32)           | 4.0 (0-25)               | -0.94                   | -1.54;-0.35 | <b>0.002</b>      |
| Total errors adjusted <sup>log</sup> , s    | 20.9 (7-177)         | 12.2 (7-55)              | -0.91                   | -1.50;-0.32 | <b>0.003</b>      |
| <b>Stockings of Cambridge</b>               |                      |                          |                         |             |                   |
| Solved in minimum moves                     | 9.61 (2.0)           | 10.19 (1.7)              | -0.28                   | -0.87;0.31  | 0.31              |
| Initial thinking time <sup>log</sup> , s    | 6.5 (2.0-18.3)       | 8.2 (3.1-40.7)           | 0.49                    | -0.11;1.08  | 0.11              |
| Subsequent thinking time <sup>log</sup> , s | 0.013 (0-3.7)        | 0.011 (0-3.0)            | 0.09                    | -0.51;0.68  | 0.77              |
| <b>Trail Making Test<sup>a</sup></b>        |                      |                          |                         |             |                   |
| Trail Making B-A <sup>log</sup> , s         | 39.2 (14.7-101.1)    | 30.62 (16.3-98.4)        | -0.56                   | -1.10;0.09  | 0.07              |
| <b><u>Working memory</u></b>                |                      |                          | -0.56                   | -1.19;0.08  | 0.08              |
| <b>Spatial Working Memory</b>               |                      |                          |                         |             |                   |
| Strategy score <sup>log</sup>               | 29.9 (20-42)         | 24.8 (19-40)             | -0.75                   | -1.35;-0.16 | <b>0.01</b>       |
| Total errors <sup>log</sup>                 | 10.2 (0-79)          | 4.7 (0-70)               | -0.48                   | -1.07;0.12  | 0.11              |
| <b>Spatial Span:</b>                        |                      |                          |                         |             |                   |
| Span length                                 | 6.4 (1.3)            | 7.0 (1.4)                | -0.31                   | -0.90;0.28  | 0.31              |
| <b><u>Processing speed</u></b>              |                      |                          | -1.45                   | -2.08;-0.81 | <b>&lt;0.0001</b> |
| <b>Verbal Fluency<sup>a</sup></b>           |                      |                          |                         |             |                   |
| Letters                                     | 19.4 (7.0)           | 30.3 (8.3)               | -1.25                   | -1.84;-0.65 | <b>&lt;0.0001</b> |
| Categories                                  | 39.8 (9.9)           | 55.5 (12.3)              | -1.21                   | -1.81;-0.61 | <b>&lt;0.0001</b> |

**Trail Making Test<sup>a</sup>**

|                                   |                  |                  |       |             |             |
|-----------------------------------|------------------|------------------|-------|-------------|-------------|
| Trail Making A <sup>log</sup> , s | 31.5 (18.0-68.1) | 25.2 (12.8-51.4) | -0.63 | -1.22;-0.02 | <b>0.04</b> |
|-----------------------------------|------------------|------------------|-------|-------------|-------------|

|                                   |                   |                   |       |             |             |
|-----------------------------------|-------------------|-------------------|-------|-------------|-------------|
| Trail Making B <sup>log</sup> , s | 73.5 (40.9-169.2) | 52.2 (31.2-131.1) | -0.66 | -1.26;-0.07 | <b>0.02</b> |
|-----------------------------------|-------------------|-------------------|-------|-------------|-------------|

**Symbol Digit Modalities**

|                 |             |            |       |             |               |
|-----------------|-------------|------------|-------|-------------|---------------|
| Correct symbols | 47.8 (10.2) | 58.7 (9.0) | -1.09 | -1.68;-0.49 | <b>0.0003</b> |
|-----------------|-------------|------------|-------|-------------|---------------|

**Visuospatial memory**

|  |  |  |       |             |             |
|--|--|--|-------|-------------|-------------|
|  |  |  | -0.74 | -1.32;-0.05 | <b>0.02</b> |
|--|--|--|-------|-------------|-------------|

**Rey-Osterreith Figure**

|                         |            |            |       |             |             |
|-------------------------|------------|------------|-------|-------------|-------------|
| Immediate recall, score | 24.5 (5.4) | 28.0 (4.3) | -0.67 | -1.26;-0.08 | <b>0.03</b> |
|-------------------------|------------|------------|-------|-------------|-------------|

|                       |            |            |       |             |              |
|-----------------------|------------|------------|-------|-------------|--------------|
| Delayed recall, score | 23.8 (5.0) | 28.0 (4.4) | -0.83 | -1.42;-0.24 | <b>0.006</b> |
|-----------------------|------------|------------|-------|-------------|--------------|

**Attention****Rapid Visual Processing**

|                          |           |            |       |             |             |
|--------------------------|-----------|------------|-------|-------------|-------------|
| A' sensitivity to target | 0.9 (0.1) | 0.93 (0.1) | -0.70 | -1.30;-0.11 | <b>0.01</b> |
|--------------------------|-----------|------------|-------|-------------|-------------|

**Reaction time**

|  |  |  |       |             |                   |
|--|--|--|-------|-------------|-------------------|
|  |  |  | -1.48 | -2.10;-0.85 | <b>&lt;0.0001</b> |
|--|--|--|-------|-------------|-------------------|

**Reaction Time:**

|                              |                     |                     |       |             |                   |
|------------------------------|---------------------|---------------------|-------|-------------|-------------------|
| Reaction <sup>log</sup> , ms | 409.4 (264.9-988.6) | 330.0 (247.6-464.1) | -1.81 | -2.40;-1.22 | <b>&lt;0.0001</b> |
|------------------------------|---------------------|---------------------|-------|-------------|-------------------|

|              |              |              |       |             |              |
|--------------|--------------|--------------|-------|-------------|--------------|
| Movement, ms | 417.8 (86.3) | 338.3 (80.1) | -0.84 | -1.43;-0.25 | <b>0.006</b> |
|--------------|--------------|--------------|-------|-------------|--------------|

Normally distributed raw-score variables are shown as mean (SD). Logarithmically transformed variables<sup>log</sup> are shown as arithmetic mean (range). Z-scores and test statistics are given in estimates from a linear mixed model adjusting for education and headache at time of testing and multiple testing. Significant p-values are printed in bold. <sup>a</sup>n=29, as Trail Making Test scores and Verbal Fluency scores from non-native Danish speakers (n=2) were omitted from analysis.

### Clinical characteristics at follow-up

In spite of several invitations to attend a follow-up examination two patients dropped out from baseline to follow-up. Clinical characteristics and baseline test-scores in these 2 patients did not differ from the rest of the patient group.

Twenty-nine patients were reexamined at the 3-month follow-up. One patient refused to have lumbar puncture performed at follow-up. A normalized ICP was found in 14 of the remaining 28 patients.

Less than half of the patients had headache during cognitive re-testing (Table 1). Visual fields were either stable or had improved from baseline.

Fourteen of 31 patients had resumed work/school, 11 patients were now on long-term sick-leave, one patient had reduced and altered work schedule due to IHH, two patients were unemployed.

### Cognitive function at follow-up

After 3-months of treatment statistical significant improvement was detected in two domains (Table 3). Attention scores (RVP A') had practically normalized while performance in visuospatial memory tests improved to a level above performance in healthy controls.

No overall change was detected in the domains of executive function, working memory, processing speed and reaction time (Figure 2). Patients in which ICP had normalized ( $<25$  cmH<sub>2</sub>O) did not perform better than patients in which elevated ICP persisted (ICP $>25$  cmH<sub>2</sub>O) and performance was not significantly associated with intensity or presence/absence of headache during the test.

**Table 3. Cognitive test scores and composite domain scores at follow-up compared to baseline**

| Test Variables                              | Raw-scores        |                 | Z-scores and statistics |             |              |
|---------------------------------------------|-------------------|-----------------|-------------------------|-------------|--------------|
|                                             | IIH Baseline      | IIH Follow-up   | Z <sup>b</sup>          | 95% CL      | p            |
|                                             | n=31              | n=29            |                         |             |              |
| <b><u>Executive function</u></b>            |                   |                 | -0.18                   | -0.77;0.42  | 0.16         |
| <b>Intra-Extra Dimensional</b>              |                   |                 |                         |             |              |
| <b>Set Shift</b>                            |                   |                 |                         |             |              |
| ID/ED Errors <sup>log</sup>                 | 8.1 (0–32)        | 5.8 (1–32)      | -0.82                   | -1.40;-0.25 | 0.77         |
| Total errors adjusted <sup>log</sup> , s    | 20.9 (7–177)      | 14.4 (7–68)     | -0.56                   | -1.14;0.01  | 0.26         |
| <b>Stockings of Cambridge</b>               |                   |                 |                         |             |              |
| Solved in minimum moves                     | 9.61 (2.0)        | 19.9 (2.0)      | -0.08                   | -0.66;0.49  | 0.55         |
| Initial thinking time <sup>log</sup> , s    | 6.5 (2.0–18.3)    | 6.7 (2.5–18.4)  | 0.45                    | -0.14;1.02  | 0.98         |
| Subsequent thinking time <sup>log</sup> , s | 0.013 (0–3.7)     | 0.013 (0–3.7)   | 0.11                    | -0.47;0.68  | 0.85         |
| <b>Trail Making Test<sup>a</sup></b>        |                   |                 |                         |             |              |
| Trail Making B-A <sup>log</sup> , s         | 39.2 (14.7–101.1) | 33.1 (1.3–79.5) | 0.46                    | -0.12;1.05  | <b>0.002</b> |
| <b><u>Working memory</u></b>                |                   |                 | -0.33                   | -0.84;0.18  | 0.44         |
| <b>Spatial Working Memory</b>               |                   |                 |                         |             |              |
| Strategy score <sup>log</sup>               | 29.9 (20-42)      | 27.9 (19–42)    | -0.24                   | -0.81;0.34  | 0.10         |
| Total errors <sup>log</sup>                 | 10.2 (0–79)       | 10.1 (0–61)     | -0.24                   | -0.81;0.34  | 0.50         |
| <b>Spatial Span:</b>                        |                   |                 |                         |             |              |
| Span length                                 | 6.4 (1.3)         | 6.4 (1.3)       | -0.27                   | -0.85;0.31  | 0.96         |
| <b><u>Processing speed</u></b>              |                   |                 | -1.23                   | -1.83;-0.64 | 0.49         |
| <b>Verbal Fluency<sup>a</sup></b>           |                   |                 |                         |             |              |
| Letters                                     | 19.4 (7.0)        | 18.6 (6.6)      | -1.27                   | -1.86;-0.69 | 0.88         |
| Categories                                  | 39.8 (9.9)        | 42.5 (10.8)     | -0.93                   | -1.51;-0.34 | 0.41         |
| <b>Trail Making Test<sup>a</sup></b>        |                   |                 |                         |             |              |



|                                   |                     |                     |       |             |               |
|-----------------------------------|---------------------|---------------------|-------|-------------|---------------|
| Trail Making A <sup>log</sup> , s | 31.5 (18.0–68.1)    | 32.9 (9.8)          | -0.56 | -1.15;0.02  | 0.95          |
| Trail Making B <sup>log</sup> , s | 73.5 (40.9–169.2)   | 66.1 (38.7–125.4)   | -0.18 | -0.79;0.40  | 0.16          |
| <b>Symbol Digit Modalities</b>    |                     |                     |       |             |               |
| Correct symbols                   | 47.8 (10.2)         | 49.1 (12.3)         | -0.91 | -1.49;-0.33 | 0.50          |
| <b><u>Visuospatial memory</u></b> |                     |                     | 0.39  | -0.17;1.02  | <b>0.0005</b> |
| <b>Rey-Osterreith Figure</b>      |                     |                     |       |             |               |
| Immediate recall, score           | 24.5 (5.4)          | 28.9 (4.1)          | 0.36  | -0.22;0.93  | <b>0.002</b>  |
| Delayed recall, score             | 23.8 (5.0)          | 28.8 (3.8)          | 0.31  | -0.26;0.89  | <b>0.0002</b> |
| <b><u>Attention</u></b>           |                     |                     |       |             |               |
| <b>Rapid Visual Processing</b>    |                     |                     |       |             |               |
| A' sensitivity to target          | 0.9 (0.1)           | 0.92 (0.04)         | -0.14 | -0.71;0.43  | <b>0.03</b>   |
| <b><u>Reaction time</u></b>       |                     |                     | -1.31 | -1.90;-0.71 | 0.90          |
| <b>Reaction Time:</b>             |                     |                     |       |             |               |
| Reaction <sup>log</sup> , ms      | 409.4 (264.9–988.6) | 387.4 (393.0–710.1) | -1.45 | -2.02;-0.88 | 0.68          |
| Movement, ms                      | 417.8 (86.3)        | 412.3 (72.1)        | -0.89 | -1.46;-0.31 | 0.32          |

Normally distributed raw-score variables are shown as mean (SD). Logarithmically transformed variables<sup>log</sup> are shown as arithmetic mean (range). Z-scores and test statistics are given in estimates from a linear mixed model adjusting for education and headache at time of testing and multiple testing. Significant p-values are printed in bold. <sup>a</sup>n=29, as Trail Making Test scores and Verbal Fluency scores from non-native Danish speakers (n=2) were omitted from analysis. Z<sup>b</sup>: Patients at follow-up compared to healthy controls.

## DISCUSSION

This study is the first to comprehensively explore the cognitive functions in a cohort of more than 10 patients with IIH. We examined 31 patients and found moderate to severe deficits in four of six cognitive domains suggesting that IIH is associated with a global cognitive dysfunction.

Cognitive function in IIH has only been reported in three studies[5-7] in addition to a single case-report[8]. One study[6] examined 85 patients but applied only a single memory test and the methodology was not described in details.. The remaining studies performed more extensive cognitive testing, but in contrast to our study were uncontrolled and included only respectively one, five and 10 patients[5;7;8] Prior studies were, in addition, based on patients with a wide range of disease duration (6-98 months) and only one study[5] reported ICP at time of testing. Our study is the first to assessed the cognitive function in a well-defined group of patients with newly diagnosed disease (n=29) or relapse (n=2).

While the case-study of Kaplan et al.[8] found no convincing cognitive deficits, Arseni et al.[6] and Kharkar et al.[7] reported substantial deficits in memory. We found deficits in visuospatial memory and in spatial working memory strategy, but detected no overall difference in working memory.

Verbal memory (measured by Wecheler Memory Scale) was by far the most affected parameter in the study of Kharkar et al. and similarly was reported moderate to severe in 90% of the patients studied by Arseni et al. Although we did not test verbal memory we found significant deficits in other verbal functions (verbal fluency). This is in line with the study of Sorensen et al.[5] reporting verbal deficits in all of their five patients. Deficits in phonological fluency, which were substantial in our patients, have been shown to relate to frontal lobe damage, reflecting an additional executive component.[14]

The most severe deficits in our study were found in the domains of reaction time and processing speed which is consistent with the study of Sorensen et al.[5] In addition we found significant

1  
2  
3  
4 impairment in cognitive flexibility. Cognitive flexibility is fundamental for effective decision-  
5  
6 making and the ability to learn and adapt to environmental changes, but has never been tested in  
7  
8 patients with IHH before.  
9

10 Although overall working memory was not affected in our study, patients did score significantly  
11  
12 worse in the working memory strategy. This may reflect an executive component consistent with  
13  
14 other executive deficits detected in our patients.  
15

16  
17 The deficits we detected in the domains of reaction time, processing speed, visuospatial memory and  
18  
19 attention were equivalent to those found in patients with first episode schizophrenia.[15] In addition  
20  
21 deficits in cognitive flexibility were similar to those (measured by Wisconsin Card Sort, a task  
22  
23 conceptionally akin to the Intra-Extra Dimensional Set Shift Test) found in a meta-analysis of  
24  
25 patients with schizophrenia in general.[16] Verbal fluency in our patients was affected to the same  
26  
27 extents as reported for patients with schizophrenia[16] as well as patients with congenital  
28  
29 hydrocephalus.[14] Furthermore deficits in verbal phonological fluency and processing speed  
30  
31 (measured by Symbol Digit Modalities Test) were in the range found in patients with multiple  
32  
33 sclerosis.[17-19]  
34  
35

36  
37 Despite marked improvement in ICP and headache we found no convincing signs of overall  
38  
39 cognitive improvement at the 3- month follow-up and the improvement seen in the visuospatial tests  
40  
41 could be explained by learning effect (familiarization with the Rey Osterieith Complex Figure).  
42  
43 Sorensen et al.[5] reported that although signs of cognitive dysfunction were only minor, four of their  
44  
45 five patients were unable to manage work and/or everyday activities. In our study 12 of the 31  
46  
47 patients were either on long-term sick-leave or had reduced and altered work schedule due to IHH at  
48  
49 follow up three months after diagnosis. Short follow-up and co-existent headache-symptoms limit  
50  
51 the interpretation of the socioeconomic impact of cognitive dysfunction demonstrated in our study.  
52  
53 However, in other well recognized diseases such as schizophrenia a robust relationship between  
54  
55  
56  
57  
58  
59  
60

1  
2  
3  
4 global and specific cognitive deficits and functional outcome has been consistently  
5  
6 demonstrated.[20;21]  
7

8 The cause of cognitive impairment in IIH remains speculative. Theories could involve dysfunction of  
9  
10 grey and/or white matter substance due to mechanical compression as proposed in normal pressure  
11  
12 hydrocephalus,[14] dysfunction related to axonal flow as in optic nerve swelling and dysfunction[22]  
13  
14 or release of cytotoxic substances as is seen in other conditions with cognitive decline.[23]  
15  
16 However, the pathophysiology of IIH and the related changes in cerebral tissue composition is still  
17  
18 largely unknown. Diffuse cerebral edema has been suggested by some[24;25] but refused by  
19  
20 others.[26;27] Thus further studies of morphological changes in cerebral structure and composition  
21  
22 that could explain the cognitive impairment demonstrated in this study would be of great interest.  
23  
24

25 The strengths of the study is the prospective and controlled design, the broad range of cognitive tests,  
26  
27 a relatively large study population, and the use of a culturally blind and computerized test battery that  
28  
29 by automatic test conduction and score recording reduced the influence of the non-blinded observer.  
30  
31 In addition the study population was well defined with cognitive testing performed in close relation  
32  
33 to IIH diagnosis and ICP measurement. As patients were enrolled consecutively from both  
34  
35 neurological and ophthalmological departments our study population reflects representative IIH-  
36  
37 patients and not a selected group of cognitively symptomatic patients.  
38  
39

40 The study was limited by the non-blinded design, the relatively short follow-up period and the  
41  
42 lacking re-test of healthy controls. In addition controls were not matched for weight or headache.  
43  
44 Applying patients with chronic primary headache as controls could be advocated. However, although  
45  
46 cognitive impairment in other headache disorders such as migraine has been debated,[28-30] a recent  
47  
48 comprehensive review concluded that there is no evidence of cognitive dysfunction in patients with  
49  
50 migraine.[31] Cognitive outcome was adjusted for headache at time of testing, but we were unable to  
51  
52 in addition adjust for BMI as obesity was strongly correlated to being in the patient group. Obesity  
53  
54  
55  
56  
57  
58  
59  
60

1  
2  
3  
4 alone has been associated with cognitive deficits. [32] However, obesity is primarily associated  
5  
6 with deficits in the executive area in contrast to the pattern of deficits found in our patients.  
7

8  
9 In conclusions, this study strongly suggests that IHH is a disabling neurological disorder associated  
10  
11 with moderate to severe cognitive deficits. The results in addition indicate that the cognitive deficits  
12  
13 are long-lasting, not paralleling ICP and headache reduction, and are not sufficiently treated by  
14  
15 diuretics and weight loss. Contrary to our hypothesis executive and memory functions were only  
16  
17 moderately affected. Nevertheless we found substantial deficits in processing speed and reaction time  
18  
19 which could explain some of the severe difficulties that patients encounter in work and daily  
20  
21 activities. A focused multidisciplinary approach including neuropsychological rehabilitation  
22  
23 therefore might be relevant in the treatment of patients with IHH.  
24  
25  
26  
27  
28  
29  
30  
31  
32  
33  
34  
35  
36  
37  
38  
39  
40  
41  
42  
43  
44  
45  
46  
47  
48  
49  
50  
51  
52  
53  
54  
55  
56  
57  
58  
59  
60

## AKNOWLEDGEMENTS

We thank Winnie G. Nielsen, BA; Lene Elkjær, BA and especially Hanne Andresen, BA for tireless effort and technical assistance during data collection (ICP measurements). We thank neuro-ophthalmologists Marianne Wegener, MD and Steffen Hamman, MD, PhD for thorough neuro-ophthalmological examination and evaluation supporting the diagnosis of IHH in our patients.

## COMPETING INTERESTS

H. Yri has received honoraria for consultant work from Neurocore and a travel grant from Berlin-Chemie Menarini. B. Fagerlund and H. Forchhammer report no disclosures. R. Jensen has received honoraria for lectures and patient leaflets from MSD, Berlin-Chemie Menarini, ATI and Pfizer and serves on medical advisory boards for LindeGas, ATI and Neurocore.

## FUNDING

This work was supported by “Region Hovedstadens Forskningsfond” and “Fonden til Lægevidenskabens Fremme”, grant number 12-375. The funding sources had no role in the study design; in the collection, analysis and interpretation data; in the writing of the report; or in the decision to submit the paper for publication.

## AUTHOR CONTRIBUTION

**HM** made a substantive intellectual contribute to the design of the study, acquisition, analysis and interpretation of the data, and the drafting and revision of the manuscript.

**BF** made a substantive intellectual contribute to the design of the study, the interpretation of the data and the revision of the manuscript.

1  
2  
3  
4 **HBF** made a substantive intellectual contribute to the design of the study, the interpretation of the  
5  
6 data and the revision of the manuscript.  
7

8 **RHJ** made a substantive intellectual contribute to the conceptualization and design of the study, the  
9  
10 interpretation of the data and the revision of the manuscript.  
11

#### 12 13 14 15 **DATA SHARING STATEMENT**

16 No additional data are available  
17  
18  
19

#### 20 21 22 **EXCLUSIVE LICENCE**

23  
24 The Corresponding Author has the right to grant on behalf of all authors and does grant on behalf of  
25  
26 all authors, an exclusive licence (or non-exclusive for UK Crown Employees) on a worldwide basis  
27  
28 to the BMJ Publishing Group Ltd, and its Licensees to permit this article (if accepted) to be  
29  
30 published in BMJ Open and any other BMJ PGL products and to exploit all subsidiary rights, as set  
31  
32 out in our licence  
33  
34  
35  
36  
37  
38  
39  
40  
41  
42  
43  
44  
45  
46  
47  
48  
49  
50  
51  
52  
53  
54  
55  
56  
57  
58  
59  
60

## REFERENCES

- 1  
2  
3  
4  
5  
6  
7  
8  
9  
10  
11  
12  
13  
14  
15  
16  
17  
18  
19  
20  
21  
22  
23  
24  
25  
26  
27  
28  
29  
30  
31  
32  
33  
34  
35  
36  
37  
38  
39  
40  
41  
42  
43  
44  
45  
46  
47  
48  
49  
50  
51  
52  
53  
54  
55  
56  
57  
58  
59  
60
- [1] Radhakrishnan K, Thacker AK, Bohlega NH, et al. Epidemiology of idiopathic intracranial hypertension: a prospective and case-control study. *J Neurol Sci* 1993 May;116(1):18-28.
- [2] Radhakrishnan K, Ahlskog JE, Cross SA, et al. Idiopathic intracranial hypertension (pseudotumor cerebri). Descriptive epidemiology in Rochester, Minn, 1976 to 1990. *Arch Neurol* 1993 Jan;50(1):78-80.
- [3] WHO. Global Health Risks: Mortality and burden of disease attributable to selected major risks. 2009. Available at:  
[http://www.who.int/healthinfo/global\\_burden\\_disease/GlobalHealthRisks\\_report\\_full.pdf](http://www.who.int/healthinfo/global_burden_disease/GlobalHealthRisks_report_full.pdf).  
Assessed Sept 6 2013
- [4] Friesner D, Rosenman R, Lobb BM, et al. Idiopathic intracranial hypertension in the USA: the role of obesity in establishing prevalence and healthcare costs. *Obes Rev* 2011 May;12(5):e372-e380.
- [5] Sorensen PS, Thomsen AM, Gjerris F. Persistent disturbances of cognitive functions in patients with pseudotumor cerebri. *Acta Neurol Scand* 1986 Mar;73(3):264-8.
- [6] Arseni C, Simoca I, Jipescu I, et al. Pseudotumor cerebri: risk factors, clinical course, prognostic criteria. *Rom J Neurol Psychiatry* 1992 Apr;30(2):115-32.
- [7] Kharkar S, Hernandez R, Batra S, et al. Cognitive impairment in patients with Pseudotumor Cerebri Syndrome. *Behav Neurol* 2011;24(2):143-8.



- 1  
2  
3  
4 [8] Kaplan CP, Miner ME, McGregor JM. Pseudotumour cerebri: risk for cognitive impairment?  
5  
6 *Brain Inj* 1997 Apr;11(4):293-303.  
7  
8  
9  
10 [9] Friedman DI, Jacobson DM. Diagnostic criteria for idiopathic intracranial hypertension.  
11  
12 *Neurology* 2002 Nov 26;59(10):1492-5.  
13  
14  
15 [10] The International Classification of Headache Disorders, 3rd edition (beta version).  
16  
17 *Cephalalgia* 2013 Jul;33(9):629-808.  
18  
19  
20 [11] Yri HM, Wegener M, Sander B, et al. Idiopathic intracranial hypertension is not benign: a  
21  
22 long-term outcome study. *J Neurol* 2011 Oct 19.  
23  
24  
25 [12] Levaux MN, Potvin S, Sepehry AA, et al. Computerized assessment of cognition in  
26  
27 schizophrenia: promises and pitfalls of CANTAB. *Eur Psychiatry* 2007 Mar;22(2):104-15.  
28  
29  
30 [13] O'Carroll RE, Prentice N, Murray C, et al. Further evidence that reading ability is not  
31  
32 preserved in Alzheimer's disease. *Br J Psychiatry* 1995 Nov;167(5):659-62.  
33  
34  
35 [14] Iddon JL, Pickard JD, Cross JJ, et al. Specific patterns of cognitive impairment in patients  
36  
37 with idiopathic normal pressure hydrocephalus and Alzheimer's disease: a pilot study. *J*  
38  
39 *Neurol Neurosurg Psychiatry* 1999 Dec;67(6):723-32.  
40  
41  
42 [15] Andersen R, Fagerlund B, Rasmussen H, et al. Cognitive effects of six months of treatment  
43  
44 with quetiapine in antipsychotic-naive first-episode schizophrenia. *Psychiatry Res* 2011 May  
45  
46 15;187(1-2):49-54.  
47  
48  
49 [16] Heinrichs RW, Zakzanis KK. Neurocognitive deficit in schizophrenia: a quantitative review  
50  
51 of the evidence. *Neuropsychology* 1998 Jul;12(3):426-45.  
52  
53  
54  
55  
56  
57  
58  
59  
60

- 1  
2  
3  
4 [17] Foong J, Rozewicz L, Quaghebeur G, et al. Executive function in multiple sclerosis. The role  
5 of frontal lobe pathology. *Brain* 1997 Jan;120 ( Pt 1):15-26.  
6  
7  
8  
9  
10 [18] Ruet A, Deloire MS, Charre-Morin J, et al. A new computerised cognitive test for the  
11 detection of information processing speed impairment in multiple sclerosis. *Mult Scler*  
12 Published Online First: 4 Mar 2013. doi: 10.1177/1352458513480251  
13  
14  
15  
16  
17 [19] Lapshin H, Lanctot KL, O'Connor P, et al. Assessing the validity of a computer-generated  
18 cognitive screening instrument for patients with multiple sclerosis. *Mult Scler* Published  
19 Online First: 7 May 2013. doi: 10.1177/1352458513488841  
20  
21  
22  
23  
24 [20] Green MF, Kern RS, Braff DL, et al. Neurocognitive deficits and functional outcome in  
25 schizophrenia: are we measuring the "right stuff"? *Schizophr Bull* 2000;26(1):119-36.  
26  
27  
28  
29  
30 [21] Jaeger J, Tatsuoka C, Berns S, et al. Associating functional recovery with neurocognitive  
31 profiles identified using partially ordered classification models. *Schizophr Res* 2006 Jul;85(1-  
32 3):40-8.  
33  
34  
35  
36  
37 [22] Tso MO, Hayreh SS. Optic disc edema in raised intracranial pressure. IV. Axoplasmic  
38 transport in experimental papilledema. *Arch Ophthalmol* 1977 Aug;95(8):1458-62.  
39  
40  
41  
42  
43 [23] Beeri MS, Moshier E, Schmeidler J, et al. Serum concentration of an inflammatory  
44 glycotoxin, methylglyoxal, is associated with increased cognitive decline in elderly  
45 individuals. *Mech Ageing Dev* 2011 Nov;132(11-12):583-7.  
46  
47  
48  
49  
50 [24] Moser FG, Hilal SK, Abrams G, et al. MR imaging of pseudotumor cerebri. *AJR Am J*  
51 *Roentgenol* 1988 Apr;150(4):903-9.  
52  
53  
54  
55  
56  
57  
58  
59  
60

- 1  
2  
3  
4 [25] Gideon P, Sorensen PS, Thomsen C, et al. Increased brain water self-diffusion in patients  
5 with idiopathic intracranial hypertension. *AJNR Am J Neuroradiol* 1995 Feb;16(2):381-7.  
6  
7  
8  
9 [26] Wall M, Dollar JD, Sadun AA, et al. Idiopathic intracranial hypertension. Lack of histologic  
10 evidence for cerebral edema. *Arch Neurol* 1995 Feb;52(2):141-5.  
11  
12  
13  
14 [27] Joynt RJ, Sahs AL. Brain swelling of unknown cause. *Neurology* 1956 Nov;6(11):801-3.  
15  
16  
17  
18 [28] Mulder EJ, Linssen WH, Passchier J, et al. Interictal and postictal cognitive changes in  
19 migraine. *Cephalalgia* 1999 Jul;19(6):557-65.  
20  
21  
22  
23 [29] Schmitz N, Arkink EB, Mulder M, et al. Frontal lobe structure and executive function in  
24 migraine patients. *Neurosci Lett* 2008 Aug 1;440(2):92-6.  
25  
26  
27  
28  
29 [30] Le PF, Zappala G, Giuffrida S, et al. Memory disturbances in migraine with and without  
30 aura: a strategy problem? *Cephalalgia* 2000 Jun;20(5):475-8.  
31  
32  
33  
34 [31] Rist PM, Kurth T. Migraine and cognitive decline: a topical review. *Headache* 2013  
35 Apr;53(4):589-98.  
36  
37  
38  
39 [32] Raman J, Smith E, Hay P. The clinical obesity maintenance model: an integration of  
40 psychological constructs including mood, emotional regulation, disordered overeating,  
41 habitual cluster behaviours, health literacy and cognitive function. *J Obes* Published Online  
42 First: 14 February 2013. doi: 10.1155/2013/240128  
43  
44  
45  
46  
47  
48  
49  
50  
51  
52  
53  
54  
55  
56  
57  
58  
59  
60

**FIGURE TITLES AND LEGENDS****Figur 1.**

**Title:** Cognitive deficits in patients with IIH at time of diagnosis

**Legends:** Cognitive function in patients with IIH at time of diagnosis (n=31) shown in standard deviations from healthy controls (z-score). Error bars represent S.E.M. Colors indicate which domain the tests represent. \*p<0.05 \*\*p<0.005 \*\*\*p<0.0005.

**Figure 2.**

**Title:** Cognitive deficits in patients with IIH at time of diagnosis and at follow-up

**Legends:** Changes in test performance from time of diagnosis to follow-up (n=29) in patients with IIH shown in standard deviations from healthy controls (z-score). Error bars represent S.E.M. \*p<0.05 \*\*p<0.005 \*\*\*p<0.001.

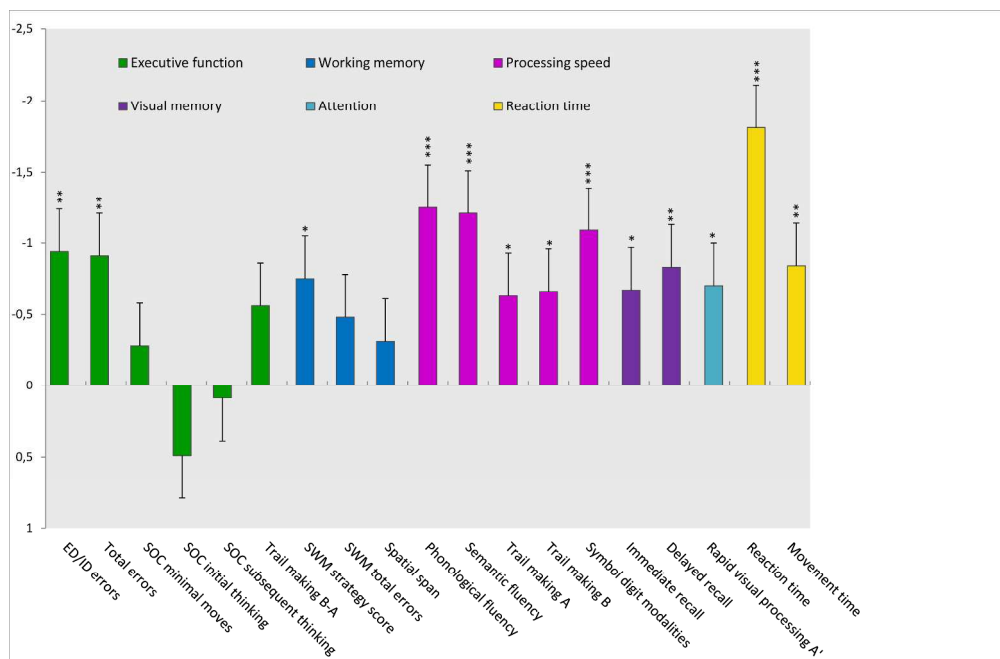

258x169mm (300 x 300 DPI)

Review only

1  
2  
3  
4  
5  
6  
7  
8  
9  
10  
11  
12  
13  
14  
15  
16  
17  
18  
19  
20  
21  
22  
23  
24  
25  
26  
27  
28  
29  
30  
31  
32  
33  
34  
35  
36  
37  
38  
39  
40  
41  
42  
43  
44  
45  
46  
47  
48  
49  
50  
51  
52  
53  
54  
55  
56  
57  
58  
59  
60

1  
2  
3  
4  
5  
6  
7  
8  
9  
10  
11  
12  
13  
14  
15  
16  
17  
18  
19  
20  
21  
22  
23  
24  
25  
26  
27  
28  
29  
30  
31  
32  
33  
34  
35  
36  
37  
38  
39  
40  
41  
42  
43  
44  
45  
46  
47  
48  
49  
50  
51  
52  
53  
54  
55  
56  
57  
58  
59  
60

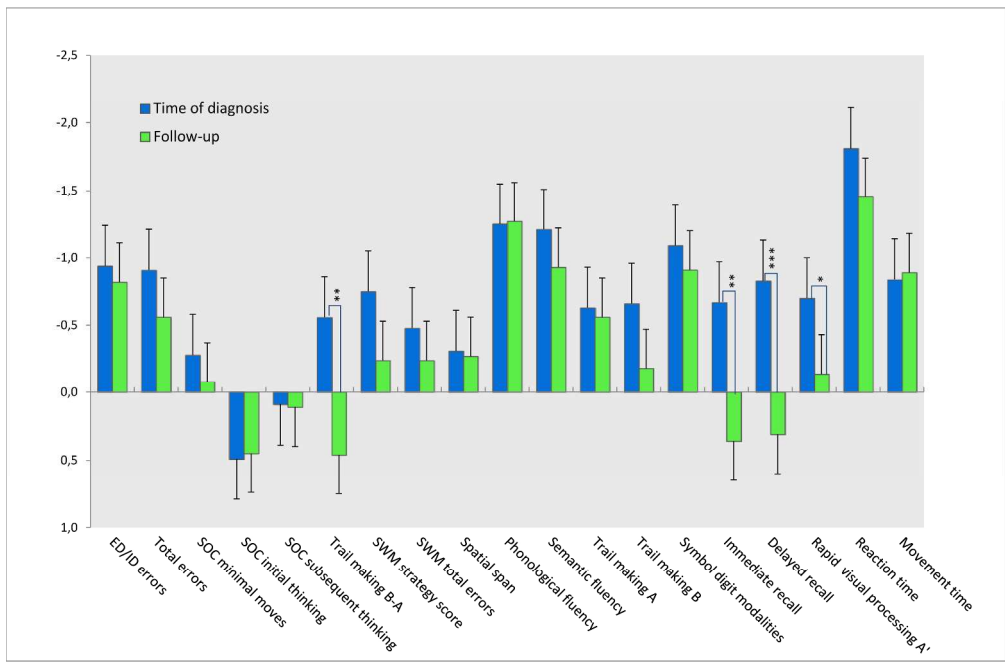

258x169mm (300 x 300 DPI)

Review only

STROBE Statement—Checklist of items that should be included in reports of *case-control studies*

|                              | Item No | Recommendation                                                                                                                                                                                                                                                                                                                                                                                                                                                       |
|------------------------------|---------|----------------------------------------------------------------------------------------------------------------------------------------------------------------------------------------------------------------------------------------------------------------------------------------------------------------------------------------------------------------------------------------------------------------------------------------------------------------------|
| <b>Title and abstract</b>    | 1       | (a) Indicate the study's design with a commonly used term in the title or the abstract <a href="#">page 1</a><br>(b) Provide in the abstract an informative and balanced summary of what was done and what was found <a href="#">page 2</a>                                                                                                                                                                                                                          |
| <b>Introduction</b>          |         |                                                                                                                                                                                                                                                                                                                                                                                                                                                                      |
| Background/rationale         | 2       | Explain the scientific background and rationale for the investigation being reported <a href="#">page 4</a>                                                                                                                                                                                                                                                                                                                                                          |
| Objectives                   | 3       | State specific objectives, including any prespecified hypotheses <a href="#">page 4</a>                                                                                                                                                                                                                                                                                                                                                                              |
| <b>Methods</b>               |         |                                                                                                                                                                                                                                                                                                                                                                                                                                                                      |
| Study design                 | 4       | Present key elements of study design early in the paper <a href="#">page 4-5</a>                                                                                                                                                                                                                                                                                                                                                                                     |
| Setting                      | 5       | Describe the setting, locations, and relevant dates, including periods of recruitment, exposure, follow-up, and data collection <a href="#">page 4-5</a>                                                                                                                                                                                                                                                                                                             |
| Participants                 | 6       | (a) Give the eligibility criteria, and the sources and methods of case ascertainment and control selection. Give the rationale for the choice of cases and controls <a href="#">page 4-5</a><br>(b) For matched studies, give matching criteria and the number of controls per case <a href="#">page 4-5</a>                                                                                                                                                         |
| Variables                    | 7       | Clearly define all outcomes, exposures, predictors, potential confounders, and effect modifiers. Give diagnostic criteria, if applicable <a href="#">page 6-8</a>                                                                                                                                                                                                                                                                                                    |
| Data sources/<br>measurement | 8*      | For each variable of interest, give sources of data and details of methods of assessment (measurement). Describe comparability of assessment methods if there is more than one group <a href="#">page 6-7</a>                                                                                                                                                                                                                                                        |
| Bias                         | 9       | Describe any efforts to address potential sources of bias <a href="#">page 7-8</a>                                                                                                                                                                                                                                                                                                                                                                                   |
| Study size                   | 10      | Explain how the study size was arrived at <a href="#">page 4</a>                                                                                                                                                                                                                                                                                                                                                                                                     |
| Quantitative variables       | 11      | Explain how quantitative variables were handled in the analyses. If applicable, describe which groupings were chosen and why <a href="#">page 7-8</a>                                                                                                                                                                                                                                                                                                                |
| Statistical methods          | 12      | (a) Describe all statistical methods, including those used to control for confounding <a href="#">page 7-8</a><br>(b) Describe any methods used to examine subgroups and interactions <a href="#">page 7-8</a><br>(c) Explain how missing data were addressed <a href="#">page 7-8</a><br>(d) If applicable, explain how matching of cases and controls was addressed <a href="#">page 5</a><br>(e) Describe any sensitivity analyses <a href="#">not applicable</a> |
| <b>Results</b>               |         |                                                                                                                                                                                                                                                                                                                                                                                                                                                                      |
| Participants                 | 13*     | (a) Report numbers of individuals at each stage of study—eg numbers potentially eligible, examined for eligibility, confirmed eligible, included in the study, completing follow-up, and analysed <a href="#">page 10,14,15</a><br>(b) Give reasons for non-participation at each stage <a href="#">page 14</a><br>(c) Consider use of a flow diagram <a href="#">not applied</a>                                                                                    |
| Descriptive data             | 14*     | (a) Give characteristics of study participants (eg demographic, clinical, social) and information on exposures and potential confounders <a href="#">page 10-11</a><br>(b) Indicate number of participants with missing data for each variable of interest <a href="#">page 11,13,16</a>                                                                                                                                                                             |
| Outcome data                 | 15*     | Report numbers in each exposure category, or summary measures of exposure <a href="#">page 10,14,15</a>                                                                                                                                                                                                                                                                                                                                                              |
| Main results                 | 16      | (a) Give unadjusted estimates and, if applicable, confounder-adjusted estimates and                                                                                                                                                                                                                                                                                                                                                                                  |

their precision (eg, 95% confidence interval). Make clear which confounders were adjusted for and why they were included [page 10-16](#)

(b) Report category boundaries when continuous variables were categorized [page 10-11](#)

(c) If relevant, consider translating estimates of relative risk into absolute risk for a meaningful time period [not relevant](#)

Other analyses 17 Report other analyses done—eg analyses of subgroups and interactions, and sensitivity analyses [page 14](#)

### Discussion

Key results 18 Summarise key results with reference to study objectives [page 17-20](#)

Limitations 19 Discuss limitations of the study, taking into account sources of potential bias or imprecision. Discuss both direction and magnitude of any potential bias [page 19-20](#)

Interpretation 20 Give a cautious overall interpretation of results considering objectives, limitations, multiplicity of analyses, results from similar studies, and other relevant evidence [page 20](#)

Generalisability 21 Discuss the generalisability (external validity) of the study results [page 18-20](#)

### Other information

Funding 22 Give the source of funding and the role of the funders for the present study and, if applicable, for the original study on which the present article is based [page 21](#)

\*Give information separately for cases and controls.

**Note:** An Explanation and Elaboration article discusses each checklist item and gives methodological background and published examples of transparent reporting. The STROBE checklist is best used in conjunction with this article (freely available on the Web sites of PLoS Medicine at <http://www.plosmedicine.org/>, Annals of Internal Medicine at <http://www.annals.org/>, and Epidemiology at <http://www.epidem.com/>). Information on the STROBE Initiative is available at <http://www.strobe-statement.org>.



18-02-2011

1  
2  
3  
4  
5  
6  
7  
8 **Protokol**  
9  
10  
11  
12  
13  
14  
15  
16  
17  
18  
19

20 Idiopatisk intrakraniell hypertension – neurobiologiske og neuropsykologiske aspekter  
21  
22  
23  
24  
25  
26  
27  
28  
29  
30  
31  
32

33 Hanne M. Yri<sup>1</sup>, Hysse Forchammer<sup>2</sup>, Birgitte Fagerlund<sup>3</sup>, Marianne Wegener<sup>4</sup>, Steffen Hamman<sup>4</sup>,  
34 Jens Peter Gøtze<sup>5</sup>, Janne Christensen<sup>6</sup>, Ulla Bahne Rasmussen<sup>6</sup> og Rigmor Jensen<sup>1</sup>  
35  
36  
37

38 <sup>1</sup> Neurologisk afdeling, Dansk Hovedpinecenter, Glostrup Hospital, Københavns Universitet  
39

40 <sup>2</sup> Neurologisk afdeling, Glostrup Hospital, Københavns Universitet,  
41

42 <sup>3</sup> Center for Neuropsykiatrisk Skizofreniforskning, Psykiatrisk Center Glostrup, Københavns  
43 Universitet  
44

45 <sup>4</sup> Øjenafdelingen, Glostrup Hospital, Københavns Universitet  
46

47 <sup>5</sup> Klinisk Biokemisk afdeling, Rigshospitalet, Københavns Universitet  
48

49 <sup>6</sup> Centralkøkkenet, Glostrup Hospital  
50  
51  
52  
53  
54  
55  
56  
57  
58  
59

18-02-2011

**Indholdsfortegnelse**

1. Titel.
  2. Sted for undersøgelsen.
  3. Projektdeltagere.
  4. Baggrund.
  5. Formål.
  6. Patientmateriale.
  7. Metoder
  8. Effektmål
  9. Statistik
  10. Rissici, bivirkninger og ulemper
  11. Ethiske overvejelser
  12. Tidsplan.
  13. Publikation.
  14. Økonomi.
  15. Initiativtagere
  16. Referencer.
- Bilag.
1. Lægmandsresumé
  2. Struktureret interview-skema
    - 2a. inklusion
    - 2b. opfølgning
  3. Symptom dagbog
  4. Symptom kalender
  5. Deltager information
    - 5a. forsøgspersoner  $\geq 18$  år
    - 5b. forsøgspersoner 15-17 år
  6. Retningslinjer for rekruttering og informeret samtykke
  7. Samtykkeerklæring
    - 7a. myndige
    - 7b. 15-17 årige
  8. Annonce for raske kontroller
  9. Brev til speciallæge/-afdelinger

18-02-2011

## 10. Flowchart

10a: del I-III

10b: del IV

**1. Titel**

Titel

Idiopatisk intrakraniell hypertension – neurobiologiske og neuropsykologiske aspekter

## 1.2 beskrivende titel

Longitudinell prospektiv undersøgelse af neurobiologiske og neuropsykologiske forhold hos patienter med idiopatisk intrakraniell hypertension.

**2. Sted for undersøgelsen**

Dansk Hovedpinecenter, neurologisk afdeling og Øjenafdelingen Glostrup Hospital, 2600 Glostrup.

**3. Projektdeltagere**

Hanne M Yri, læge, klinisk assistent, neurologisk afdeling, Glostrup Hospital.

Hysse Forchammer, ledende neuropsykolog, neurologisk afdeling, Glostrup Hospital

Birgitte Fagerlund, psykolog, seniorforsker, psykiatrisk center Glostrup

Marianne Wegener, overlæge, Øjenafdelingen Glostrup Hospital

Steffen Hamann, læge, Øjenafdelingen Glostrup Hospital

Janne Christensen, Diætist, Glostrup Hospital

Ulla Bahne Rasmussen, Diætist Glostrup Hospital

Jens Peter Gøtze, overlæge, dr.med., Klinisk Biokemisk Afdeling, Rigshospitalet

Rigmor Jensen, professor, overlæge, dr. med; Dansk Hovedpinecenter, Glostrup Hospital

Kontaktsted: Dansk Hovedpinecenter, Område Nord, Bygning 23, Ndr. Ringvej 69, Glostrup

Hospital, 2600 Glostrup. Tlf.: 38 63 27 96, Fax 43 23 30 71. E-mail: HAMAYR01@glo.regionh.dk

**4. Baggrund**

Idiopatisk intrakraniell hypertension er en lidelse kendetegnet ved forhøjet intrakranielt tryk uden kendt til grundliggende årsag. Diagnosen forudsætter at andre kendte årsager til trykforhøjelsen er udelukket ved grundig radiologisk, serologisk og klinisk udredning. Klinisk er tilstanden kendetegnet ved symptomer i form af en svær hovedpine, synsforstyrrelser i form af transitoriske

18-02-2011

1  
2  
3  
4 visuelle obskurationer (TVO) og dobbeltsyn, samt pulserende tinnitus [9,18]. Objektivt manifesterer  
5 lidelsen sig i de fleste tilfælde med bilateralt papilødem som følge af trykforhøjelsen. Nogle  
6 patienter udvikler af ukendte årsager aldrig papilødem ligesom unilaterale eller asymmetriske  
7 ødemer også forekommer [14]. Udover eventuel abducens parese må der definitions­mæssigt ikke  
8 foreligge andre neurologiske udfald [1, 6].

9  
10 Lidelsen rammer typisk overvægtige kvinder i fødedygtig alder. Incidensen i denne gruppe skønnes  
11 ud fra epidemiologiske studier at være ca. 20 per 100.000 hvilket er 20 gange højere end for  
12 normalbefolkningen [4, 15, 16]. I takt med den aktuelle fedme epidemi verden over må forekomsten  
13 af IIH og dens relaterede morbiditet i gruppen af yngre overvægtige kvinder forventes at være  
14 stadig stigende. På trods af den endnu relative lave forekomst skønnes de socioøkonomiske  
15 konsekvenser af sygdommen at være betydelige [8].

16  
17 De væsentligste komplikationer til forhøjet intrakranielt tryk er risikoen for progredierende og  
18 varigt synstab samt kronisk hovedpine. Hovedpine ses hos ca. 90 % i det initiale akutte forløb af  
19 IIH og hos mange patienter persisterer den som en kronisk invaliderende hovedpine også efter at det  
20 intrakranielle tryk er normaliseret [7].

21  
22 IIH hovedpinens karakteristika er ikke entydige og kan i sine manifestationer ligne såvel migræne  
23 som andre primære hovedpineformer. I det Internationale Hovedpineselskab's  
24 Klassifikation(ICH­D-II) af IIH forudsættes at hovedpinen aftager ved normalisering af trykket og  
25 forsvinder inden for 72 timer ved opretholdelse af normalt tryk [1]. Dette er dog i praksis et  
26 vanskeligt anvendeligt kriterium, der primært er bygget på en klinisk observation, idet  
27 trykmålingerne er invasive og sjældent kontinuerlige. Kriterierne er imidlertid aldrig blevet  
28 systematisk evalueret.

29  
30 Patogenesen bag hovedpinens kronificering er ukendt, men en øget aktivering (ekscitation) af  
31 områder i centralnervesystemet der har med smertebehandling at gøre (central sensibilisering) kan  
32 tænkes at være involveret.

33  
34 Central sensibilisering manifesterer sig bl.a. ved allodyni (smerte ved ikke-smertefulde stimuli) og  
35 hyperalgesi (øget respons på smertestimuli) som vha. Quantitative Sensory Testing (QST) kan  
36 måles som hhv. nedsatte smertetærskler og øget smertefølsomhed for stimuli over tærskelniveau  
37 (Supra Threshold Score).

38  
39  
40  
41  
42  
43  
44  
45  
46  
47  
48  
49  
50  
51  
52  
53  
54 Synstabet ved forhøjet intrakranielt tryk er i de fleste tilfælde langsomt progredierende og kan  
55 initielt være asymptomatisk idet det centrale synsfelt typisk først påvirkes sent i forløbet. Ved  
56  
57  
58

18-02-2011

1  
2  
3  
4 længerevarende ødem og trykpåvirkning indskrænkes synsfeltet efterhånden som atrofin tiltager.  
5 En ældre, større prospektiv undersøgelse af 50 IIH patienter påviste blivende synsdefekter hos knap  
6 halvdelen af patienterne, mens 5 % -10 % af patienterne blev blinde på et eller begge øjne [27].  
7

8 I tillæg til tidligere nævnte klassiske symptomer ved IIH synsforstyrrelser, hovedpine, pulserende  
9 tinnitus) synes tilstanden i høj grad at være associeret med kognitiv og psykisk påvirkning. På trods  
10 af at IIH patienterne hyppigt klager over kognitive symptomer er de reelle deficits kun sparsomt  
11 undersøgt. Et studie af 85 patienter som udelukkende testede hukommelse rapporterede fandt en  
12 påvirkning hos 24 % af patienterne [2]. En anden og mindre undersøgelse tyder på at de kognitive  
13 deficits er reversible ved normalisering af trykket [24].  
14

15 Depression- og angstsymptomer forekommer også hyppigt hos IIH [11, 12] også uden forudgående  
16 psykisk sygdom og påvirker i kombination med de fysiske gener patienternes livskvalitet og  
17 funktionsniveau. Da depression og angst ifølge flere tidligere studier kan påvirke patienternes  
18 præsentation ved neuropsykologiske test [5, 10, 17, 26] er det vigtigt at kontrollere herfor disse ved  
19 undersøgelse af de kognitive test.  
20

21 Vægttab er udover medicinsk behandling og i hurtigt progredierende tilfælde kirurgisk intervention  
22 den primært anbefalede behandling. Flere studier har vist positiv effekt på forløb og nedsat behov  
23 for medicinsk behandling efter selv mindre vægttab [13, 23, 27, 28]. Et helt nyt prospektivt studie  
24 på 25 patienter viste klar signifikant reduktion i ICP samt bedring af symptomer og papilødem efter  
25 lav energi diæt og vægttab [20].  
26

27  
28  
29 Der foreligger endnu ikke tilfredsstillende forklaring på den patogenetiske kobling mellem  
30 overvægt og IIH. Såvel simpel mekanisk kompression af central fordelt fedtvæv medførende  
31 intraabdominal og sidenhen intrakraniell venøs trykforhøjelse som mere kompleks neuroendokrin  
32 dysfunktion har været foreslået [3, 19, 25]. F.eks. er ekspressionen af det cortisol dannende enzym  
33 11 $\beta$ -HSD1 som indgår i homeostasen og reguleringen af det intraokulære tryk og på lignende vis  
34 tænkes at have en rolle i CSF regulationen, forhøjet i fedtvæv [19, 21]. I et nyligt studie er det vist  
35 at ekspressionen af dette enzym falder ved vægttab hos IIH patienter. Faldet i enzymaktivitet  
36 korrelerede endvidere med symptombedring og demonstreret fald i ICP. [21]  
37

38  
39 Andre vægtrelaterede og mulige regulatorer af ICP homeostasen er de natriuretiske peptider. En af  
40 undertyperne C-type natriuretisk peptid (CNP) der har kendt vasodilaterende virkning har et tæt  
41 koncentration af receptorer på plexus choroideus hvor to tredjedele af CSF produceres.  
42  
43  
44  
45  
46  
47  
48  
49  
50  
51

18-02-2011

1  
2  
3  
4 Kombinationen af en nedsat plasmakoncentration af Pro-CNP hos IIH patienter og en stigning af  
5 samme i relation til vægttab og symptombedring er netop fundet i Maren Skau's studie fra Dansk  
6 Hovedpinecenter [22] og en vægtrelateret dysregulation af kardonus er foreslået involveret i  
7  
8 patogenesen bag IIH.

9  
10 Livstilsændring og vedligehold af opnået vægttab synes at være den største udfordring i  
11 overvægtsproblematikken. I en nylig opfølgingsundersøgelse af en gruppe IIH- patienter fra DHC  
12 havde kun 24 % opnået et vedvarende vægttab ( $\geq 5$  %), mens næsten halvdelen af patienterne  
13 (48 %) ligefrem havde taget på efter diagnosetidspunktet på trods af diætistforløb og udtrykkelig  
14 information om den latente risiko for permanente synsdeficit [29].  
15  
16  
17  
18  
19  
20  
21  
22  
23

## 24 5. Formål

25 Formålet med studiet er at belyse oftalmologiske, kliniske og neuropsykologiske aspekter af IIH  
26  
27

28  
29 **Del I. Formål: at karakterisere den initiale IIH hovedpine og evaluere de eksisterende**  
30 **diagnostiske kriterier**  
31

32  
33  
34 **Del II. Formål: at undersøge en eventuel påvirkning af den kognitive funktion ved IIH samt**  
35 **ændring i relation til behandling.**  
36  
37

38  
39 **Del III. Formål: at identificere og undersøge mulige biomarkører for IIH**  
40  
41

42 **Del IV. Formål: at undersøge den prognostiske effekt af et IIH-skoleforløb**  
43  
44  
45  
46

## 47 6. Forsøgspersoner

48 Patienter vil blive rekrutterede fra Dansk Hovedpine Center, neurologisk, neurokirurgisk samt  
49 oftalmologisk afdeling, Glostrup Hospital. Der vil ligeledes blive rettet henvendelse til landets  
50 øvrige neurologiske, neurokirurgiske og oftalmologiske afdelinger med henblik på rekruttering af  
51 patienter samt ved opslag på diverse opslagstavler og afdelingernes hjemmesider (se annonce).  
52  
53  
54  
55  
56  
57  
58  
59

18-02-2011

Raske kontroller til del II vil blive rekrutteret fra Dansk Hovedpine Center, mens der til del III vil blive anvendt et allerede indsamlet materiale [22] (protokol journalnummer H-KA 20070003).

Undersøgelse af kontroller til del II omfatter udelukkende de kognitive funktioner som beskrevet under punktet nedenfor.

**Del I: 25 IIH-patienter**

**Inklusionskriterier:**

Alder mellem 15 til 65 år

IIH i henhold til det Internationale Hovedpine Selskabs klassifikationskriterier (ICHD- II)

Anden intrakraniell patologi er udelukket med CT- angio eller MR venografi

**Eksklusionskriterier:**

Andre alvorlige somatiske sygdomme

Alvorlig psykisk sygdom

Kronisk hovedpine af andre årsager

Analgetikaoverforbrug iht. ICHD-II

Profylaktisk behandling mod hovedpine

Utilstrækkelige dansk-kundskaber

**Del II: 25 IIH-patienter og 25 raske kontroller**

**Inklusionskriterier for patienter:**

Alder mellem 15 til 65 år

ICP > 25 cm H<sub>2</sub>O

IIH i henhold til det Internationale Hovedpine Selskabs klassifikationskriterier (ICHD- II)

Anden intrakraniell patologi er udelukket med CT- angio eller MR venografi

**Inklusionskriterier for kontroller:**

Alder mellem 15 til 60 år

18-02-2011

Primær hovedpine

### **Eksklusionskriterier for patienter og kontroller**

Andre alvorlige somatiske sygdomme

Alvorlig psykisk sygdom

Kendte kognitive deficit eller sygdomme/ tilstande der påvirker den kognitive funktion

Behandling med medikamenter hvor kognitiv påvirkning er sandsynlig

Utilstrækkelige dansk-kundskaber

**Del III:** 25 IIH-patienter samt tidligere indhentede blodprøve- og spinalvæskeprøver fra 20 raske overvægtige kontroller

### **Inklusionskriterier:**

Alder mellem 15 til 65 år

IIH i henhold til det Internationale Hovedpine Selskabs klassifikationskriterier (ICHD- II)

Anden intrakraniell patologi er udelukket med CT- angio eller MR venografi

ICP > 25 cm H<sub>2</sub>O

### **Eksklusionskriterier:**

Andre alvorlige somatiske sygdomme

Kendte hjertelidelse

Utilstrækkelige dansk-kundskaber

**Del IV:** 25 IIH-patienter

### **Inklusionskriterier:**

Alder mellem 15 til 65 år

ICP > 25 cm H<sub>2</sub>O

IIH i henhold til det Internationale Hovedpine Selskabs klassifikationskriterier (ICHD- II)



18-02-2011

Anden intrakraniel patologi er udelukket med CT- angio eller MR venografi

### **Eksklusionskriterier:**

Andre alvorlige somatiske sygdomme

Alvorlig psykisk sygdom

Kronisk hovedpine af andre årsager

Analgetika overforbrug iht. ICHD-II

Utilstrækkelige dansk-kundskaber

## **7. Metode**

For oversigt over undersøgelser se flowchart (bilag)

### **Generel klinisk undersøgelse**

En komplet journaloptagelse, inklusiv detaljeret interviewskema (se bilag 2a), samt neurologisk og somatisk undersøgelse vil blive foretaget på alle IHH-patienter ved diagnose eller inklusions-tidspunkt. Demografiske data (højde, vægt, liv- og hoftemål) bestemmes for samtlige forsøgsdeltagere, lige såvel som kardiovaskulær sygdom udelukkes ved BT-måling og EKG. Lumbalpunktur med registrering af åbningstryk samt tapning af cerebrospinalvæske til såvel biokemisk undersøgelse som opnåelse af et normaliseret sluttryk foretages ved inklusion samt efter 3 måneders behandling. Ved opfølgende kontroller er 30, 60 og 90 dage gentages det strukturerede interview i en forkortet udgave (bilag 2b)

### **Generel oftalmologisk undersøgelse**

Synsstyrke (visus): ETDRS og Snellen

Farvesyn (Ishihara), pupilrefleks, motilitets- og diplopi vurdering, spaltelampeundersøgelse, intraokulær trykmåling (Goldmann) og indirekte oftalmoskopi i medicinsk mydriasis.

Synsfeltsundersøgelse: Automatiseret perimetri (Humphrey Static Perimetry 30-2)

Fundus-foto

Optical coherence tomography (peripapillært samt makulært med sfærisk korrektion) med måling af RNFL og RT

18-02-2011

Ovennævnte undersøgelser foretages ved inklusion samt efter 1 og 3 mdr. Den kliniske del foretages af neurooftalmolog MW

Diamox og evt. Furix behandling vil blive seponeret 72 timer forud for Oftalmologisk undersøgelse samt trykmåling. For Topimax er seponeringsperioden 7 døgn.

### **Hovedpinekarakteristika (del I)**

Patienter vil blive bedt om at føre en detaljeret hovedpine/symptomdagbog (se bilag 3) den 1. måned efter diagnosticering/inklusion. Derefter overgår patienterne til en mindre omfattende registrering ved en hovedpine/symptom kalender (se bilag 4).

Til vurdering af central sensibilisering vil patienterne blive undersøgt ved Quantitative Sensory Testing. Metoden bestemmer smertetærskler samt Supra Threshold Score vha. trykalgometer, palpometer, og elektrisk stimulation.

### **Kognitiv vurdering (del II)**

Den kognitive funktion undersøges dels ved et batteri sammensat af neuropsykologiske test som måler forsøgsdeltagerens evne til at løse en række opgaver der afspejler den globale kognitive funktion. Undersøgelserprogrammet vil bestå af dels computeriserede test (CANTAB) og dels tests på papirform. Som supplement til den kognitive testning foretages efterfølgende supplerende test og spørgeskemaer til vurdering af symptomer på depression og angst, livskvalitet og præmorbidit funktionsniveau.

Ovennævnte undersøgelses program foretages hos IIH patienter på diagnosetidspunktet snarest muligt efter opstart af relevant behandling og gentages efter 3 mdrs. behandling. Raske kontrolpersoner undersøges ved en enkelt anledning. Intensiteten af eventuel hovedpine på forsøgsdagen noteres.

IIH patienter vil som led i den generelle udredning af sygdommen få foretaget en voxel morfometrisk MR scanning. Disse scanningsfund vil blive vurderet mhp. differentialdiagnoser og en eventuel association mellem synlige substans forandringer og kognitiv påvirkning.

### **Biomarkører (del III)**

18-02-2011

1  
2  
3  
4 Faste-blodprøver ved inklusion samt efter 1 og 3 mdr.: glukose, HbA1c, lipider, total Kolesterol,  
5 Kolesterolfraktioner, Na, K, kreatinin, Hb. ANP, BNP, CNP samt pro-ANP, Pro-BNP og pro-CNP,  
6 angiotensin, cytokiner, cholecystokinin, leptin, grehlin, og relaterede peptider.

7  
8  
9 Cerebrospinalvæske (tappes i forbindelse med trykmåling) ved inklusion og efter 3 mdr.: celler,  
10 glukose, protein, IgG-index, ANP, BNP, CNP, pro-ANP, Pro-BNP og pro-CNP, angiotensin,  
11 glukose, HbA1c, lipider, total kolesterol, kolesterolfraktioner, cytokiner, cholecystokinin, leptin,  
12 grehlin, og relaterede peptider.  
13  
14

### 15 16 17 **IIH-skole (del IV)**

18 Forsøgspersoner med IIH inkluderet i del I-III vil i forlængelse af disse studier blive tilbudt at indgå  
19 i del IV. I dette studie blok-randomiseres forsøgspersonerne i blokke á 6 stk. til a) et IIH-skole  
20 forløb og b) almindeligt opfølgingsforløb  
21  
22

23 IIH-skoleforløbet består af et forløb over 12 uger med 6 sessioner bestående af a) individuel  
24 undersøgelse og vejledning, b) undervisning i grupper og c) samtalegrupper.  
25

26 Undervisning, vejledning og undersøgelse forestås af diætist, fysioterapeut, psykolog,  
27 sygeplejerske/sosu-assistent og forsøgsansvarlige læge. Efter afsluttet forløb følges patienterne med  
28 besøg efter 6 og 12 mdr.  
29

30 Samtlige forsøgspersoner får foretaget:  
31

32 Detaljeret øjenundersøgelse (ovenfor beskrevet): ved opstart samt efter 1, 3, 6 og 12 mdr.  
33

34 Objektiv undersøgelse i form af vægt, talje- og hoftemål, kondital, blodtryk, blodprøver med plasma  
35 værdier af kolesterol, lipider og BS foretages ved opstart, efter 1, 2,3, 6 og 12 mdr.  
36

37 Struktureret interviewskema i den forkortede udgave (bilag 2b) med henblik på symptomer og  
38 medicinsk behandling samt spørgeskema til selv vurderet livskvalitet udfyldes ved opstart samt efter  
39 1, 3, 6 og 12 mdr.  
40  
41  
42  
43  
44

## 45 **8. Effektmål**

### 46 Primære effektmål

#### 47 *Del I*

48 At karakterisere Hovedpinen og forløbet af denne de første 3 måneder efter debut af IIH.

49 At validere de eksisterende diagnostiske ICHD-II kriterier for IIH  
50  
51  
52  
53  
54

#### 55 *Del II*

18-02-2011

1  
2  
3  
4 At undersøge forekomsten af kognitive deficits hos IIH patienter samt effekten af behandling på  
5 denne.  
6

7  
8  
9 *Del III*

10 Forskel i plasma-koncentrationen af appetit-regulerende hormoner mellem IIH-patienter og raske,  
11 vægt korrelerede kontroller.  
12

13 Forskel i cerebrospinalvæskens koncentrationen af appetit-regulerende hormoner mellem IIH-  
14 patienter og raske, vægt korrelerede kontroller.  
15

16 Forskellen i plasma- og csf-koncentrationen af pro-ANP, pro-BNP og pro-CNP mellem IIH-  
17 patienter og vægt-korrelerede raske kontroller før vægttab.  
18

19 Forskellen i plasma- og csf-koncentrationen af pro-ANP, pro-BNP og pro-CNP hos IIH-patienter  
20 før og efter vægttab.  
21

22 Forskel i plasma- og cerebrospinalvæskekonzentration af cytokiner, lipid og kolesterol mellem  
23 IIH-patienter og raske, vægt korrelerede kontroller.  
24

25  
26  
27  
28  
29 *Del IV*

30 At undersøge effekten af et IIH-skoleforløb på outcomeparametre i form af vægt, synsfunktion,  
31 hovedpine, medicineringsbehov og livskvalitet  
32

33  
34  
35 Sekundære effektmål:

36  
37 *Del I:*

38 At undersøge for tegn på central sensibilisering ved IIH hovedpine.  
39

40  
41  
42 *Del II*

43 At undersøge for fund af strukturelle ændringer på IIH-patienters diagnostiske MR scanning med  
44 evt. kognitive defekter. At beskrive forskelle i selv vurderet livskvalitet, angst og  
45 depressionssymptomer mellem IIH-patienter og andre patienter med kroniske hovedpine.  
46  
47  
48  
49  
50  
51

52 **9. Statistik**

53  
54  
55 Parametrisk og non-parametrisk statistik vil blive brugt afhængigt af, om data er normalfordelt.  
56 Forskelle i effektparametre mellem patienter og kontroller vil blive testet med uparret statistik.  
57  
58  
59

18-02-2011

1  
2  
3  
4 Forskelle i effektparametre hos patienter ved start og under followup vil blive testet med parret  
5 statistik. Der benyttes signifikansniveau 5 %.  
6  
7

8  
9 Beregning af nødvendigt antal forsøgspersoner:

10  
11 Der accepteres en risiko for type 1 fejl på 5 % og en risiko for type 2 fejl på 20 % (dvs. power 80  
12 %). En decideret power beregning er ikke mulig grundet det begrænsede kendskab til de planlagte  
13 effektparametres størrelse og varians. Dropout ved studierne I-III forventes at være relativ lav (cirka  
14 10 %), eftersom undersøgelserne kan gennemføres i forbindelse med opfølgning på Hovedpine  
15 Centeret og på Øjenafdelingen. Pga. symptomer og risikoen for udvikling af varige synsdefekter er  
16 patienterne generelt motiverede for opfølgning de første måneder. Dropout ved studie IV forventes  
17 noget højere (ca. 20 %) pga. det længere forløb. Det nødvendige antal af forsøgspersoner vurderes  
18 at være 25 personer.  
19  
20  
21  
22  
23  
24  
25  
26  
27  
28

## 29 **10. Rissici, bivirkninger og ulemper**

### 30 **10.1. Vedrørende undersøgelsen som helhed**

31  
32 De planlagte undersøgelser er kendte og anvendes i forvejen som led i klinisk udredning og  
33 behandlingskontrol og det skønnes derfor ikke at medføre unødigt ulempe og risici for patienterne.  
34  
35  
36  
37  
38

### 39 **10.2. Vedrørende øjenundersøgelserne**

40 De oftalmologiske undersøgelser er alle i forvejen kendte og anvendte undersøgelser i klinikken hos  
41 andre patientgrupper. De er atraumatiske og udgør ikke nogen risiko eller noget nævneværdigt  
42 ubehag. De anvendte mydriatika (mydriacyl, metaoxedrin) er alment anvendte i klinikken.  
43 Velkendte bivirkninger er kortvarig akkomodationsbesvær og lysskyhed. Dråberne er  
44 kontraindicerede ved snærvinklet glaukom. Glaukom og svær refraktionsanomali er  
45 eksklusionskriterier i undersøgelsen.  
46  
47  
48  
49  
50  
51

### 52 **10.3. Vedrørende laboratorieundersøgelserne**

53 Blodprøvetagning udgør ikke nogen risiko eller noget nævneværdigt ubehag.  
54  
55  
56  
57  
58  
59

18-02-2011

1  
2  
3  
4 Lumbalpunktur indgår som en vanlig diagnostisk undersøgelse som er påkrævet for at stille  
5 diagnosen uanset om patienten indgår i projektet eller ej. Risikoen for infektion ved lumbalpunktur  
6 er yderst minimal. Indgrebet vil blive foretaget ved aseptisk teknik. En eventuel infektion vil blive  
7 behandlet med antibiotika. Risikoen for postlumbal lavtrykshovedpine er 5-7 % og kan behandles  
8 konservativt med sengeleje og væske samt eventuelt med blood patch. Let smerte må forventes.

#### 14 **10.4. Vedrørende undersøgelse for central sensibilisering**

15 Undersøgelsen udgør ikke nogen risiko for forsøgspersonen. Den langsomme stigning i  
16 stimulusstyrke sikrer, at kun moderat smerte påføres.

17 Vi har stor erfaring med disse smertemålinger og de har aldrig givet anledning til uhensigtsmæssigt  
18 ubehag.

#### 24 **10.5. Vedrørende den kognitive testning**

25 Den kognitive testning samt den tilknyttede MR scanning udgør ikke nogen risiko eller ubehag for  
26 patienten.

### 32 **11. Ethiske overvejelser**

#### 36 **11.1. Vedrørende projektet som helhed**

37 Denne patientgruppe repræsenterer en relativ sjælden sygdom, der dog er i hastig stigning på grund  
38 af fedmeepidemien og sygdomsmekanismen kendes kun sparsomt. I betragtning af sygdommens  
39 betydelige invaliditetsgrad, den unge aldersgruppe, store risiko for blindhed og de ringe  
40 behandlingsmuligheder vil en systematisk undersøgelse af denne patientgruppe være af meget stor  
41 betydning og dermed til fulde opveje de minimale ulemper og risici, der er ved den aktuelle  
42 undersøgelse

#### 49 **11.2. Ethiske overvejelser vedrørende data**

50 Personidentificerbare data vil blive anonymiseret og behandlet i hht. Datatilsynets regler. Studiet vil  
51 blive anmeldt til datatilsynet.

#### 56 **11.3. Ethiske overvejelser vedrørende biologisk materiale**

18-02-2011

1  
2  
3  
4 Da ikke alle analyser udføres i umiddelbart tilslutning til udtagelse samt da der ønskes mulighed for  
5 yderligere analyser ved opståen af ny viden oprettes en forskningsbiobank. Henholdsvis 10 ml  
6 spinalvæske og 10 ml veneblod opbevares efter centrifugering og afpippetering i fryser. Materiale  
7 opbevares i anonymiseret form 15 år hvorefter det destrueres. Forsøgsdeltagere kan dog til enhver  
8 tid ved tilkendegivelse heraf få sit materiale destrueret. Materialet vil ikke blive videregivet til  
9 andre. Ny forskning i det biologiske material kan kun ske efter tilladelse fra Videnskabs Etisk  
10 Komité  
11  
12  
13  
14  
15  
16

#### 17 **11.4. Etiske overvejelser vedrørende information**

18 Deltagerne giver skriftligt tilsagn om deltagelse i undersøgelsen efter at have modtaget  
19 fyldestgørende skriftlig og mundtlig information om formål, metode, ulemper og risici ved  
20 undersøgelsen. Deltagelsen er frivillig og deltagerne kan til enhver tid trække sig ud af  
21 undersøgelsen, uden at det vil få konsekvenser for deres fremtidige udredning og behandling.  
22 Undersøgelserne forventes ikke at medføre ubehag. Det anses derfor for etisk forsvarligt at  
23 gennemføre denne undersøgelse. Undersøgelserne vil blive udført i overensstemmelse med  
24 Helsinkideklarationen, modificeret ved 42. verdenskongres i 2000.  
25  
26  
27  
28  
29  
30  
31  
32  
33  
34  
35

#### 36 **12. Tidsplan**

##### 37 Delstudie I-III

38 01.04.2011 - 31.03.2012 Inklusion af forsøgspersoner. Indsamling af data.  
39  
40  
41

42 01.04.2012 – 31.03.2013 Sammenskrivning af data til artikelform.  
43  
44

##### 45 Delstudie IV

46 01.07.2011 - 30.07.2013 Inklusion af forsøgspersoner. Indsamling af data.  
47  
48  
49

50 01.10.2013 - 28.02.2014 Sammenskrivning af data til artikelform.  
51  
52  
53  
54  
55  
56  
57  
58  
59

18-02-2011

### 13. Publikationer

Såvel positive som negative resultater vil blive offentliggjort.

Tentative titler og aftalt forfatternækkefølge:

- 1) Yri HM, Wegener M, Hamman S, Jensen R: Characterization of Idiopathic Intracranial Hypertension related headache and symptoms in the initial 3 months after diagnosis.
- 2) Yri HM, Jensen R: Evaluation of the ICHD-II Diagnostic criteria for Idiopathic Intracranial Hypertension
- 3) Yri HM, Forchammer H, Fagerlund B, Jensen R: Cognitive Impairment in Idiopathic Intracranial Hypertension
- 4) Yri HM, Wegener M, Hamman S, Gøtze JP, Jensen R: The role of regulatory peptides in IIH
- 5) Yri HM, Wegener M, Hamman s, Christensen J, Rasmussen U.B, R. Jensen: IIH Headache school: Therapeutic Effect and Clinical Outcome

### 14. Økonomi

Der er endnu ikke opnået midler til finansiering af undersøgelsen. Der ansøges om økonomisk støtte ved offentlige og private fondsmidler. Videnskabsetisk komité samt forsøgsdeltagere der aktuelt er i forsøget vil blive underrettet om beløb, udbetalingsmåde og navn på den enkelte støtteejer samt dennes forbindelse til projektansvarlige så snart økonomisk støtte til undersøgelsen foreligger. Forsøgspersoner vil blive tilbudt transportgodtgørelse svarende til billigste transportmulighed og modtager ikke anden godtgørelse for deltagelse i undersøgelsen

### 15. Initiativtagere

Initiativ til projektet er taget af Hanne M. Yri og Rigmor Jensen

### 16. Referencer



18-02-2011

- 1  
2  
3  
4 1. (2004) The International Classification of Headache Disorders: 2nd edition. *Cephalalgia* 24  
5 Suppl 1:9-160  
6
- 7  
8 2. Arseni C, Simoca I, Jipescu I, Leventi E, Grecu P, Sima A (1992) Pseudotumor cerebri: risk  
9 factors, clinical course, prognostic criteria. *Rom J Neurol Psychiatry* 30:115-132  
10
- 11  
12 3. Bloomfield GL, Ridings PC, Blocher CR, Marmarou A, Sugerman HJ (1997) A proposed  
13 relationship between increased intra-abdominal, intrathoracic, and intracranial pressure. *Crit*  
14 *Care Med* 25:496-503  
15
- 16  
17 4. Durcan FJ, Corbett JJ, Wall M (1988) The incidence of pseudotumor cerebri. Population  
18 studies in Iowa and Louisiana. *Arch Neurol* 45:875-877  
19
- 20  
21 5. Fisher DG, Sweet JS, Pfaelzer-Smith EA (1986) Influence of depression on repeated  
22 neuropsychological testing. *International Journal of Clinical Neuropsychology* VIII:4-8  
23
- 24  
25 6. Friedman DI, Jacobson DM (2002) Diagnostic criteria for idiopathic intracranial hypertension.  
26 *Neurology* 59:1492-1495  
27
- 28  
29 7. Friedman DI, Rausch EA (2002) Headache diagnoses in patients with treated idiopathic  
30 intracranial hypertension. *Neurology* 58:1551-1553  
31
- 32  
33 8. Friesner D, Rosenman R, Lobb BM, Tanne E (2010) Idiopathic intracranial hypertension in  
34 the USA: the role of obesity in establishing prevalence and healthcare costs. *Obes Rev*  
35
- 36  
37 9. Giuseffi V, Wall M, Siegel PZ, Rojas PB (1991) Symptoms and disease associations in  
38 idiopathic intracranial hypertension (pseudotumor cerebri): a case-control study. *Neurology*  
39 41:239-244  
40
- 41  
42 10. Hodgues WF, Spielberger CD (1969) An indicant of trait or state anxiety? *J Consult Clin*  
43 *Psychol* 33:430-434  
44
- 45  
46 11. Kesler A, Mosek A, Fithlicher N, Gidron Y (2005) Psychological correlates of idiopathic  
47 intracranial hypertension. *Isr Med Assoc J* 7:627-630  
48
- 49  
50 12. Kleinschmidt JJ, Digre KB, Hanover R (2000) Idiopathic intracranial hypertension:  
51 relationship to depression, anxiety, and quality of life. *Neurology* 54:319-324  
52  
53  
54  
55  
56  
57  
58

18-02-2011

- 1
- 2
- 3
- 4 13. Kupersmith MJ, Gamell L, Turbin R, Peck V, Spiegel P, Wall M (1998) Effects of weight loss
- 5 on the course of idiopathic intracranial hypertension in women. *Neurology* 50:1094-1098
- 6
- 7
- 8 14. Marcelis J, Silberstein SD (1991) Idiopathic intracranial hypertension without papilledema.
- 9 *Arch Neurol* 48:392-399
- 10
- 11
- 12 15. Radhakrishnan K, Ahlskog JE, Cross SA, Kurland LT, O'Fallon WM (1993) Idiopathic
- 13 intracranial hypertension (pseudotumor cerebri). Descriptive epidemiology in Rochester,
- 14 Minn, 1976 to 1990. *Arch Neurol* 50:78-80
- 15
- 16
- 17 16. Radhakrishnan K, Thacker AK, Bohlega NH, Maloo JC, Gerryo SE (1993) Epidemiology of
- 18 idiopathic intracranial hypertension: a prospective and case-control study. *J Neurol Sci*
- 19 116:18-28
- 20
- 21
- 22 17. Richards PM, Ruff RM (1989) Motivational effects on neuropsychological functioning:
- 23 comparison of depressed versus nondepressed individuals. *J Consult Clin Psychol* 57:396-402
- 24
- 25
- 26 18. Round R, Keane JR (1988) The minor symptoms of increased intracranial pressure: 101
- 27 patients with benign intracranial hypertension. *Neurology* 38:1461-1464
- 28
- 29
- 30 19. Sinclair AJ, Ball AK, Burdon MA, Clarke CE, Stewart PM, Curnow SJ, Rauz S (2008)
- 31 Exploring the pathogenesis of IIH: an inflammatory perspective. *J Neuroimmunol* 201-
- 32 202:212-220
- 33
- 34 20. Sinclair AJ, Burdon MA, Nightingale PG, Ball AK, Good P, Matthews TD, Jacks A, Lawden
- 35 M, Clarke CE, Stewart PM, Walker EA, Tomlinson JW, Rauz S (2010) Low energy diet and
- 36 intracranial pressure in women with idiopathic intracranial hypertension: prospective cohort
- 37 study. *BMJ* 341:c2701
- 38
- 39 21. Sinclair AJ, Walker EA, Burdon MA, van Beek AP, Kema IP, Hughes BA, Murray PI,
- 40 Nightingale PG, Stewart PM, Rauz S, Tomlinson JW (2010) Cerebrospinal Fluid
- 41 Corticosteroid Levels and Cortisol Metabolism in Patients with Idiopathic Intracranial
- 42 Hypertension: A Link between 11 $\beta$ -HSD1 and Intracranial Pressure Regulation? *J Clin*
- 43 *Endocrinol Metab*
- 44
- 45
- 46
- 47
- 48
- 49
- 50
- 51
- 52
- 53
- 54
- 55
- 56
- 57
- 58
- 59
- 60

18-02-2011

- 1  
2  
3  
4 22. Skau M, Goetze JP, Rehfeld JF, Jensen R (2010) Natriuretic pro-peptides in idiopathic  
5 intracranial hypertension. *Regul Pept* 164:71-77  
6  
7  
8 23. Skau M, Sander B, Milea D, Jensen R (2010) Disease activity in idiopathic intracranial  
9 hypertension: a 3-month follow-up study. *J Neurol*  
10  
11  
12 24. Sorensen PS, Thomsen AM, Gjerris F (1986) Persistent disturbances of cognitive functions in  
13 patients with pseudotumor cerebri. *Acta Neurol Scand* 73:264-268  
14  
15  
16 25. Sugerman HJ, Felton WL, III, Salvant JB, Jr., Sismanis A, Kellum JM (1995) Effects of  
17 surgically induced weight loss on idiopathic intracranial hypertension in morbid obesity.  
18 *Neurology* 45:1655-1659  
19  
20  
21 26. Sweet JJ (1983) confounding effects of depression on neuropsychological testing: five  
22 illustrative cases. *Clinical Neuropsychology* V:103-109  
23  
24  
25 27. Wall M, George D (1991) Idiopathic intracranial hypertension. A prospective study of 50  
26 patients. *Brain* 114 ( Pt 1A):155-180  
27  
28  
29 28. Wong R, Madill SA, Pandey P, Riordan-Eva P (2007) Idiopathic intracranial hypertension:  
30 the association between weight loss and the requirement for systemic treatment. *BMC*  
31 *Ophthalmol* 7:15  
32  
33  
34  
35  
36  
37  
38 29. Yri H, Wegener M, Jensen R. Idiopathic intracranial hypertension, relapse rate and clinical long  
39 tern outcome. Endnu ikke publiceret  
40  
41  
42  
43  
44  
45  
46  
47  
48  
49  
50  
51  
52  
53  
54  
55  
56  
57  
58  
59  
60



**Idiopathic intracranial hypertension is associated with cognitive dysfunction — a prospective case-control study**

|                                 |                                                                                                                                                                                                                                                                                                                                                                                                                                                        |
|---------------------------------|--------------------------------------------------------------------------------------------------------------------------------------------------------------------------------------------------------------------------------------------------------------------------------------------------------------------------------------------------------------------------------------------------------------------------------------------------------|
| Journal:                        | <i>BMJ Open</i>                                                                                                                                                                                                                                                                                                                                                                                                                                        |
| Manuscript ID:                  | bmjopen-2013-004376.R1                                                                                                                                                                                                                                                                                                                                                                                                                                 |
| Article Type:                   | Research                                                                                                                                                                                                                                                                                                                                                                                                                                               |
| Date Submitted by the Author:   | 24-Jan-2014                                                                                                                                                                                                                                                                                                                                                                                                                                            |
| Complete List of Authors:       | Yri, Hanne; Danish Headache Centre, Department of Neurology, Glostrup Hospital, University of Copenhagen<br>Fagerlund, Birgitte; Center for Neuropsychiatric Schizophrenia Research, Psychiatric Center Glostrup, University of Copenhagen<br>Forchhammer, Hysse; Department of Neurology, Glostrup Hospital, University of Copenhagen<br>Jensen, Rigmor; Danish Headache Centre, Department of Neurology, Glostrup Hospital, University of Copenhagen |
| <b>Primary Subject Heading</b>: | Neurology                                                                                                                                                                                                                                                                                                                                                                                                                                              |
| Secondary Subject Heading:      | Neurology                                                                                                                                                                                                                                                                                                                                                                                                                                              |
| Keywords:                       | MENTAL HEALTH, Adult neurology < NEUROLOGY, Neuro-ophthalmology < NEUROLOGY                                                                                                                                                                                                                                                                                                                                                                            |
|                                 |                                                                                                                                                                                                                                                                                                                                                                                                                                                        |

SCHOLARONE™  
Manuscripts

1  
2  
3  
4 Idiopathic intracranial hypertension is associated with cognitive  
5  
6  
7 dysfunction — a prospective case-control study  
8  
9

10 Hanne Maria Yri MD<sup>1</sup>, Birgitte Fagerlund MA, PhD<sup>2</sup>, Hysse Birgitte Forchhammer MA, PhD<sup>3</sup>,  
11 Rigmor Højland Jensen MD, Dr Med Sci<sup>1</sup>  
12  
13

- 14  
15 1. Danish Headache Center, Department of Neurology, Glostrup Hospital, University of  
16 Copenhagen, Denmark.  
17  
18 2. Center for Neuropsychiatric Schizophrenia Research, Psychiatric Center Glostrup, University  
19 of Copenhagen, Denmark  
20  
21 3. Department of Neurology, Glostrup Hospital, University of Copenhagen, Denmark  
22  
23  
24

25  
26 **CORRESPONDING AUTHOR**

27 Rigmor Højland Jensen, Danish Headache Center, Department of Neurology, Glostrup Hospital,  
28 Ndr. Ringvej 69, 2600 Glostrup, Denmark. E-mail: rigmor.jensen@regionh.dk.  
29  
30 Telephone: +45 38 63 30 59. Fax: +45 38 63 30 71  
31  
32  
33  
34  
35

36  
37 **KEY WORDS**

38 Idiopathic intracranial hypertension, pseudotumor cerebri, cognition disorders, case-control studies.  
39  
40  
41  
42

43 **WORD COUNT:** 3172

44  
45 **NUMBER OF REFERENCES:** 32  
46  
47  
48  
49  
50  
51  
52  
53  
54  
55  
56  
57  
58  
59  
60

## ABSTRACT

**Objective:** To explore the extent and nature of cognitive deficits in patients with idiopathic intracranial hypertension at time of diagnosis and after three months of treatment.

**Design:** Prospective case-control study.

**Setting:** Neurological department, ophthalmological department and a tertiary headache referral clinic at a Danish university hospital.

**Participants:** Thirty-one patients with definite idiopathic intracranial hypertension referred from June 2011– February 2013 and included within one week of diagnostic intracranial pressure measurement. Twenty-nine patients completed re-examined at the 3-month follow-up. At time of testing none of the patients took medication potentially affecting cognitive function. Controls were 31 healthy age- and sex-matched volunteers from the local community.

**Outcome measures:** Executive function, working memory, visuospatial memory, processing speed, attention, and reaction time assessed by a comprehensive neuropsychological test battery consisting of validated computerized (Cambridge Neuropsychological Test Automated Battery (CANTAB)) and paper-and-pencil tests.

**Results:** Patients with idiopathic intracranial hypertension performed significantly worse than controls in four of six cognitive domains ( $p \leq 0.02$ ). Deficits were most pronounced in reaction time (1.45 SD below controls 95% CI 2.10 to 0.85) and processing speed (1.45 SD below controls 95% CI 2.08 to 0.81). Despite marked improvement in intracranial pressure and headache, re-examination showed persistent cognitive dysfunction three months after diagnosis and start of treatment.

**Conclusions:** We demonstrate for the first time in a well-defined cohort of patients that idiopathic intracranial hypertension may be associated with cognitive dysfunction. This could explain the functional disability of patients with idiopathic intracranial hypertension. A focused

1  
2  
3  
4 multidisciplinary approach including neuropsychological rehabilitation therefore might be relevant in  
5  
6 the treatment of patients with idiopathic intracranial hypertension.  
7  
8  
9

## 10 11 **ARTICLE SUMMARY**

### 12 13 **Strengths and limitations of this study**

- 14  
15 • The first study to assess a broad range of cognitive functions in more than 10 patients
- 16  
17 • Prospective controlled design and a well defined study population
- 18  
19 • Controls were matched for age, sex and pre-morbid intelligence and in comparisons of  
20  
21 cognitive measures we adjusted for education and headache at time of testing.
- 22  
23 • The study was non-blinded and controls were not matched for Body Mass Index (BMI)
- 24  
25 • Cognitive assessment by an automated computerized test battery reduced the influence of the  
26  
27 non-blinded observer  
28  
29  
30  
31  
32  
33  
34  
35  
36  
37  
38  
39  
40  
41  
42  
43  
44  
45  
46  
47  
48  
49  
50  
51  
52  
53  
54  
55  
56  
57  
58  
59  
60

## INTRODUCTION

Due to predilection for young individuals of working age idiopathic intracranial hypertension (IIH) is a condition with substantial socioeconomic consequences. In USA alone the estimated annual costs exceed \$444 million (> \$17,000 /patient).<sup>1</sup> In addition to direct medical cost the major expenses was loss of wages caused by patients having to give up work or change profession due to IIH. Loss of income due to IIH is reported by 48% of patients,<sup>1</sup> but the exact cause of this substantial disability is yet unknown.

Despite obvious threat to visual function compliance with long-term treatment is often poor. In our clinics we experience a substantial lack of initiative and self-awareness in patients with IIH which has raised the suspicion of prefrontal dysfunction. However, while numerous studies describe the visual and headache-related complications of IIH, very little is known about the cognitive implications of the disease. Except for a single memory test conducted in 85 patients<sup>2</sup> the cognitive function in IIH has only been tested in a few very small study populations.<sup>3-5</sup> In all studies, apart from the case-report by Kaplan et al.,<sup>5</sup> testing revealed significant cognitive deficits in patients with IIH. Especially within verbal tests and memory deficits have been demonstrated.

The aim of this case-control study is to explore in details the extent and nature of cognitive deficits in patients with IIH at time of diagnosis and after three months of treatment.

## METHODS

### Subjects

We recruited 31 consecutive patients with IIH referred to the Department of Neuro-Ophthalmology, the Department of Neurology or the Danish Headache Center, Glostrup Hospital from June 2011–February 2013. Sample size was determined by the number of cases referred in the inclusion period. Twenty-eight of the patients were newly diagnosed with IIH, three patients had well-defined relapse



1  
2  
3  
4 of IHH after a minimum of 10 months (range 10-26 months) of medication-free remission (resolved  
5 headache and papilledema). All patients had definite IHH according to the diagnostic criteria.<sup>6,7</sup> We  
6 included only patients that could be tested within seven days of confirmed diagnosis. Exclusion  
7 criteria were: other disorders or medication that could potentially affect cognition, decreased visual  
8 acuity, or language skills (Danish) deemed insufficient for participation in the cognitive assessment.  
9  
10 Thirty-one healthy and headache free (defined as less than 4 headache days/month) controls,  
11  
12 matched for age and sex, were recruited by advertising at Glostrup Hospital and on the website  
13 forsogspersonen.dk. Healthy controls were tested only once and did not have a lumbar puncture  
14 performed. Otherwise the cognitive examination program for patients and controls was identical.  
15  
16  
17  
18  
19  
20  
21  
22  
23  
24  
25

#### 26 **Standard protocol approvals, registration and patients consents**

27  
28 All participants gave written, informed consent to participate in the study. The study was conducted  
29 in accordance with the declaration of Helsinki and approved by the Regional Ethics Committee.  
30  
31  
32  
33  
34

#### 35 **General examination**

36  
37 At time of diagnosis patients underwent a complete neurological examination including MR/CT-  
38 imaging with venous sequences. All but one patient underwent thorough standardized neuro-  
39 ophthalmological examination.<sup>8</sup> The remaining patient did not participate in the neuro-  
40 ophthalmological evaluation in spite of numerous invitations. A general ophthalmological  
41 examination was, however, performed at the local referring ophthalmological department.  
42  
43  
44  
45  
46  
47  
48  
49  
50  
51  
52  
53  
54  
55  
56  
57  
58  
59  
60

## Treatment

After diagnostic lumbar puncture and after cognitive testing was completed, treatment with acetazolamide was initiated. From baseline to 3-month follow-up doses were individually adjusted at doses of 750-2225 mg/day. Due to intolerable side effects acetazolamide was replaced by topiramate, 125 mg/day in one patient. Treatment with acetazolamide and topiramate was paused respectively three and seven days before the 3-month follow-up examinations.

Infrequent (<14 days/month) use of simple analgesics (paracetamol and/or acetylsalicylic acid) was allowed. Treatment did not include use of opiate analgesics or tranquilizers.

Weight-loss was strongly recommended and patients were offered dietician consultations.

## ICP

ICP was measured at baseline and at the 3-month follow-up. In one patient ICP was measured by direct intracranial pressure monitoring. In the remaining patients (n=30) ICP was measured by standardized lumbar puncture manometry. Patients were placed in lateral decubital position, had their legs straightened and were given a minimum of 10 min to relax before a stabilized pressure was recorded.

## Cognitive testing

We assessed cognitive function by a neuropsychological test battery of validated computerized (Cambridge Neuropsychological Test Automated Battery (CANTAB))<sup>9</sup> and paper-and-pencil tests.

Paper-and-pencil tests: (a) **Rey – Osterreith's Complex Figure Test**, testing visuospatial memory; (b) **Trail Making Test A and B**, primarily testing psychomotor speed; (c) **Symbol Digit Modalities Test**, testing psychomotor speed; (d) **Verbal Fluency Test**, testing verbal semantic and phonological

1  
2  
3  
4 fluency. The letters “S” and “A” and the categories “animals” and “items in a supermarket” were  
5  
6 used.

7  
8 CANTAB computerized tests: (e) **Motor screening test** to familiarize subjects with the touch screen;  
9  
10 (f) **Spatial Span**, assessing visuospatial working memory span; (g) **Spatial Working Memory**,  
11  
12 testing the ability to retain and manipulate spatial information in working memory; (h) **Stockings of**  
13  
14 **Cambridge**, assessing spatial planning ability; (i) **Intra-Extra Dimensional Set Shift**, testing  
15  
16 cognitive flexibility, requiring the formation and shifting of attentional set; (j) **Reaction Time**,  
17  
18 assessing motor and reaction time latencies; (k) **Rapid Visual Information Processing**, testing  
19  
20 sustained attention with a working memory load.  
21  
22

23  
24 The **Danish Adult Reading Test** (Danish version of the National Adult Reading Test) was applied  
25  
26 as an estimate of premorbid intelligence.<sup>10</sup>  
27

28  
29 The test battery was administered in a fixed order by the same physician (HY), instructed and trained  
30  
31 by experienced neuro-psychologists (HF, BF). To ensure uniform test instructions we used a written  
32  
33 instruction-manual during all sessions. Headache intensity at time of testing was recorded by a 10-  
34  
35 point Visual Analogue Scale (VAS). Patients were re-tested at the 3-month follow-up.  
36  
37

### 38 39 **Statistical analysis**

40  
41 Statistical analyses were conducted using SAS 9.3. Significance levels were set at 0.05. Non-normal  
42  
43 distributed data were logarithmically transformed to reduce skewness. Categorical data were  
44  
45 investigated by Chi-square test, Fishers’ exact test and McNemar test.  
46  
47

48  
49 Test-scores of patients and healthy controls were compared using a linear mixed model adjusting for  
50  
51 education and headache at time of testing. Changes in patient test-scores from baseline to follow-up  
52  
53 were analyzed in a linear mixed model for paired data adjusting for headache at time of testing. Test  
54  
55 performance in patients with normalized ICP at follow-up and patient with continuous elevated ICP  
56  
57  
58  
59  
60

1  
2  
3  
4 was compared in a mixed model using ICP  $\leq 25$  cmH<sub>2</sub>O and ICP  $< 25$  cmH<sub>2</sub>O as a binary categorical  
5  
6 variable. In addition the effect of ICP change (as a continuous variable) on difference in test  
7  
8 performance from baseline to follow-up was analyzed.  
9

10 The effects of depression and chronic pain on cognitive performance were explored within the  
11  
12 patient group in a model comparing subjects with or without these traits, adjusting for education and  
13  
14 headache at time of testing. The effect of BMI was explored in a similar model with BMI as a  
15  
16 continuous variable.  
17

18 To avoid effects of multiple comparisons in the analyses of cognitive function, the analyses were  
19  
20 performed in mixed linear models including all 19 subtest scores into the same model.  
21  
22

23 For comparability of test-scores and evaluation of effect sizes, test-scores were standardized into z-  
24  
25 scores. Z-scores were based on performance of the healthy controls which by definition had a mean  
26  
27 scale score of zero and SD set to one. All scales were computed so that a higher z-score indicate  
28  
29 better performance.  
30  
31

32 We used standardized test-scores to create composite domain scores, calculated by grouping selected  
33  
34 tests, based on which cognitive domain they theoretically represented. Z-scores for cognitive  
35  
36 domains were averaged and re-standardized based on the composite domain average and standard  
37  
38 deviation of healthy controls.  
39  
40

41 Although they spoke Danish fluently, Trail Making Test scores and Verbal Fluency scores from non-  
42  
43 native Danish speakers (n=2) were omitted from statistical analysis as these test are potentially  
44  
45 influenced by language-fluency and familiarity with the Latin alphabet. In domain construction the  
46  
47 average of the remaining tests was used to determine the domain score.  
48  
49  
50  
51  
52  
53  
54  
55  
56  
57  
58  
59  
60

## RESULTS

### Demographics and clinical characteristics at baseline

Patients and healthy controls did not differ in demographics, household income, educational level or premorbid intelligence level (Table 1). However, patient had significantly higher BMI and slightly less education counted in years than healthy controls.

Headache at the time of testing was reported by the majority of patients, but by none of the controls (Table 1). General headache disability in patients was heterogeneous. Ten patients fulfilled the criteria of chronic headache ( $\geq 15$  days/month for 3 months)<sup>7</sup>, four patients had frequent headache (mean 7.7 days/month)<sup>7</sup>, seven had infrequent headache ( $< 1$  day /month)<sup>7</sup>, 14 had only had headache in the weeks up until diagnosis and four patient had no headache at all. Healthy controls reported infrequent headaches with a mean frequency at 0.5 days/month.

Visual fields (Automated perimetry, Humphrey 30-2) were bilaterally normal in 14 patients and normal in at least one eye in another eight patients. Seven patients had mild bilateral peripheral defects. One patient had bilateral concentric defects with remaining 15-20 central degrees of vision. In the cognitive tests this patient performed equally to the average patient. No photophobia or visual disturbances were reported during testing.

Depression (explicitly specified in the standardized interview) was reported by 8 (26%). Other comorbidities included tension-type headache (n=12), migraine (n=7), diabetes (n=2), hypertension (n=2), inflammatory bowel disease (n=2), mild personality disorder (n=1), asthma (n=1), fibromyalgia (n=1), small pineal gland cyst (n=1)(asymptomatic, discovered on routine MR at time of IHH-diagnosis), sequela after monocular central serous chorioretinopathy (n=1), intermittent claudication (n=1), lumbar disc herniation (n=1).

Twenty-two patients were on either short term (n=18) or long-term sick-leave (n=4), five were unemployed and three had retired from work for reasons other than IHH.

**Table 1. Demographics and clinical characteristics for IHH patients at baseline and at follow-up and healthy controls**

|                                                                        | IHH Baseline<br>n=31 | IHH Follow-up<br>n=29 | Controls<br>n=31 | Statistics       |                  |
|------------------------------------------------------------------------|----------------------|-----------------------|------------------|------------------|------------------|
|                                                                        |                      |                       |                  | p <sup>d</sup>   | p <sup>e</sup>   |
| <b>Demographics</b>                                                    |                      |                       |                  |                  |                  |
| Age (SD), <i>years</i>                                                 | 31.0 (11.2)          |                       | 30.7 (11.2)      | 0.91             |                  |
| Gender, <i>f/m</i>                                                     | 31/0                 |                       | 31/0             |                  |                  |
| Danish Adult Reading Test (SD), <i>words</i>                           | 22.9 (6.8)           |                       | 24.8 (5.3)       | 0.15             |                  |
| Education (SD), <i>years</i>                                           | 11.2 (2.2)           |                       | 12.8 (2.1)       | <b>0.001</b>     |                  |
| <u>Educational level</u>                                               |                      |                       |                  |                  | 0.38             |
| Long cycle higher ( $\geq 5$ years), <i>n</i>                          | 0                    |                       | 3                |                  |                  |
| Medium cycle higher (3–5 years), <i>n</i>                              | 4                    |                       | 7                |                  |                  |
| Short cycle higher (<3 years), <i>n</i>                                | 4                    |                       | 4                |                  |                  |
| Vocational upper- secondary, <i>n</i>                                  | 5                    |                       | 3                |                  |                  |
| Student, <i>n</i>                                                      | 10                   |                       | 10               |                  |                  |
| No education, <i>n</i>                                                 | 8                    |                       | 4                |                  |                  |
| <u>Household income</u>                                                |                      |                       |                  |                  | 0.81             |
| High (>DKK 400,000/year), <i>n</i>                                     | 10                   |                       | 8                |                  |                  |
| Middle (DKK 200-400,000/year), <i>n</i>                                | 12                   |                       | 12               |                  |                  |
| Low (<DKK 200,000/year), <i>n</i>                                      | 9                    |                       | 11               |                  |                  |
| <b>Clinical Characteristics</b>                                        |                      |                       |                  |                  |                  |
| BMI (SD), <i>kg/m<sup>2</sup></i>                                      | 35.7 (6.2)           | 34.0 (6.0)            | 23.6 (4.0)       | <b>&lt;0.001</b> | <b>0.009</b>     |
| Headache at time of testing, <i>n (%)</i>                              | 22 (71)              | 14 (48)               | 0                |                  |                  |
| Mean headache intensity (SD), <i>VAS</i>                               | 2.64 (2.3)           | 1.84 (2.4)            |                  |                  | <b>0.01</b>      |
| ICP $\leftrightarrow$ cognitive testing <sup>a</sup> (SD), <i>days</i> | 3 (2.4)              | 1 (1.6)               |                  |                  |                  |
| Mean ICP <sup>b</sup> (SD), <i>cmH<sub>2</sub>O</i>                    | 41.0 (12.6)          | 25.9 (5.5)            |                  |                  | <b>&lt;0.001</b> |
| Memory difficulties <sup>c</sup> , <i>n (%)</i>                        | 17 (55)              | 18 (62)               |                  |                  | 0.42             |

|                                                        |            |         |      |
|--------------------------------------------------------|------------|---------|------|
| Concentration difficulties <sup>c</sup> , <i>n</i> (%) | 20 (65)    | 15 (52) | 0.18 |
| Duration of IHH symptoms (SD), <i>months</i>           | 4.34 (5.4) |         |      |

Chi-square test was used for household income, Fishers' exact test for educational level and McNemars' test for paired categorical variables. 2-tailed T-test was used for numerical variables. Significant p-values are printed in bold. <sup>a</sup>Time-span between ICP measurement and cognitive testing. <sup>b</sup>ICP measured with intracranial pressure monitor (n=1) not included. <sup>c</sup>Subjective difficulties reported by the patients. <sup>p<sup>d</sup></sup>: difference between patients at baseline and healthy controls. <sup>p<sup>e</sup></sup>: difference between patients at baseline and follow-up.

### Cognitive function in patients at baseline

IHH-patients performed significantly worse than controls in four of six cognitive domains and in 13 of 19 subtests (Table 2). The most pronounced deficits were found in the domains of processing speed and reaction time (Figure 1). Even though deficits in executive functions only reached trend levels of significance patients scored significantly worse in the subtest measuring cognitive flexibility (ID/ED errors). Likewise, patients performed significantly worse in the subtest measuring spatial working memory strategy although no overall deficits in working memory was found. Sub-analyses within the patients group showed no difference between patients with or without depression or with or without chronic headache. Performance in cognitive tests within the patient group did was not related to BMI (ranging from 24.2 – 48.8 kg/m<sup>2</sup>).

**Table 2. Cognitive test scores and composite domain scores at baseline compared to healthy controls**

| Test Variables                              | Raw-scores           |                          | Z-scores and statistics |             |                   |
|---------------------------------------------|----------------------|--------------------------|-------------------------|-------------|-------------------|
|                                             | IIH Baseline<br>n=31 | Healthy Controls<br>n=31 | Z                       | 95% CL      | p                 |
| <b><u>Executive function</u></b>            |                      |                          | -0.61                   | -1.25;0.02  | 0.059             |
| <b>Intra-Extra Dimensional</b>              |                      |                          |                         |             |                   |
| <b>Set Shift</b>                            |                      |                          |                         |             |                   |
| ID/ED Errors <sup>log</sup>                 | 8.1 (0-32)           | 4.0 (0-25)               | -0.94                   | -1.54;-0.35 | <b>0.002</b>      |
| Total errors adjusted <sup>log</sup> , s    | 20.9 (7-177)         | 12.2 (7-55)              | -0.91                   | -1.50;-0.32 | <b>0.003</b>      |
| <b>Stockings of Cambridge</b>               |                      |                          |                         |             |                   |
| Solved in minimum moves                     | 9.61 (2.0)           | 10.19 (1.7)              | -0.28                   | -0.87;0.31  | 0.31              |
| Initial thinking time <sup>log</sup> , s    | 6.5 (2.0-18.3)       | 8.2 (3.1-40.7)           | 0.49                    | -0.11;1.08  | 0.11              |
| Subsequent thinking time <sup>log</sup> , s | 0.013 (0-3.7)        | 0.011 (0-3.0)            | 0.09                    | -0.51;0.68  | 0.77              |
| <b>Trail Making Test<sup>a</sup></b>        |                      |                          |                         |             |                   |
| Trail Making B-A <sup>log</sup> , s         | 39.2 (14.7-101.1)    | 30.62 (16.3-98.4)        | -0.56                   | -1.10;0.09  | 0.07              |
| <b><u>Working memory</u></b>                |                      |                          | -0.56                   | -1.19;0.08  | 0.08              |
| <b>Spatial Working Memory</b>               |                      |                          |                         |             |                   |
| Strategy score <sup>log</sup>               | 29.9 (20-42)         | 24.8 (19-40)             | -0.75                   | -1.35;-0.16 | <b>0.01</b>       |
| Total errors <sup>log</sup>                 | 10.2 (0-79)          | 4.7 (0-70)               | -0.48                   | -1.07;0.12  | 0.11              |
| <b>Spatial Span:</b>                        |                      |                          |                         |             |                   |
| Span length                                 | 6.4 (1.3)            | 7.0 (1.4)                | -0.31                   | -0.90;0.28  | 0.31              |
| <b><u>Processing speed</u></b>              |                      |                          | -1.45                   | -2.08;-0.81 | <b>&lt;0.0001</b> |
| <b>Verbal Fluency<sup>a</sup></b>           |                      |                          |                         |             |                   |
| Letters                                     | 19.4 (7.0)           | 30.3 (8.3)               | -1.25                   | -1.84;-0.65 | <b>&lt;0.0001</b> |
| Categories                                  | 39.8 (9.9)           | 55.5 (12.3)              | -1.21                   | -1.81;-0.61 | <b>&lt;0.0001</b> |



**Trail Making Test<sup>a</sup>**

|                                   |                  |                  |       |             |             |
|-----------------------------------|------------------|------------------|-------|-------------|-------------|
| Trail Making A <sup>log</sup> , s | 31.5 (18.0-68.1) | 25.2 (12.8-51.4) | -0.63 | -1.22;-0.02 | <b>0.04</b> |
|-----------------------------------|------------------|------------------|-------|-------------|-------------|

|                                   |                   |                   |       |             |             |
|-----------------------------------|-------------------|-------------------|-------|-------------|-------------|
| Trail Making B <sup>log</sup> , s | 73.5 (40.9-169.2) | 52.2 (31.2-131.1) | -0.66 | -1.26;-0.07 | <b>0.02</b> |
|-----------------------------------|-------------------|-------------------|-------|-------------|-------------|

**Symbol Digit Modalities**

|                 |             |            |       |             |               |
|-----------------|-------------|------------|-------|-------------|---------------|
| Correct symbols | 47.8 (10.2) | 58.7 (9.0) | -1.09 | -1.68;-0.49 | <b>0.0003</b> |
|-----------------|-------------|------------|-------|-------------|---------------|

**Visuospatial memory**

|  |  |  |       |             |             |
|--|--|--|-------|-------------|-------------|
|  |  |  | -0.74 | -1.32;-0.05 | <b>0.02</b> |
|--|--|--|-------|-------------|-------------|

**Rey-Osterreith Figure**

|                         |            |            |       |             |             |
|-------------------------|------------|------------|-------|-------------|-------------|
| Immediate recall, score | 24.5 (5.4) | 28.0 (4.3) | -0.67 | -1.26;-0.08 | <b>0.03</b> |
|-------------------------|------------|------------|-------|-------------|-------------|

|                       |            |            |       |             |              |
|-----------------------|------------|------------|-------|-------------|--------------|
| Delayed recall, score | 23.8 (5.0) | 28.0 (4.4) | -0.83 | -1.42;-0.24 | <b>0.006</b> |
|-----------------------|------------|------------|-------|-------------|--------------|

**Attention****Rapid Visual Processing**

|                          |           |            |       |             |             |
|--------------------------|-----------|------------|-------|-------------|-------------|
| A' sensitivity to target | 0.9 (0.1) | 0.93 (0.1) | -0.70 | -1.30;-0.11 | <b>0.01</b> |
|--------------------------|-----------|------------|-------|-------------|-------------|

**Reaction time**

|  |  |  |       |             |                   |
|--|--|--|-------|-------------|-------------------|
|  |  |  | -1.48 | -2.10;-0.85 | <b>&lt;0.0001</b> |
|--|--|--|-------|-------------|-------------------|

**Reaction Time:**

|                              |                     |                     |       |             |                   |
|------------------------------|---------------------|---------------------|-------|-------------|-------------------|
| Reaction <sup>log</sup> , ms | 409.4 (264.9-988.6) | 330.0 (247.6-464.1) | -1.81 | -2.40;-1.22 | <b>&lt;0.0001</b> |
|------------------------------|---------------------|---------------------|-------|-------------|-------------------|

|              |              |              |       |             |              |
|--------------|--------------|--------------|-------|-------------|--------------|
| Movement, ms | 417.8 (86.3) | 338.3 (80.1) | -0.84 | -1.43;-0.25 | <b>0.006</b> |
|--------------|--------------|--------------|-------|-------------|--------------|

---

Normally distributed raw-score variables are shown as mean (SD). Logarithmically transformed variables<sup>log</sup> are shown as arithmetic mean (range). Z-scores and test statistics are given in estimates from a linear mixed model adjusting for education and headache at time of testing and multiple testing. Significant p-values are printed in bold. <sup>a</sup>n=29, as Trail Making Test scores and Verbal Fluency scores from non-native Danish speakers (n=2) were omitted from analysis.

### Clinical characteristics at follow-up

In spite of several invitations to attend a follow-up examination two patients dropped out from baseline to follow-up. Clinical characteristics and baseline test-scores in these 2 patients did not differ from the rest of the patient group.

Twenty-nine patients were reexamined at the 3-month follow-up. One patient refused to have lumbar puncture performed at follow-up. A normalized ICP was found in 14 of the remaining 28 patients.

Less than half of the patients had headache during cognitive re-testing (Table 1). Visual fields were either stable or had improved from baseline.

Fourteen of 31 patients had resumed work/school, 11 patients were now on long-term sick-leave, one patient had reduced and altered work schedule due to IHH and two patients were unemployed.

### Cognitive function at follow-up

After 3-months of treatment statistical significant improvement was detected in two domains (Table 3). Attention scores (RVP A') had practically normalized while performance in visuospatial memory tests improved to a level above performance in healthy controls.

No overall change was detected in the domains of executive function, working memory, processing speed and reaction time (Figure 2). Patients in which ICP had normalized ( $<25$  cmH<sub>2</sub>O) did not perform better than patients in which elevated ICP persisted (ICP $>25$  cmH<sub>2</sub>O) and performance was not significantly associated with intensity or presence/absence of headache during the test. No correlation was found between change in cognitive performance and difference in ICP from baseline.

**Table 3. Cognitive test scores and composite domain scores at follow-up compared to baseline**

| Test Variables                              | Raw-scores        |                 | Z-scores and statistics |             |              |
|---------------------------------------------|-------------------|-----------------|-------------------------|-------------|--------------|
|                                             | IIH Baseline      | IIH Follow-up   | Z <sup>b</sup>          | 95% CL      | p            |
|                                             | n=31              | n=29            |                         |             |              |
| <b><u>Executive function</u></b>            |                   |                 | -0.18                   | -0.77;0.42  | 0.16         |
| <b>Intra-Extra Dimensional</b>              |                   |                 |                         |             |              |
| <b>Set Shift</b>                            |                   |                 |                         |             |              |
| ID/ED Errors <sup>log</sup>                 | 8.1 (0–32)        | 5.8 (1–32)      | -0.82                   | -1.40;-0.25 | 0.77         |
| Total errors adjusted <sup>log</sup> , s    | 20.9 (7–177)      | 14.4 (7–68)     | -0.56                   | -1.14;0.01  | 0.26         |
| <b>Stockings of Cambridge</b>               |                   |                 |                         |             |              |
| Solved in minimum moves                     | 9.61 (2.0)        | 19.9 (2.0)      | -0.08                   | -0.66;0.49  | 0.55         |
| Initial thinking time <sup>log</sup> , s    | 6.5 (2.0–18.3)    | 6.7 (2.5–18.4)  | 0.45                    | -0.14;1.02  | 0.98         |
| Subsequent thinking time <sup>log</sup> , s | 0.013 (0–3.7)     | 0.013 (0–3.7)   | 0.11                    | -0.47;0.68  | 0.85         |
| <b>Trail Making Test<sup>a</sup></b>        |                   |                 |                         |             |              |
| Trail Making B-A <sup>log</sup> , s         | 39.2 (14.7–101.1) | 33.1 (1.3–79.5) | 0.46                    | -0.12;1.05  | <b>0.002</b> |
| <b><u>Working memory</u></b>                |                   |                 | -0.33                   | -0.84;0.18  | 0.44         |
| <b>Spatial Working Memory</b>               |                   |                 |                         |             |              |
| Strategy score <sup>log</sup>               | 29.9 (20-42)      | 27.9 (19–42)    | -0.24                   | -0.81;0.34  | 0.10         |
| Total errors <sup>log</sup>                 | 10.2 (0–79)       | 10.1 (0–61)     | -0.24                   | -0.81;0.34  | 0.50         |
| <b>Spatial Span:</b>                        |                   |                 |                         |             |              |
| Span length                                 | 6.4 (1.3)         | 6.4 (1.3)       | -0.27                   | -0.85;0.31  | 0.96         |
| <b><u>Processing speed</u></b>              |                   |                 | -1.23                   | -1.83;-0.64 | 0.49         |
| <b>Verbal Fluency<sup>a</sup></b>           |                   |                 |                         |             |              |
| Letters                                     | 19.4 (7.0)        | 18.6 (6.6)      | -1.27                   | -1.86;-0.69 | 0.88         |
| Categories                                  | 39.8 (9.9)        | 42.5 (10.8)     | -0.93                   | -1.51;-0.34 | 0.41         |

| <b>Trail Making Test<sup>a</sup></b> |                     |                     |       |             |               |
|--------------------------------------|---------------------|---------------------|-------|-------------|---------------|
| Trail Making A <sup>log</sup> , s    | 31.5 (18.0–68.1)    | 32.9 (9.8)          | -0.56 | -1.15;0.02  | 0.95          |
| Trail Making B <sup>log</sup> , s    | 73.5 (40.9–169.2)   | 66.1 (38.7–125.4)   | -0.18 | -0.79;0.40  | 0.16          |
| <b>Symbol Digit Modalities</b>       |                     |                     |       |             |               |
| Correct symbols                      | 47.8 (10.2)         | 49.1 (12.3)         | -0.91 | -1.49;-0.33 | 0.50          |
| <b><u>Visuospatial memory</u></b>    |                     |                     | 0.39  | -0.17;1.02  | <b>0.0005</b> |
| <b>Rey-Osterreith Figure</b>         |                     |                     |       |             |               |
| Immediate recall, score              | 24.5 (5.4)          | 28.9 (4.1)          | 0.36  | -0.22;0.93  | <b>0.002</b>  |
| Delayed recall, score                | 23.8 (5.0)          | 28.8 (3.8)          | 0.31  | -0.26;0.89  | <b>0.0002</b> |
| <b><u>Attention</u></b>              |                     |                     |       |             |               |
| <b>Rapid Visual Processing</b>       |                     |                     |       |             |               |
| A' sensitivity to target             | 0.9 (0.1)           | 0.92 (0.04)         | -0.14 | -0.71;0.43  | <b>0.03</b>   |
| <b><u>Reaction time</u></b>          |                     |                     | -1.31 | -1.90;-0.71 | 0.90          |
| <b>Reaction Time:</b>                |                     |                     |       |             |               |
| Reaction <sup>log</sup> , ms         | 409.4 (264.9–988.6) | 387.4 (393.0–710.1) | -1.45 | -2.02;-0.88 | 0.68          |
| Movement, ms                         | 417.8 (86.3)        | 412.3 (72.1)        | -0.89 | -1.46;-0.31 | 0.32          |

Normally distributed raw-score variables are shown as mean (SD). Logarithmically transformed variables<sup>log</sup> are shown as arithmetic mean (range). Z-scores and test statistics are given in estimates from a linear mixed model adjusting for education and headache at time of testing and multiple testing. Significant p-values are printed in bold. <sup>a</sup>n=29, as Trail Making Test scores and Verbal Fluency scores from non-native Danish speakers (n=2) were omitted from analysis. <sup>b</sup>: Patients at follow-up compared to healthy controls.

## DISCUSSION

This study is the first to comprehensively explore the cognitive functions in a cohort of more than 10 patients with IHH. We examined 31 patients and found deficits in four of six cognitive domains suggesting that IHH is associated with a global cognitive dysfunction.

Cognitive function in IHH has only been reported in three studies<sup>2-4</sup> in addition to a single case-report<sup>5</sup>. One study<sup>2</sup> examined 85 patients but applied only a single memory test and the methodology was not described in details.. The remaining studies performed more extensive cognitive testing, but in contrast to our study were uncontrolled and included only respectively one, five and 10 patients<sup>3-5</sup> Prior studies were, in addition, based on patients with a wide range of disease duration (6-98 months) and only one study<sup>3</sup> reported ICP at time of testing. Our study is the first to assessed the cognitive function in a well-defined group of patients with newly diagnosed disease (n=29) or relapse (n=2).

While the case-study of Kaplan et al.<sup>5</sup> found no convincing cognitive deficits, Arseni et al.<sup>2</sup> and Kharkar et al.<sup>4</sup> reported substantial deficits in memory. We found deficits in visuospatial memory and in spatial working memory strategy, but detected no overall difference in working memory. Verbal memory (measured by Wecheler Memory Scale) was by far the most affected parameter in the study of Kharkar et al. and similarly was reported moderate to severe in 90% of the patients studied by Arseni et al. Although we did not test verbal memory we found significant deficits in other verbal functions (verbal fluency). This is in line with the study of Sorensen et al.<sup>3</sup> reporting verbal deficits in all of their five patients. Deficits in phonological fluency, which were substantial in our patients, have been shown to relate to frontal lobe damage, reflecting an additional executive component.<sup>11</sup>

1  
2  
3  
4 The most severe deficits in our study were found in the domains of reaction time and processing  
5 speed which is consistent with the study of Sorensen et al.<sup>3</sup> In addition we found significant  
6  
7  
8 impairment in cognitive flexibility. Cognitive flexibility is fundamental for effective decision-  
9  
10 making and the ability to learn and adapt to environmental changes, but has never been tested in  
11  
12 patients with IHH before.

14  
15 Although overall working memory was not affected in our study, patients did score significantly  
16  
17 worse in the working memory strategy. This may reflect an executive component consistent with  
18  
19 other executive deficits detected in our patients.

21  
22 The deficits we detected in the domains of reaction time, processing speed, visuospatial memory and  
23  
24 attention were equivalent to those found in patients with first episode schizophrenia.<sup>12</sup> In addition  
25  
26 deficits in cognitive flexibility were similar to those (measured by Wisconsin Card Sort, a task  
27  
28 conceptionally akin to the Intra-Extra Dimensional Set Shift Test) found in a meta-analysis of  
29  
30 patients with schizophrenia in general.<sup>13</sup> Verbal fluency in our patients was affected to the same  
31  
32 extents as reported for patients with schizophrenia<sup>13</sup> as well as patients with congenital  
33  
34 hydrocephalus.<sup>11</sup> Furthermore deficits in verbal phonological fluency and processing speed  
35  
36 (measured by Symbol Digit Modalities Test) were in the range found in patients with multiple  
37  
38 sclerosis.<sup>14-16</sup>

41  
42 Despite marked improvement in ICP and headache we found no convincing signs of overall  
43  
44 cognitive improvement at the 3- month follow-up as the improvement seen in the visuospatial tests  
45  
46 could be explained by test-retest effect (familiarization with the Rey Osterieith Complex Figure).  
47  
48 Sorensen et al.<sup>3</sup> reported that although signs of cognitive dysfunction were only minor, four of their  
49  
50 five patients were unable to manage work and/or everyday activities. In our study 12 of the 31  
51  
52 patients were either on long-term sick-leave or had reduced and altered work schedule due to IHH at  
53  
54 follow up three months after diagnosis. Short follow-up and co-existent headache-symptoms limit  
55  
56  
57  
58  
59  
60

1  
2  
3  
4 the interpretation of the socioeconomic impact of cognitive dysfunction demonstrated in our study.  
5  
6 However, in other well recognized diseases such as schizophrenia a robust relationship between  
7  
8 global and specific cognitive deficits and functional outcome has been consistently demonstrated.<sup>17,18</sup>  
9  
10 The cause of cognitive impairment in IIH remains speculative. Theories could involve dysfunction of  
11  
12 grey and/or white matter substance due to mechanical compression as proposed in normal pressure  
13  
14 hydrocephalus,<sup>11</sup> dysfunction related to axonal flow as in optic nerve swelling and dysfunction<sup>19</sup> or  
15  
16 release of cytotoxic substances as is seen in other conditions with cognitive decline.<sup>20</sup> Diffuse  
17  
18 cerebral edema has been suggested by some<sup>21,22</sup> but refused by others.<sup>23,24</sup> High resolution imaging  
19  
20 studies are still scarce, but as brain volume seems to be normal in IIH<sup>25</sup> we would expect any  
21  
22 structural change that could explain the cognitive deficits found in this study to be subtle. Further  
23  
24 high-resolution morphological imaging studies thus would be of great interest.  
25  
26  
27  
28 The strengths of the study is the prospective and controlled design, the broad range of cognitive tests,  
29  
30 a relatively large study population, and the use of a culturally blind and computerized test battery that  
31  
32 by automatic test conduction and score recording reduced the influence of the non-blinded observer.  
33  
34 In addition the study population was well defined with cognitive testing performed in close relation  
35  
36 to IIH diagnosis and ICP measurement. As patients were enrolled consecutively from both  
37  
38 neurological and ophthalmological departments our study population reflects representative IIH-  
39  
40 patients and not a selected group of cognitively symptomatic patients.  
41  
42  
43 We recognize limitations to our study. First, the design was the non-blinded design and we did not  
44  
45 perform retest of healthy controls. Secondly, the follow-up period was relatively short and may very  
46  
47 well explain why we, unlike others,<sup>3</sup> failed to demonstrate improvement in cognitive function. Most  
48  
49 importantly, although we adjusted for many of the most important confounders, our controls were  
50  
51 not matched for BMI, headache or history of depression. The effect of headache on cognitive  
52  
53 function has been debated,<sup>26-28</sup> but a recent comprehensive review concluded that there is no  
54  
55  
56  
57  
58  
59  
60

1  
2  
3  
4 evidence of cognitive dysfunction in patients with migraine in general.<sup>29</sup> On the other hand there  
5  
6 seems to be evidence that *chronic* pain is associated with mild cognitive impairment in selected  
7  
8 domains.<sup>30,31</sup> However, it is unclear if the cognitive impairment is attributed by the pain it self, or  
9  
10 more likely mediated by co-existent depression.<sup>32</sup> Headache was chronic in 10 (32%) of our patients  
11  
12 and depression was reported by eight (26%) patients. Neither depression nor chronic pain was  
13  
14 associated with poorer cognitive performance when compared within the patient group. BMI in our  
15  
16 patients ranged from normal to morbidly obese (24.2 – 48.8 kg/m<sup>2</sup>). Patients with higher BMI did not  
17  
18 perform worse than the less obese. It thus seems less likely that chronic pain, depression or obesity  
19  
20 account for our findings of impaired cognition, but we fully acknowledge that ideally we should have  
21  
22 included control group of obese patients with frequent headache in addition to the healthy subjects.  
23  
24 The wide range of factors potentially affecting performance in cognitive tests, and the great variation  
25  
26 within the patient group makes an ideal match very difficult to achieve. However, a feasible  
27  
28 approach in obtaining phenotypically similar controls could be to recruit subjects with suspected IIH,  
29  
30 but in which the diagnosis is declined after appropriate investigations.  
31  
32  
33

34  
35 In conclusions, this study strongly suggests that IIH is a disabling neurological disorder associated  
36  
37 with cognitive deficits. The results in addition indicate that the cognitive deficits are long-lasting, not  
38  
39 paralleling ICP and headache reduction, and are not sufficiently treated by diuretics and weight loss.  
40  
41 Contrary to our hypothesis executive and memory functions were only moderately affected.  
42  
43 Nevertheless we found substantial deficits in processing speed and reaction time which could explain  
44  
45 some of the difficulties that patients encounter in work and daily activities. A focused  
46  
47 multidisciplinary approach including neuropsychological rehabilitation therefore might be relevant in  
48  
49 the treatment of patients with IIH.  
50  
51  
52  
53  
54  
55  
56  
57  
58  
59  
60



## AKNOWLEDGEMENTS

We thank Winnie G. Nielsen, BA; Lene Elkjær, BA and especially Hanne Andresen, BA for tireless effort and technical assistance during data collection (ICP measurements). We thank neuro-ophthalmologists Marianne Wegener, MD and Steffen Hamann, MD, PhD for thorough neuro-ophthalmological examination and evaluation supporting the diagnosis of IHH in our patients.

## FUNDING

This work was supported by “Region Hovedstadens Forskningsfond” and “Fonden til Lægevidenskabens Fremme”, grant number 12-375. The funding sources had no role in the study design; in the collection, analysis and interpretation data; in the writing of the report; or in the decision to submit the paper for publication.

## AUTHOR CONTRIBUTION

**HMY** made a substantive intellectual contribute to the design of the study, acquisition, analysis and interpretation of the data, and the drafting and revision of the manuscript.

**BF** made a substantive intellectual contribute to the design of the study, the interpretation of the data and the revision of the manuscript.

**HBF** made a substantive intellectual contribute to the design of the study, the interpretation of the data and the revision of the manuscript.

**RHJ** made a substantive intellectual contribute to the conceptualization and design of the study, the interpretation of the data and the revision of the manuscript.

## COMPETING INTERESTS

1  
2  
3  
4 H. Yri has received honoraria for consultant work from Neurocore and a travel grant from Berlin-  
5  
6 Chemi Menarini. B. Fagerlund and H. Forchhammer report no disclosures. R. Jensen has received  
7  
8 honoraria for lectures and patient leaflets from MSD, Berlin-Chemie Menarini, ATI and Pfizer and  
9  
10 serves on medical advisory boards for LindeGas, ATI and Neurocore.  
11  
12  
13

#### 14 15 **DATA SHARING STATEMENT**

16  
17 No additional data are available  
18  
19

#### 20 21 22 **EXCLUSIVE LICENCE**

23  
24 The Corresponding Author has the right to grant on behalf of all authors and does grant on behalf of  
25  
26 all authors, an exclusive licence (or non-exclusive for UK Crown Employees) on a worldwide basis  
27  
28 to the BMJ Publishing Group Ltd, and its Licensees to permit this article (if accepted) to be  
29  
30 published in BMJ Open and any other BMJ PGL products and to exploit all subsidiary rights, as set  
31  
32 out in our licence  
33  
34  
35  
36  
37  
38  
39  
40  
41  
42  
43  
44  
45  
46  
47  
48  
49  
50  
51  
52  
53  
54  
55  
56  
57  
58  
59  
60

## REFERENCES

## Reference List

1. Friesner D, Rosenman R, Lobb BM, et al. Idiopathic intracranial hypertension in the USA: the role of obesity in establishing prevalence and healthcare costs. *Obes Rev* 2011;12:e372-e380.
2. Arseni C, Simoca I, Jipescu I, et al. Pseudotumor cerebri: risk factors, clinical course, prognostic criteria. *Rom J Neurol Psychiatry* 1992;30:115-132.
3. Sorensen PS, Thomsen AM, Gjerris F. Persistent disturbances of cognitive functions in patients with pseudotumor cerebri. *Acta Neurol Scand* 1986;73:264-268.
4. Kharkar S, Hernandez R, Batra S, et al. Cognitive impairment in patients with Pseudotumor Cerebri Syndrome. *Behav Neurol* 2011;24:143-148.
5. Kaplan CP, Miner ME, McGregor JM. Pseudotumour cerebri: risk for cognitive impairment? *Brain Inj* 1997;11:293-303.
6. Friedman DI, Jacobson DM. Diagnostic criteria for idiopathic intracranial hypertension. *Neurology* 2002;59:1492-1495.
7. The International Classification of Headache Disorders, 3rd edition (beta version). *Cephalalgia* 2013;33:629-808.
8. Yri HM, Wegener M, Sander B, et al. Idiopathic intracranial hypertension is not benign: a long-term outcome study. *J Neurol* 2012;259:886-894.
9. Levaux MN, Potvin S, Sepehry AA, et al. Computerized assessment of cognition in schizophrenia: promises and pitfalls of CANTAB. *Eur Psychiatry* 2007;22:104-115.

- 1  
2  
3  
4 10. O'Carroll RE, Prentice N, Murray C, et al. Further evidence that reading ability is not preserved  
5  
6 in Alzheimer's disease. *Br J Psychiatry* 1995;167:659-662.  
7  
8
- 9  
10 11. Iddon JL, Pickard JD, Cross JJ, et al. Specific patterns of cognitive impairment in patients with  
11  
12 idiopathic normal pressure hydrocephalus and Alzheimer's disease: a pilot study. *J Neurol*  
13  
14 *Neurosurg Psychiatry* 1999;67:723-732.  
15  
16
- 17 12. Andersen R, Fagerlund B, Rasmussen H, et al. Cognitive effects of six months of treatment  
18  
19 with quetiapine in antipsychotic-naive first-episode schizophrenia. *Psychiatry Res*  
20  
21 2011;187:49-54.  
22  
23
- 24 13. Heinrichs RW, Zakzanis KK. Neurocognitive deficit in schizophrenia: a quantitative review of  
25  
26 the evidence. *Neuropsychology* 1998;12:426-445.  
27  
28
- 29 14. Foong J, Rozewicz L, Quaghebeur G, et al. Executive function in multiple sclerosis. The role of  
30  
31 frontal lobe pathology. *Brain* 1997;120 ( Pt 1):15-26.  
32  
33
- 34 15. Ruet A, Deloire MS, Charre-Morin J, et al. A new computerised cognitive test for the detection  
35  
36 of information processing speed impairment in multiple sclerosis. *Mult Scler* Published Online  
37  
38 First: 4 Mar 2013. doi: 10.1177/1352458513480251.  
39  
40  
41
- 42 16. Lapshin H, Lanctot KL, O'Connor P, et al. Assessing the validity of a computer-generated  
43  
44 cognitive screening instrument for patients with multiple sclerosis. *Mult Scler* Published  
45  
46 Online First: 7 May 2013. doi: 10.1177/1352458513488841  
47  
48
- 49 17. Green MF, Kern RS, Braff DL, et al. Neurocognitive deficits and functional outcome in  
50  
51 schizophrenia: are we measuring the "right stuff"? *Schizophr Bull* 2000;26:119-136.  
52  
53  
54  
55  
56  
57  
58  
59  
60

18. Jaeger J, Tatsuoka C, Berns S, et al. Associating functional recovery with neurocognitive profiles identified using partially ordered classification models. *Schizophr Res* 2006;85:40-48.
19. Tso MO, Hayreh SS. Optic disc edema in raised intracranial pressure. III. A pathologic study of experimental papilledema. *Arch Ophthalmol* 1977;95:1448-1457.
20. Beeri MS, Moshier E, Schmeidler J, et al. Serum concentration of an inflammatory glycotoxin, methylglyoxal, is associated with increased cognitive decline in elderly individuals. *Mech Ageing Dev* 2011;132:583-587.
21. Moser FG, Hilal SK, Abrams G, et al. MR imaging of pseudotumor cerebri. *AJR Am J Roentgenol* 1988;150:903-909.
22. Gideon P, Sorensen PS, Thomsen C, et al. Increased brain water self-diffusion in patients with idiopathic intracranial hypertension. *AJNR Am J Neuroradiol* 1995;16:381-387.
23. Wall M, Dollar JD, Sadun AA, et al. Idiopathic intracranial hypertension. Lack of histologic evidence for cerebral edema. *Arch Neurol* 1995;52:141-145.
24. Joynt RJ, Sahs AL. Brain swelling of unknown cause. *Neurology* 1956;6:801-803.
25. Hoffmann J, Huppertz HJ, Schmidt C, et al. Morphometric and volumetric MRI changes in idiopathic intracranial hypertension. *Cephalalgia* 2013.
26. Mulder EJ, Linssen WH, Passchier J, et al. Interictal and postictal cognitive changes in migraine. *Cephalalgia* 1999;19:557-565.
27. Schmitz N, Arkink EB, Mulder M, et al. Frontal lobe structure and executive function in migraine patients. *Neurosci Lett* 2008;440:92-96.

- 1  
2  
3  
4 28. Le PF, Zappala G, Giuffrida S, et al. Memory disturbances in migraine with and without aura: a  
5 strategy problem? *Cephalalgia* 2000;20:475-478.  
6  
7  
8  
9 29. Rist PM, Kurth T. Migraine and cognitive decline: a topical review. *Headache* 2013;53:589-  
10 598.  
11  
12  
13 30. Block C, Cianfrini L. Neuropsychological and neuroanatomical sequelae of chronic non-  
14 malignant pain and opioid analgesia. *NeuroRehabilitation* 2013;33:343-366.  
15  
16  
17 31. Moriarty O, McGuire BE, Finn DP. The effect of pain on cognitive function: a review of  
18 clinical and preclinical research. *Prog Neurobiol* 2011;93:385-404.  
19  
20  
21 32. Brown SC, Glass JM, Park DC. The relationship of pain and depression to cognitive function in  
22 rheumatoid arthritis patients. *Pain* 2002;96:279-284.  
23  
24  
25  
26  
27  
28  
29  
30  
31

## FIGURE TITLES AND LEGENDS

### Figur 1.

**Title:** Cognitive deficits in patients with IIH at time of diagnosis

**Legends:** Cognitive function in patients with IIH at time of diagnosis (n=31) shown in standard deviations from healthy controls (z-score). Error bars represent S.E.M. Colors indicate which domain the tests represent. \*p<0.05 \*\*p<0.005 \*\*\*p<0.0005.

### Figure 2.

**Title:** Cognitive deficits in patients with IIH at time of diagnosis and at follow-up

**Legends:** Changes in test performance from time of diagnosis to follow-up (n=29) in patients with IIH shown in standard deviations from healthy controls (z-score). Error bars represent S.E.M. \*p<0.05 \*\*p<0.005 \*\*\*p<0.001.

1  
2  
3  
4  
5  
6  
7  
8  
9  
10  
11  
12  
13  
14  
15  
16  
17  
18  
19  
20  
21  
22  
23  
24  
25  
26  
27  
28  
29  
30  
31  
32  
33  
34  
35  
36  
37  
38  
39  
40  
41  
42  
43  
44  
45  
46  
47  
48  
49  
50  
51  
52  
53  
54  
55  
56  
57  
58  
59  
60

For peer review only

1  
2  
3  
4 Idiopathic intracranial hypertension is associated with cognitive  
5  
6  
7 dysfunction — a prospective case-control study  
8  
9

10 Hanne Maria Yri MD<sup>1</sup>, Birgitte Fagerlund MA, PhD<sup>2</sup>, Hysse Birgitte Forchhammer MA, PhD<sup>3</sup>,  
11 Rigmor Højland Jensen MD, Dr Med Sci<sup>1</sup>  
12  
13

- 14  
15 1. Danish Headache Center, Department of Neurology, Glostrup Hospital, University of  
16 Copenhagen, Denmark.  
17  
18 2. Center for Neuropsychiatric Schizophrenia Research, Psychiatric Center Glostrup, University  
19 of Copenhagen, Denmark  
20  
21 3. Department of Neurology, Glostrup Hospital, University of Copenhagen, Denmark  
22  
23  
24

25  
26 **CORRESPONDING AUTHOR**

27 Rigmor Højland Jensen, Danish Headache Center, Department of Neurology, Glostrup Hospital,  
28

29 Ndr. Ringvej 69, 2600 Glostrup, Denmark. E-mail: rigmor.jensen@regionh.dk.  
30  
31

32 Telephone: +45 38 63 30 59. Fax: +45 38 63 30 71  
33  
34  
35

36  
37 **KEY WORDS**

38 Idiopathic intracranial hypertension, pseudotumor cerebri, cognition disorders, case-control studies.  
39  
40  
41  
42

43 **WORD COUNT:** 3172

44  
45 **NUMBER OF REFERENCES:** 32  
46  
47  
48  
49  
50  
51  
52  
53  
54  
55  
56  
57  
58  
59  
60



**ABSTRACT**

**Objective:** To explore the extent and nature of cognitive deficits in patients with idiopathic intracranial hypertension at time of diagnosis and after three months of treatment.

**Design:** Prospective case-control study.

**Setting:** Neurological department, ophthalmological department and a tertiary headache referral clinic at a Danish university hospital.

**Participants:** Thirty-one patients with definite idiopathic intracranial hypertension referred from June 2011– February 2013 and included within one week of diagnostic intracranial pressure measurement. Twenty-nine patients completed re-examined at the 3-month follow-up. At time of testing none of the patients took medication potentially affecting cognitive function. Controls were 31 healthy age- and sex-matched volunteers from the local community.

**Outcome measures:** Executive function, working memory, visuospatial memory, processing speed, attention, and reaction time assessed by a comprehensive neuropsychological test battery consisting of validated computerized (Cambridge Neuropsychological Test Automated Battery (CANTAB)) and paper-and-pencil tests.

**Results:** Patients with idiopathic intracranial hypertension performed significantly worse than controls in four of six cognitive domains ( $p \leq 0.02$ ). Deficits were most pronounced in reaction time (1.45 SD below controls 95% CI 2.10 to 0.85) and processing speed (1.45 SD below controls 95% CI 2.08 to 0.81). Despite marked improvement in intracranial pressure and headache, re-examination showed persistent cognitive dysfunction three months after diagnosis and start of treatment.

**Conclusions:** We demonstrate for the first time in a well-defined cohort of patients that idiopathic intracranial hypertension may be associated with cognitive dysfunction. This could explain the functional disability of patients with idiopathic intracranial hypertension. A focused

1  
2  
3  
4 multidisciplinary approach including neuropsychological rehabilitation therefore might be relevant in  
5  
6 the treatment of patients with idiopathic intracranial hypertension.  
7  
8  
9

## 10 11 **ARTICLE SUMMARY**

### 12 13 **Strengths and limitations of this study**

- 14  
15 • The first study to assess a broad range of cognitive functions in more than 10 patients
- 16  
17 • Prospective controlled design and a well defined study population
- 18  
19 • Controls were matched for age, sex and pre-morbid intelligence and in comparisons of  
20  
21 cognitive measures we adjusted for education and headache at time of testing.  
22  
23
- 24  
25 • The study was non-blinded and controls were not matched for Body Mass Index (BMI)
- 26  
27 • Cognitive assessment by an automated computerized test battery reduced the influence of the  
28  
29 non-blinded observer  
30  
31  
32  
33  
34  
35  
36  
37  
38  
39  
40  
41  
42  
43  
44  
45  
46  
47  
48  
49  
50  
51  
52  
53  
54  
55  
56  
57  
58  
59  
60

## INTRODUCTION

Due to predilection for young individuals of working age [idiopathic intracranial hypertension \(IIH\)](#) is a condition with substantial socioeconomic consequences. In USA alone the estimated annual costs exceed \$444 million (> \$17,000 /patient).<sup>1</sup> In addition to direct medical cost the major expenses was loss of wages caused by patients having to give up work or change profession due to IIH. Loss of income due to IIH is reported by 48% of patients,<sup>1</sup> but the exact cause of this substantial disability is yet unknown.

Despite obvious threat to visual function compliance with long-term treatment is often poor. In our clinics we experience a substantial lack of initiative and self-awareness in patients with IIH which has raised the suspicion of prefrontal dysfunction. However, while numerous studies describe the visual and headache-related complications of IIH, very little is known about the cognitive implications of the disease. Except for a single memory test conducted in 85 patients<sup>2</sup> the cognitive function in IIH has only been tested in a few very small study populations.<sup>3-5</sup> In all studies, apart from the case-report by Kaplan et al.,<sup>5</sup> testing revealed significant cognitive deficits in patients with IIH. Especially within verbal tests and memory deficits have been demonstrated.

The aim of this case-control study is to explore in details the extent and nature of cognitive deficits in patients with IIH at time of diagnosis and after three months of treatment.

## METHODS

### Subjects

We recruited 31 consecutive patients with IIH referred to the Department of Neuro-Ophthalmology, the Department of Neurology or the Danish Headache Center, Glostrup Hospital from June 2011–February 2013. Sample size was determined by the number of cases referred in the inclusion period. Twenty-eight of the patients were newly diagnosed with IIH, three patients had well-defined relapse

1  
2  
3  
4 of IHH after a minimum of 10 months (range 10-26 months) of medication-free remission (resolved  
5 headache and papilledema). All patients had definite IHH according to the diagnostic criteria.<sup>6,7</sup> We  
6 included only patients that could be tested within seven days of confirmed diagnosis. Exclusion  
7 criteria were: other disorders or medication that could potentially affect cognition, decreased visual  
8 acuity, or language skills (Danish) deemed insufficient for participation in the cognitive assessment.  
9  
10 Thirty-one healthy and headache free (defined as less than 4 headache days/month) controls,  
11 matched for age and sex, were recruited by advertising at Glostrup Hospital and on the website  
12 forsogspersonen.dk. Healthy controls were tested only once and did not have a lumbar puncture  
13 performed. Otherwise the cognitive examination program for patients and controls was identical.  
14  
15  
16  
17  
18  
19  
20  
21  
22  
23  
24  
25

### 26 **Standard protocol approvals, registration and patients consents**

27  
28 All participants gave written, informed consent to participate in the study. The study was conducted  
29 in accordance with the declaration of Helsinki and approved by the Regional Ethics Committee.  
30  
31  
32  
33  
34

### 35 **General examination**

36  
37 At time of diagnosis patients underwent a complete neurological examination including MR/CT-  
38 imaging with venous sequences. All but one patient underwent thorough standardized neuro-  
39 ophthalmological examination.<sup>8</sup> The remaining patient did not participate in the neuro-  
40 ophthalmological evaluation in spite of numerous invitations. A general ophthalmological  
41 examination was, however, performed at the local referring ophthalmological department.  
42  
43  
44  
45  
46  
47  
48  
49  
50  
51  
52  
53  
54  
55  
56  
57  
58  
59  
60

## Treatment

After diagnostic lumbar puncture and after cognitive testing was completed, treatment with acetazolamide was initiated. From baseline to 3-month follow-up doses were individually adjusted at doses of 750-2225 mg/day. Due to intolerable side effects acetazolamide was replaced by topiramate, 125 mg/day in one patient. Treatment with acetazolamide and topiramate was paused respectively three and seven days before the 3-month follow-up examinations.

Infrequent (<14 days/month) use of simple analgesics (paracetamol and/or acetylsalicylic acid) was allowed. Treatment did not include use of opiate analgesics or tranquilizers.

Weight-loss was strongly recommended and patients were offered dietician consultations.

## ICP

ICP was measured at baseline and at the 3-month follow-up. In one patient ICP was measured by direct intracranial pressure monitoring. In the remaining patients (n=30) ICP was measured by standardized lumbar puncture manometry. Patients were placed in lateral decubital position, had their legs straightened and were given a minimum of 10 min to relax before a stabilized pressure was recorded.

## Cognitive testing

We assessed cognitive function by a neuropsychological test battery of validated computerized (Cambridge Neuropsychological Test Automated Battery (CANTAB))<sup>9</sup> and paper-and-pencil tests.

Paper-and-pencil tests: (a) **Rey – Osterreith's Complex Figure Test**, testing visuospatial memory; (b) **Trail Making Test A and B**, primarily testing psychomotor speed; (c) **Symbol Digit Modalities Test**, testing psychomotor speed; (d) **Verbal Fluency Test**, testing verbal semantic and phonological

1  
2  
3  
4 fluency. The letters “S” and “A” and the categories “animals” and “items in a supermarket” were  
5  
6 used.

7  
8 CANTAB computerized tests: (e) **Motor screening test** to familiarize subjects with the touch screen;  
9  
10 (f) **Spatial Span**, assessing visuospatial working memory span; (g) **Spatial Working Memory**,  
11  
12 testing the ability to retain and manipulate spatial information in working memory; (h) **Stockings of**  
13  
14 **Cambridge**, assessing spatial planning ability; (i) **Intra-Extra Dimensional Set Shift**, testing  
15  
16 cognitive flexibility, requiring the formation and shifting of attentional set; (j) **Reaction Time**,  
17  
18 assessing motor and reaction time latencies; (k) **Rapid Visual Information Processing**, testing  
19  
20 sustained attention with a working memory load.  
21  
22

23  
24 The **Danish Adult Reading Test** (Danish version of the National Adult Reading Test) was applied  
25  
26 as an estimate of premorbid intelligence.<sup>10</sup>  
27

28  
29 The test battery was administered in a fixed order by the same physician (HY), instructed and trained  
30  
31 by experienced neuro-psychologists (HF, BF). To ensure uniform test instructions we used a written  
32  
33 instruction-manual during all sessions. Headache intensity at time of testing was recorded by a 10-  
34  
35 point Visual Analogue Scale (VAS). Patients were re-tested at the 3-month follow-up.  
36  
37

### 38 39 **Statistical analysis**

40  
41 Statistical analyses were conducted using SAS 9.3. Significance levels were set at 0.05. Non-normal  
42  
43 distributed data were logarithmically transformed to reduce skewness. Categorical data were  
44  
45 investigated by Chi-square test, Fishers’ exact test and McNemar test.  
46  
47

48  
49 Test-scores of patients and healthy controls were compared using a linear mixed model adjusting for  
50  
51 education and headache at time of testing. Changes in patient test-scores from baseline to follow-up  
52  
53 were analyzed in a linear mixed model for paired data adjusting for headache at time of testing. Test  
54  
55 performance in patients with normalized ICP at follow-up and patient with continuous elevated ICP  
56  
57  
58  
59  
60

1  
2  
3  
4 was compared in a mixed model using  $ICP \leq 25$  cmH<sub>2</sub>O and  $ICP < 25$  cmH<sub>2</sub>O as a binary categorical  
5  
6 variable. In addition the effect of ICP change (as a continuous variable) on difference in test  
7  
8 performance from baseline to follow-up was analyzed.  
9

10 The effects of depression and chronic pain on cognitive performance were explored within the  
11  
12 patient group in a model comparing subjects with or without these traits, adjusting for education and  
13  
14 headache at time of testing. The effect of BMI was explored in a similar model with BMI as a  
15  
16 continuous variable.  
17

18 To avoid effects of multiple comparisons in the analyses of cognitive function, the analyses were  
19  
20 performed in mixed linear models including all 19 subtest scores into the same model.  
21  
22

23 For comparability of test-scores and evaluation of effect sizes, test-scores were standardized into z-  
24  
25 scores. Z-scores were based on performance of the healthy controls which by definition had a mean  
26  
27 scale score of zero and SD set to one. All scales were computed so that a higher z-score indicate  
28  
29 better performance.  
30  
31

32 We used standardized test-scores to create composite domain scores, calculated by grouping selected  
33  
34 tests, based on which cognitive domain they theoretically represented. Z-scores for cognitive  
35  
36 domains were averaged and re-standardized based on the composite domain average and standard  
37  
38 deviation of healthy controls.  
39  
40

41 Although they spoke Danish fluently, Trail Making Test scores and Verbal Fluency scores from non-  
42  
43 native Danish speakers (n=2) were omitted from statistical analysis as these test are potentially  
44  
45 influenced by language-fluency and familiarity with the Latin alphabet. In domain construction the  
46  
47 average of the remaining tests was used to determine the domain score.  
48  
49  
50  
51  
52  
53  
54  
55  
56  
57  
58  
59  
60

## RESULTS

### Demographics and clinical characteristics at baseline

Patients and healthy controls did not differ in demographics, household income, educational level or premorbid intelligence level (Table 1). However, patient had significantly higher BMI and slightly less education counted in years than healthy controls.

Headache at the time of testing was reported by the majority of patients, but by none of the controls (Table 1). General headache disability in patients was heterogeneous. Ten patients fulfilled the criteria of chronic headache ( $\geq 15$  days/month for 3 months)<sup>7</sup>, four patients had frequent headache (mean 7.7 days/month)<sup>7</sup>, seven had infrequent headache ( $< 1$  day /month)<sup>7</sup>, 14 had only had headache in the weeks up until diagnosis and four patient had no headache at all. Healthy controls reported infrequent headaches with a mean frequency at 0.5 days/month.

Visual fields (Automated perimetry, Humphrey 30-2) were bilaterally normal in 14 patients and normal in at least one eye in another eight patients. Seven patients had mild bilateral peripheral defects. One patient had bilateral concentric defects with remaining 15-20 central degrees of vision. In the cognitive tests this patient performed equally to the average patient. No photophobia or visual disturbances were reported during testing.

Depression (explicitly specified in the standardized interview) was reported by 8 (26%). Other comorbidities included tension-type headache (n=12), migraine (n=7), diabetes (n=2), hypertension (n=2), inflammatory bowel disease (n=2), mild personality disorder (n=1), asthma (n=1), fibromyalgia (n=1), small pineal gland cyst (n=1)(asymptomatic, discovered on routine MR at time of IHH-diagnosis), sequela after monocular central serous chorioretinopathy (n=1), intermittent claudication (n=1), lumbar disc herniation (n=1).

Twenty-two patients were on either short term (n=18) or long-term sick-leave (n=4), five were unemployed and three had retired from work for reasons other than IHH.



**Table 1. Demographics and clinical characteristics for IHH patients at baseline and at follow-up and healthy controls**

|                                                                        | IHH Baseline | IHH Follow-up | Controls    | Statistics       |                  |
|------------------------------------------------------------------------|--------------|---------------|-------------|------------------|------------------|
|                                                                        | n=31         | n=29          | n=31        | p <sup>d</sup>   | p <sup>e</sup>   |
| <b>Demographics</b>                                                    |              |               |             |                  |                  |
| Age (SD), <i>years</i>                                                 | 31.0 (11.2)  |               | 30.7 (11.2) | 0.91             |                  |
| Gender, <i>f/m</i>                                                     | 31/0         |               | 31/0        |                  |                  |
| Danish Adult Reading Test (SD), <i>words</i>                           | 22.9 (6.8)   |               | 24.8 (5.3)  | 0.15             |                  |
| Education (SD), <i>years</i>                                           | 11.2 (2.2)   |               | 12.8 (2.1)  | <b>0.001</b>     |                  |
| <u>Educational level</u>                                               |              |               |             | 0.38             |                  |
| Long cycle higher ( $\geq 5$ years), <i>n</i>                          | 0            |               | 3           |                  |                  |
| Medium cycle higher (3–5 years), <i>n</i>                              | 4            |               | 7           |                  |                  |
| Short cycle higher (<3 years), <i>n</i>                                | 4            |               | 4           |                  |                  |
| Vocational upper- secondary, <i>n</i>                                  | 5            |               | 3           |                  |                  |
| Student, <i>n</i>                                                      | 10           |               | 10          |                  |                  |
| No education, <i>n</i>                                                 | 8            |               | 4           |                  |                  |
| <u>Household income</u>                                                |              |               |             | 0.81             |                  |
| High (>DKK 400,000/year), <i>n</i>                                     | 10           |               | 8           |                  |                  |
| Middle (DKK 200-400,000/year), <i>n</i>                                | 12           |               | 12          |                  |                  |
| Low (<DKK 200,000/year), <i>n</i>                                      | 9            |               | 11          |                  |                  |
| <b>Clinical Characteristics</b>                                        |              |               |             |                  |                  |
| BMI (SD), <i>kg/m<sup>2</sup></i>                                      | 35.7 (6.2)   | 34.0 (6.0)    | 23.6 (4.0)  | <b>&lt;0.001</b> | <b>0.009</b>     |
| Headache at time of testing, <i>n (%)</i>                              | 22 (71)      | 14 (48)       | 0           |                  |                  |
| Mean headache intensity (SD), <i>VAS</i>                               | 2.64 (2.3)   | 1.84 (2.4)    |             |                  | <b>0.01</b>      |
| ICP $\leftrightarrow$ cognitive testing <sup>a</sup> (SD), <i>days</i> | 3 (2.4)      | 1 (1.6)       |             |                  |                  |
| Mean ICP <sup>b</sup> (SD), <i>cmH<sub>2</sub>O</i>                    | 41.0 (12.6)  | 25.9 (5.5)    |             |                  | <b>&lt;0.001</b> |
| Memory difficulties <sup>c</sup> , <i>n (%)</i>                        | 17 (55)      | 18 (62)       |             |                  | 0.42             |

|                                                        |            |         |      |
|--------------------------------------------------------|------------|---------|------|
| Concentration difficulties <sup>c</sup> , <i>n</i> (%) | 20 (65)    | 15 (52) | 0.18 |
| Duration of IHH symptoms (SD), <i>months</i>           | 4.34 (5.4) |         |      |

Chi-square test was used for household income, Fishers' exact test for educational level and McNemars' test for paired categorical variables. 2-tailed T-test was used for numerical variables. Significant p-values are printed in bold. <sup>a</sup>Time-span between ICP measurement and cognitive testing. <sup>b</sup>ICP measured with intracranial pressure monitor (n=1) not included. <sup>c</sup>Subjective difficulties reported by the patients. <sup>p<sup>d</sup></sup>: difference between patients at baseline and healthy controls. <sup>p<sup>e</sup></sup>: difference between patients at baseline and follow-up.

### Cognitive function in patients at baseline

IHH-patients performed significantly worse than controls in four of six cognitive domains and in 13 of 19 subtests (Table 2). The most pronounced deficits were found in the domains of processing speed and reaction time (Figure 1). Even though deficits in executive functions only reached trend levels of significance patients scored significantly worse in the subtest measuring cognitive flexibility (ID/ED errors). Likewise, patients performed significantly worse in the subtest measuring spatial working memory strategy although no overall deficits in working memory was found.

Sub-analyses within the patients group showed no difference between patients with or without depression or with or without chronic headache. Performance in cognitive tests within the patient group did was not related to BMI (ranging from 24.2 – 48.8 kg/m<sup>2</sup>).

**Table 2. Cognitive test scores and composite domain scores at baseline compared to healthy controls**

| Test Variables                              | Raw-scores           |                          | Z-scores and statistics |             |                   |
|---------------------------------------------|----------------------|--------------------------|-------------------------|-------------|-------------------|
|                                             | IIH Baseline<br>n=31 | Healthy Controls<br>n=31 | Z                       | 95% CL      | p                 |
| <b><u>Executive function</u></b>            |                      |                          | -0.61                   | -1.25;0.02  | 0.059             |
| <b>Intra-Extra Dimensional</b>              |                      |                          |                         |             |                   |
| <b>Set Shift</b>                            |                      |                          |                         |             |                   |
| ID/ED Errors <sup>log</sup>                 | 8.1 (0-32)           | 4.0 (0-25)               | -0.94                   | -1.54;-0.35 | <b>0.002</b>      |
| Total errors adjusted <sup>log</sup> , s    | 20.9 (7-177)         | 12.2 (7-55)              | -0.91                   | -1.50;-0.32 | <b>0.003</b>      |
| <b>Stockings of Cambridge</b>               |                      |                          |                         |             |                   |
| Solved in minimum moves                     | 9.61 (2.0)           | 10.19 (1.7)              | -0.28                   | -0.87;0.31  | 0.31              |
| Initial thinking time <sup>log</sup> , s    | 6.5 (2.0-18.3)       | 8.2 (3.1-40.7)           | 0.49                    | -0.11;1.08  | 0.11              |
| Subsequent thinking time <sup>log</sup> , s | 0.013 (0-3.7)        | 0.011 (0-3.0)            | 0.09                    | -0.51;0.68  | 0.77              |
| <b>Trail Making Test<sup>a</sup></b>        |                      |                          |                         |             |                   |
| Trail Making B-A <sup>log</sup> , s         | 39.2 (14.7-101.1)    | 30.62 (16.3-98.4)        | -0.56                   | -1.10;0.09  | 0.07              |
| <b><u>Working memory</u></b>                |                      |                          | -0.56                   | -1.19;0.08  | 0.08              |
| <b>Spatial Working Memory</b>               |                      |                          |                         |             |                   |
| Strategy score <sup>log</sup>               | 29.9 (20-42)         | 24.8 (19-40)             | -0.75                   | -1.35;-0.16 | <b>0.01</b>       |
| Total errors <sup>log</sup>                 | 10.2 (0-79)          | 4.7 (0-70)               | -0.48                   | -1.07;0.12  | 0.11              |
| <b>Spatial Span:</b>                        |                      |                          |                         |             |                   |
| Span length                                 | 6.4 (1.3)            | 7.0 (1.4)                | -0.31                   | -0.90;0.28  | 0.31              |
| <b><u>Processing speed</u></b>              |                      |                          | -1.45                   | -2.08;-0.81 | <b>&lt;0.0001</b> |
| <b>Verbal Fluency<sup>a</sup></b>           |                      |                          |                         |             |                   |
| Letters                                     | 19.4 (7.0)           | 30.3 (8.3)               | -1.25                   | -1.84;-0.65 | <b>&lt;0.0001</b> |
| Categories                                  | 39.8 (9.9)           | 55.5 (12.3)              | -1.21                   | -1.81;-0.61 | <b>&lt;0.0001</b> |

**Trail Making Test<sup>a</sup>**

|                                          |                  |                  |       |             |             |
|------------------------------------------|------------------|------------------|-------|-------------|-------------|
| Trail Making A <sup>log</sup> , <i>s</i> | 31.5 (18.0-68.1) | 25.2 (12.8-51.4) | -0.63 | -1.22;-0.02 | <b>0.04</b> |
|------------------------------------------|------------------|------------------|-------|-------------|-------------|

|                                          |                   |                   |       |             |             |
|------------------------------------------|-------------------|-------------------|-------|-------------|-------------|
| Trail Making B <sup>log</sup> , <i>s</i> | 73.5 (40.9-169.2) | 52.2 (31.2-131.1) | -0.66 | -1.26;-0.07 | <b>0.02</b> |
|------------------------------------------|-------------------|-------------------|-------|-------------|-------------|

**Symbol Digit Modalities**

|                 |             |            |       |             |               |
|-----------------|-------------|------------|-------|-------------|---------------|
| Correct symbols | 47.8 (10.2) | 58.7 (9.0) | -1.09 | -1.68;-0.49 | <b>0.0003</b> |
|-----------------|-------------|------------|-------|-------------|---------------|

**Visuospatial memory**

|  |  |  |       |             |             |
|--|--|--|-------|-------------|-------------|
|  |  |  | -0.74 | -1.32;-0.05 | <b>0.02</b> |
|--|--|--|-------|-------------|-------------|

**Rey-Osterreith Figure**

|                                |            |            |       |             |             |
|--------------------------------|------------|------------|-------|-------------|-------------|
| Immediate recall, <i>score</i> | 24.5 (5.4) | 28.0 (4.3) | -0.67 | -1.26;-0.08 | <b>0.03</b> |
|--------------------------------|------------|------------|-------|-------------|-------------|

|                              |            |            |       |             |              |
|------------------------------|------------|------------|-------|-------------|--------------|
| Delayed recall, <i>score</i> | 23.8 (5.0) | 28.0 (4.4) | -0.83 | -1.42;-0.24 | <b>0.006</b> |
|------------------------------|------------|------------|-------|-------------|--------------|

**Attention****Rapid Visual Processing**

|                          |           |            |       |             |             |
|--------------------------|-----------|------------|-------|-------------|-------------|
| A' sensitivity to target | 0.9 (0.1) | 0.93 (0.1) | -0.70 | -1.30;-0.11 | <b>0.01</b> |
|--------------------------|-----------|------------|-------|-------------|-------------|

**Reaction time**

|  |  |  |       |             |                   |
|--|--|--|-------|-------------|-------------------|
|  |  |  | -1.48 | -2.10;-0.85 | <b>&lt;0.0001</b> |
|--|--|--|-------|-------------|-------------------|

**Reaction Time:**

|                                     |                     |                     |       |             |                   |
|-------------------------------------|---------------------|---------------------|-------|-------------|-------------------|
| Reaction <sup>log</sup> , <i>ms</i> | 409.4 (264.9-988.6) | 330.0 (247.6-464.1) | -1.81 | -2.40;-1.22 | <b>&lt;0.0001</b> |
|-------------------------------------|---------------------|---------------------|-------|-------------|-------------------|

|                     |              |              |       |             |              |
|---------------------|--------------|--------------|-------|-------------|--------------|
| Movement, <i>ms</i> | 417.8 (86.3) | 338.3 (80.1) | -0.84 | -1.43;-0.25 | <b>0.006</b> |
|---------------------|--------------|--------------|-------|-------------|--------------|

---

Normally distributed raw-score variables are shown as mean (SD). Logarithmically transformed variables<sup>log</sup> are shown as arithmetic mean (range). Z-scores and test statistics are given in estimates from a linear mixed model adjusting for education and headache at time of testing and multiple testing. Significant p-values are printed in bold. <sup>a</sup>n=29, as Trail Making Test scores and Verbal Fluency scores from non-native Danish speakers (n=2) were omitted from analysis.

### Clinical characteristics at follow-up

In spite of several invitations to attend a follow-up examination two patients dropped out from baseline to follow-up. Clinical characteristics and baseline test-scores in these 2 patients did not differ from the rest of the patient group.

Twenty-nine patients were reexamined at the 3-month follow-up. One patient refused to have lumbar puncture performed at follow-up. A normalized ICP was found in 14 of the remaining 28 patients.

Less than half of the patients had headache during cognitive re-testing (Table 1). Visual fields were either stable or had improved from baseline.

Fourteen of 31 patients had resumed work/school, 11 patients were now on long-term sick-leave, one patient had reduced and altered work schedule due to IIH and two patients were unemployed.

### Cognitive function at follow-up

After 3-months of treatment statistical significant improvement was detected in two domains (Table 3). Attention scores (RVP A') had practically normalized while performance in visuospatial memory tests improved to a level above performance in healthy controls.

No overall change was detected in the domains of executive function, working memory, processing speed and reaction time (Figure 2). Patients in which ICP had normalized ( $<25$  cmH<sub>2</sub>O) did not perform better than patients in which elevated ICP persisted (ICP $>25$  cmH<sub>2</sub>O) and performance was not significantly associated with intensity or presence/absence of headache during the test. [No correlation was found between change in cognitive performance and difference in ICP from baseline.](#)

**Table 3. Cognitive test scores and composite domain scores at follow-up compared to baseline**

| Test Variables                              | Raw-scores        |                 | Z-scores and statistics |             |              |
|---------------------------------------------|-------------------|-----------------|-------------------------|-------------|--------------|
|                                             | IIH Baseline      | IIH Follow-up   | Z <sup>b</sup>          | 95% CL      | p            |
|                                             | n=31              | n=29            |                         |             |              |
| <b><u>Executive function</u></b>            |                   |                 | -0.18                   | -0.77;0.42  | 0.16         |
| <b>Intra-Extra Dimensional</b>              |                   |                 |                         |             |              |
| <b>Set Shift</b>                            |                   |                 |                         |             |              |
| ID/ED Errors <sup>log</sup>                 | 8.1 (0–32)        | 5.8 (1–32)      | -0.82                   | -1.40;-0.25 | 0.77         |
| Total errors adjusted <sup>log</sup> , s    | 20.9 (7–177)      | 14.4 (7–68)     | -0.56                   | -1.14;0.01  | 0.26         |
| <b>Stockings of Cambridge</b>               |                   |                 |                         |             |              |
| Solved in minimum moves                     | 9.61 (2.0)        | 19.9 (2.0)      | -0.08                   | -0.66;0.49  | 0.55         |
| Initial thinking time <sup>log</sup> , s    | 6.5 (2.0–18.3)    | 6.7 (2.5–18.4)  | 0.45                    | -0.14;1.02  | 0.98         |
| Subsequent thinking time <sup>log</sup> , s | 0.013 (0–3.7)     | 0.013 (0–3.7)   | 0.11                    | -0.47;0.68  | 0.85         |
| <b>Trail Making Test<sup>a</sup></b>        |                   |                 |                         |             |              |
| Trail Making B-A <sup>log</sup> , s         | 39.2 (14.7–101.1) | 33.1 (1.3–79.5) | 0.46                    | -0.12;1.05  | <b>0.002</b> |
| <b><u>Working memory</u></b>                |                   |                 | -0.33                   | -0.84;0.18  | 0.44         |
| <b>Spatial Working Memory</b>               |                   |                 |                         |             |              |
| Strategy score <sup>log</sup>               | 29.9 (20-42)      | 27.9 (19–42)    | -0.24                   | -0.81;0.34  | 0.10         |
| Total errors <sup>log</sup>                 | 10.2 (0–79)       | 10.1 (0–61)     | -0.24                   | -0.81;0.34  | 0.50         |
| <b>Spatial Span:</b>                        |                   |                 |                         |             |              |
| Span length                                 | 6.4 (1.3)         | 6.4 (1.3)       | -0.27                   | -0.85;0.31  | 0.96         |
| <b><u>Processing speed</u></b>              |                   |                 | -1.23                   | -1.83;-0.64 | 0.49         |
| <b>Verbal Fluency<sup>a</sup></b>           |                   |                 |                         |             |              |
| Letters                                     | 19.4 (7.0)        | 18.6 (6.6)      | -1.27                   | -1.86;-0.69 | 0.88         |
| Categories                                  | 39.8 (9.9)        | 42.5 (10.8)     | -0.93                   | -1.51;-0.34 | 0.41         |

| <b>Trail Making Test<sup>a</sup></b> |                     |                     |       |             |               |
|--------------------------------------|---------------------|---------------------|-------|-------------|---------------|
| Trail Making A <sup>log</sup> , s    | 31.5 (18.0–68.1)    | 32.9 (9.8)          | -0.56 | -1.15;0.02  | 0.95          |
| Trail Making B <sup>log</sup> , s    | 73.5 (40.9–169.2)   | 66.1 (38.7–125.4)   | -0.18 | -0.79;0.40  | 0.16          |
| <b>Symbol Digit Modalities</b>       |                     |                     |       |             |               |
| Correct symbols                      | 47.8 (10.2)         | 49.1 (12.3)         | -0.91 | -1.49;-0.33 | 0.50          |
| <b><u>Visuospatial memory</u></b>    |                     |                     | 0.39  | -0.17;1.02  | <b>0.0005</b> |
| <b>Rey-Osterreith Figure</b>         |                     |                     |       |             |               |
| Immediate recall, score              | 24.5 (5.4)          | 28.9 (4.1)          | 0.36  | -0.22;0.93  | <b>0.002</b>  |
| Delayed recall, score                | 23.8 (5.0)          | 28.8 (3.8)          | 0.31  | -0.26;0.89  | <b>0.0002</b> |
| <b><u>Attention</u></b>              |                     |                     |       |             |               |
| <b>Rapid Visual Processing</b>       |                     |                     |       |             |               |
| A' sensitivity to target             | 0.9 (0.1)           | 0.92 (0.04)         | -0.14 | -0.71;0.43  | <b>0.03</b>   |
| <b><u>Reaction time</u></b>          |                     |                     | -1.31 | -1.90;-0.71 | 0.90          |
| <b>Reaction Time:</b>                |                     |                     |       |             |               |
| Reaction <sup>log</sup> , ms         | 409.4 (264.9–988.6) | 387.4 (393.0–710.1) | -1.45 | -2.02;-0.88 | 0.68          |
| Movement, ms                         | 417.8 (86.3)        | 412.3 (72.1)        | -0.89 | -1.46;-0.31 | 0.32          |

Normally distributed raw-score variables are shown as mean (SD). Logarithmically transformed variables<sup>log</sup> are shown as arithmetic mean (range). Z-scores and test statistics are given in estimates from a linear mixed model adjusting for education and headache at time of testing and multiple testing. Significant p-values are printed in bold. <sup>a</sup>n=29, as Trail Making Test scores and Verbal Fluency scores from non-native Danish speakers (n=2) were omitted from analysis. <sup>b</sup>: Patients at follow-up compared to healthy controls.

## DISCUSSION

This study is the first to comprehensively explore the cognitive functions in a cohort of more than 10 patients with IHH. We examined 31 patients and found deficits in four of six cognitive domains suggesting that IHH is associated with a global cognitive dysfunction.

Cognitive function in IHH has only been reported in three studies<sup>2-4</sup> in addition to a single case-report<sup>5</sup>. One study<sup>2</sup> examined 85 patients but applied only a single memory test and the methodology was not described in details.. The remaining studies performed more extensive cognitive testing, but in contrast to our study were uncontrolled and included only respectively one, five and 10 patients<sup>3-5</sup> Prior studies were, in addition, based on patients with a wide range of disease duration (6-98 months) and only one study<sup>3</sup> reported ICP at time of testing. Our study is the first to assessed the cognitive function in a well-defined group of patients with newly diagnosed disease (n=29) or relapse (n=2).

While the case-study of Kaplan et al.<sup>5</sup> found no convincing cognitive deficits, Arseni et al.<sup>2</sup> and Kharkar et al.<sup>4</sup> reported substantial deficits in memory. We found deficits in visuospatial memory and in spatial working memory strategy, but detected no overall difference in working memory. Verbal memory (measured by Wecheler Memory Scale) was by far the most affected parameter in the study of Kharkar et al. and similarly was reported moderate to severe in 90% of the patients studied by Arseni et al. Although we did not test verbal memory we found significant deficits in other verbal functions (verbal fluency). This is in line with the study of Sorensen et al.<sup>3</sup> reporting verbal deficits in all of their five patients. Deficits in phonological fluency, which were substantial in our patients, have been shown to relate to frontal lobe damage, reflecting an additional executive component.<sup>11</sup>



1  
2  
3  
4 The most severe deficits in our study were found in the domains of reaction time and processing  
5 speed which is consistent with the study of Sorensen et al.<sup>3</sup> In addition we found significant  
6 impairment in cognitive flexibility. Cognitive flexibility is fundamental for effective decision-  
7 making and the ability to learn and adapt to environmental changes, but has never been tested in  
8 patients with IHH before.  
9

10  
11 Although overall working memory was not affected in our study, patients did score significantly  
12 worse in the working memory strategy. This may reflect an executive component consistent with  
13 other executive deficits detected in our patients.  
14

15  
16 The deficits we detected in the domains of reaction time, processing speed, visuospatial memory and  
17 attention were equivalent to those found in patients with first episode schizophrenia.<sup>12</sup> In addition  
18 deficits in cognitive flexibility were similar to those (measured by Wisconsin Card Sort, a task  
19 conceptionally akin to the Intra-Extra Dimensional Set Shift Test) found in a meta-analysis of  
20 patients with schizophrenia in general.<sup>13</sup> Verbal fluency in our patients was affected to the same  
21 extents as reported for patients with schizophrenia<sup>13</sup> as well as patients with congenital  
22 hydrocephalus.<sup>11</sup> Furthermore deficits in verbal phonological fluency and processing speed  
23 (measured by Symbol Digit Modalities Test) were in the range found in patients with multiple  
24 sclerosis.<sup>14-16</sup>  
25  
26  
27  
28  
29  
30  
31  
32  
33  
34  
35  
36  
37  
38  
39  
40

41 Despite marked improvement in ICP and headache we found no convincing signs of overall  
42 cognitive improvement at the 3- month follow-up as the improvement seen in the visuospatial tests  
43 could be explained by test-retest effect (familiarization with the Rey Osterieith Complex Figure).  
44 Sorensen et al.<sup>3</sup> reported that although signs of cognitive dysfunction were only minor, four of their  
45 five patients were unable to manage work and/or everyday activities. In our study 12 of the 31  
46 patients were either on long-term sick-leave or had reduced and altered work schedule due to IHH at  
47 follow up three months after diagnosis. Short follow-up and co-existent headache-symptoms limit  
48  
49  
50  
51  
52  
53  
54  
55  
56  
57  
58  
59  
60

1  
2  
3  
4 the interpretation of the socioeconomic impact of cognitive dysfunction demonstrated in our study.  
5  
6 However, in other well recognized diseases such as schizophrenia a robust relationship between  
7  
8 global and specific cognitive deficits and functional outcome has been consistently demonstrated.<sup>17,18</sup>  
9  
10 The cause of cognitive impairment in IHH remains speculative. Theories could involve dysfunction of  
11  
12 grey and/or white matter substance due to mechanical compression as proposed in normal pressure  
13  
14 hydrocephalus,<sup>11</sup> dysfunction related to axonal flow as in optic nerve swelling and dysfunction<sup>19</sup> or  
15  
16 release of cytotoxic substances as is seen in other conditions with cognitive decline.<sup>20</sup> Diffuse  
17  
18 cerebral edema has been suggested by some<sup>21,22</sup> but refused by others.<sup>23,24</sup> High resolution imaging  
19  
20 studies are still scarce, but as brain volume seems to be normal in IHH<sup>25</sup> we would expect any  
21  
22 structural change that could explain the cognitive deficits found in this study to be subtle. Further  
23  
24 high-resolution morphological imaging studies thus would be of great interest.  
25  
26  
27

28 The strengths of the study is the prospective and controlled design, the broad range of cognitive tests,  
29  
30 a relatively large study population, and the use of a culturally blind and computerized test battery that  
31  
32 by automatic test conduction and score recording reduced the influence of the non-blinded observer.  
33  
34 In addition the study population was well defined with cognitive testing performed in close relation  
35  
36 to IHH diagnosis and ICP measurement. As patients were enrolled consecutively from both  
37  
38 neurological and ophthalmological departments our study population reflects representative IHH-  
39  
40 patients and not a selected group of cognitively symptomatic patients.  
41  
42

43 We recognize limitations to our study. First, the design was the non-blinded design and we did not  
44  
45 perform retest of healthy controls. Secondly, the follow-up period was relatively short and may very  
46  
47 well explain why we, unlike others,<sup>3</sup> failed to demonstrate improvement in cognitive function. Most  
48  
49 importantly, although we adjusted for many of the most important confounders, our controls were  
50  
51 not matched for BMI, headache or history of depression. The effect of headache on cognitive  
52  
53 function has been debated,<sup>26-28</sup> but a recent comprehensive review concluded that there is no  
54  
55  
56  
57  
58  
59  
60

1  
2  
3  
4 evidence of cognitive dysfunction in patients with migraine in general.<sup>29</sup> On the other hand there  
5  
6 seems to be evidence that *chronic* pain is associated with mild cognitive impairment in selected  
7  
8 domains.<sup>30,31</sup> However, it is unclear if the cognitive impairment is attributed by the pain it self, or  
9  
10 more likely mediated by co-existent depression.<sup>32</sup> Headache was chronic in 10 (32%) of our patients  
11  
12 and depression was reported by eight (26%) patients. Neither depression nor chronic pain was  
13  
14 associated with poorer cognitive performance when compared within the patient group. BMI in our  
15  
16 patients ranged from normal to morbidly obese (24.2 – 48.8 kg/m<sup>2</sup>). Patients with higher BMI did not  
17  
18 perform worse than the less obese. It thus seems less likely that chronic pain, depression or obesity  
19  
20 account for our findings of impaired cognition, but we fully acknowledge that ideally we should have  
21  
22 included control group of obese patients with frequent headache in addition to the healthy subjects.  
23  
24 The wide range of factors potentially affecting performance in cognitive tests, and the great variation  
25  
26 within the patient group makes an ideal match very difficult to achieve. However, a feasible  
27  
28 approach in obtaining phenotypically similar controls could be to recruit subjects with suspected IHH,  
29  
30 but in which the diagnosis is declined after appropriate investigations.  
31  
32  
33

34  
35 In conclusions, this study strongly suggests that IHH is a disabling neurological disorder associated  
36  
37 with cognitive deficits. The results in addition indicate that the cognitive deficits are long-lasting, not  
38  
39 paralleling ICP and headache reduction, and are not sufficiently treated by diuretics and weight loss.  
40  
41 Contrary to our hypothesis executive and memory functions were only moderately affected.  
42  
43 Nevertheless we found substantial deficits in processing speed and reaction time which could explain  
44  
45 some of the difficulties that patients encounter in work and daily activities. A focused  
46  
47 multidisciplinary approach including neuropsychological rehabilitation therefore might be relevant in  
48  
49 the treatment of patients with IHH.  
50  
51  
52  
53  
54  
55  
56  
57  
58  
59  
60

## AKNOWLEDGEMENTS

We thank Winnie G. Nielsen, BA; Lene Elkjær, BA and especially Hanne Andresen, BA for tireless effort and technical assistance during data collection (ICP measurements). We thank neuro-ophthalmologists Marianne Wegener, MD and Steffen Hamann, MD, PhD for thorough neuro-ophthalmological examination and evaluation supporting the diagnosis of IHH in our patients.

## COMPETING INTERESTS

H. Yri has received honoraria for consultant work from Neurocore and a travel grant from Berlin-Chemie Menarini. B. Fagerlund and H. Forchhammer report no disclosures. R. Jensen has received honoraria for lectures and patient leaflets from MSD, Berlin-Chemie Menarini, ATI and Pfizer and serves on medical advisory boards for LindeGas, ATI and Neurocore.

## FUNDING

This work was supported by “Region Hovedstadens Forskningsfond” and “Fonden til Lægevidenskabens Fremme”, grant number 12-375. The funding sources had no role in the study design; in the collection, analysis and interpretation data; in the writing of the report; or in the decision to submit the paper for publication.

## AUTHOR CONTRIBUTION

**HMY** made a substantive intellectual contribute to the design of the study, acquisition, analysis and interpretation of the data, and the drafting and revision of the manuscript.

**BF** made a substantive intellectual contribute to the design of the study, the interpretation of the data and the revision of the manuscript.

1  
2  
3  
4 **HBF** made a substantive intellectual contribute to the design of the study, the interpretation of the  
5  
6 data and the revision of the manuscript.  
7

8 **RHJ** made a substantive intellectual contribute to the conceptualization and design of the study, the  
9  
10 interpretation of the data and the revision of the manuscript.  
11

#### 12 13 14 15 **DATA SHARING STATEMENT**

16  
17 No additional data are available  
18  
19

#### 20 21 22 **EXCLUSIVE LICENCE**

23  
24 The Corresponding Author has the right to grant on behalf of all authors and does grant on behalf of  
25  
26 all authors, an exclusive licence (or non-exclusive for UK Crown Employees) on a worldwide basis  
27  
28 to the BMJ Publishing Group Ltd, and its Licensees to permit this article (if accepted) to be  
29  
30 published in BMJ Open and any other BMJ PGL products and to exploit all subsidiary rights, as set  
31  
32 out in our licence  
33  
34  
35  
36  
37  
38  
39  
40  
41  
42  
43  
44  
45  
46  
47  
48  
49  
50  
51  
52  
53  
54  
55  
56  
57  
58  
59  
60

## REFERENCES

## Reference List

1. Friesner D, Rosenman R, Lobb BM, Tanne E. Idiopathic intracranial hypertension in the USA: the role of obesity in establishing prevalence and healthcare costs. *Obes Rev* 2011;12:e372-e380.
2. Arseni C, Simoca I, Jipescu I, Leventi E, Grecu P, Sima A. Pseudotumor cerebri: risk factors, clinical course, prognostic criteria. *Rom J Neurol Psychiatry* 1992;30:115-132.
3. Sorensen PS, Thomsen AM, Gjerris F. Persistent disturbances of cognitive functions in patients with pseudotumor cerebri. *Acta Neurol Scand* 1986;73:264-268.
4. Kharkar S, Hernandez R, Batra S, Metellus P, Hillis A, Williams MA, Rigamonti D. Cognitive impairment in patients with Pseudotumor Cerebri Syndrome. *Behav Neurol* 2011;24:143-148.
5. Kaplan CP, Miner ME, McGregor JM. Pseudotumour cerebri: risk for cognitive impairment? *Brain Inj* 1997;11:293-303.
6. Friedman DI, Jacobson DM. Diagnostic criteria for idiopathic intracranial hypertension. *Neurology* 2002;59:1492-1495.
7. The International Classification of Headache Disorders, 3rd edition (beta version). *Cephalalgia* 2013;33:629-808.
8. Yri HM, Wegener M, Sander B, Jensen R. Idiopathic intracranial hypertension is not benign: a long-term outcome study. *J Neurol* 2012;259:886-894.

- 1  
2  
3  
4 9. Levaux MN, Potvin S, Sepehry AA, Sablier J, Mendrek A, Stip E. Computerized assessment of  
5  
6 cognition in schizophrenia: promises and pitfalls of CANTAB. *Eur Psychiatry* 2007;22:104-  
7  
8 115.  
9
- 10  
11 10. O'Carroll RE, Prentice N, Murray C, van BM, Ebmeier KP, Goodwin GM. Further evidence  
12  
13 that reading ability is not preserved in Alzheimer's disease. *Br J Psychiatry* 1995;167:659-662.  
14  
15
- 16  
17 11. Iddon JL, Pickard JD, Cross JJ, Griffiths PD, Czosnyka M, Sahakian BJ. Specific patterns of  
18  
19 cognitive impairment in patients with idiopathic normal pressure hydrocephalus and  
20  
21 Alzheimer's disease: a pilot study. *J Neurol Neurosurg Psychiatry* 1999;67:723-732.  
22  
23
- 24  
25 12. Andersen R, Fagerlund B, Rasmussen H, Ebdrup BH, Aggernaes B, Gade A, Oranje B,  
26  
27 Glenthøj B. Cognitive effects of six months of treatment with quetiapine in antipsychotic-naïve  
28  
29 first-episode schizophrenia. *Psychiatry Res* 2011;187:49-54.  
30  
31
- 32  
33 13. Heinrichs RW, Zakzanis KK. Neurocognitive deficit in schizophrenia: a quantitative review of  
34  
35 the evidence. *Neuropsychology* 1998;12:426-445.  
36  
37
- 38  
39 14. Foong J, Rozewicz L, Quaghebeur G, Davie CA, Kartsounis LD, Thompson AJ, Miller DH,  
40  
41 Ron MA. Executive function in multiple sclerosis. The role of frontal lobe pathology. *Brain*  
42  
43 1997;120 ( Pt 1):15-26.  
44
- 45  
46 15. Ruet A, Deloire MS, Charre-Morin J, Hamel D, Brochet B. A new computerised cognitive test  
47  
48 for the detection of information processing speed impairment in multiple sclerosis. *Mult Scler*  
49  
50 Published Online First: 4 Mar 2013. doi: 10.1177/1352458513480251.  
51  
52  
53  
54  
55  
56  
57  
58  
59  
60

- 1  
2  
3  
4 16. Lapshin H, Lanctot KL, O'Connor P, Feinstein A. Assessing the validity of a computer-  
5  
6 generated cognitive screening instrument for patients with multiple sclerosis. *Mult Scler*  
7  
8 Published Online First: 7 May 2013. doi: 10.1177/1352458513488841  
9  
10
- 11  
12 17. Green MF, Kern RS, Braff DL, Mintz J. Neurocognitive deficits and functional outcome in  
13  
14 schizophrenia: are we measuring the "right stuff"? *Schizophr Bull* 2000;26:119-136.  
15
- 16  
17 18. Jaeger J, Tatsuoka C, Berns S, Varadi F, Czobor P, Uzelac S. Associating functional recovery  
18  
19 with neurocognitive profiles identified using partially ordered classification models. *Schizophr*  
20  
21 *Res* 2006;85:40-48.  
22  
23
- 24  
25 19. Tso MO, Hayreh SS. Optic disc edema in raised intracranial pressure. III. A pathologic study of  
26  
27 experimental papilledema. *Arch Ophthalmol* 1977;95:1448-1457.  
28  
29
- 30  
31 20. Beeri MS, Moshier E, Schmeidler J, Godbold J, Uribarri J, Reddy S, Sano M, Grossman HT,  
32  
33 Cai W, Vlassara H, Silverman JM. Serum concentration of an inflammatory glycotoxin,  
34  
35 methylglyoxal, is associated with increased cognitive decline in elderly individuals. *Mech*  
36  
37 *Ageing Dev* 2011;132:583-587.  
38  
39
- 40  
41 21. Moser FG, Hilal SK, Abrams G, Bello JA, Schipper H, Silver AJ. MR imaging of pseudotumor  
42  
43 cerebri. *AJR Am J Roentgenol* 1988;150:903-909.  
44
- 45  
46 22. Gideon P, Sorensen PS, Thomsen C, Stahlberg F, Gjerris F, Henriksen O. Increased brain water  
47  
48 self-diffusion in patients with idiopathic intracranial hypertension. *AJNR Am J Neuroradiol*  
49  
50 1995;16:381-387.  
51  
52
- 53  
54 23. Wall M, Dollar JD, Sadun AA, Kardon R. Idiopathic intracranial hypertension. Lack of  
55  
56 histologic evidence for cerebral edema. *Arch Neurol* 1995;52:141-145.  
57  
58  
59  
60



- 1
- 2
- 3
- 4 24. Joynt RJ, Sahs AL. Brain swelling of unknown cause. *Neurology* 1956;6:801-803.
- 5
- 6
- 7 25. Hoffmann J, Huppertz HJ, Schmidt C, Kunte H, Harms L, Klingebiel R, Wiener E.
- 8 Morphometric and volumetric MRI changes in idiopathic intracranial hypertension.
- 9 *Cephalalgia* 2013.
- 10
- 11
- 12
- 13
- 14 26. Mulder EJ, Linssen WH, Passchier J, Orlebeke JF, de Geus EJ. Interictal and postictal
- 15 cognitive changes in migraine. *Cephalalgia* 1999;19:557-565.
- 16
- 17
- 18
- 19
- 20 27. Schmitz N, Arkink EB, Mulder M, Rubia K, Admiraal-Behloul F, Schoonman GG, Kruit MC,
- 21 Ferrari MD, van Buchem MA. Frontal lobe structure and executive function in migraine
- 22 patients. *Neurosci Lett* 2008;440:92-96.
- 23
- 24
- 25
- 26
- 27
- 28 28. Le PF, Zappala G, Giuffrida S, Lo Bartolo ML, Reggio E, Morana R, Lanaia F. Memory
- 29 disturbances in migraine with and without aura: a strategy problem? *Cephalalgia* 2000;20:475-
- 30 478.
- 31
- 32
- 33
- 34
- 35 29. Rist PM, Kurth T. Migraine and cognitive decline: a topical review. *Headache* 2013;53:589-
- 36 598.
- 37
- 38
- 39
- 40
- 41 30. Block C, Cianfrini L. Neuropsychological and neuroanatomical sequelae of chronic non-
- 42 malignant pain and opioid analgesia. *NeuroRehabilitation* 2013;33:343-366.
- 43
- 44
- 45
- 46 31. Moriarty O, McGuire BE, Finn DP. The effect of pain on cognitive function: a review of
- 47 clinical and preclinical research. *Prog Neurobiol* 2011;93:385-404.
- 48
- 49
- 50
- 51 32. Brown SC, Glass JM, Park DC. The relationship of pain and depression to cognitive function in
- 52 rheumatoid arthritis patients. *Pain* 2002;96:279-284.
- 53
- 54
- 55
- 56
- 57
- 58
- 59
- 60

**FIGURE TITLES AND LEGENDS****Figur 1.**

**Title:** Cognitive deficits in patients with IIH at time of diagnosis

**Legends:** Cognitive function in patients with IIH at time of diagnosis (n=31) shown in standard deviations from healthy controls (z-score). Error bars represent S.E.M. Colors indicate which domain the tests represent. \*p<0.05 \*\*p<0.005 \*\*\*p<0.0005.

**Figure 2.**

**Title:** Cognitive deficits in patients with IIH at time of diagnosis and at follow-up

**Legends:** Changes in test performance from time of diagnosis to follow-up (n=29) in patients with IIH shown in standard deviations from healthy controls (z-score). Error bars represent S.E.M. \*p<0.05 \*\*p<0.005 \*\*\*p<0.001.

1  
2  
3  
4  
5  
6  
7  
8  
9  
10  
11  
12  
13  
14  
15  
16  
17  
18  
19  
20  
21  
22  
23  
24  
25  
26  
27  
28  
29  
30  
31  
32  
33  
34  
35  
36  
37  
38  
39  
40  
41  
42  
43  
44  
45  
46  
47  
48  
49  
50  
51  
52  
53  
54  
55  
56  
57  
58  
59  
60

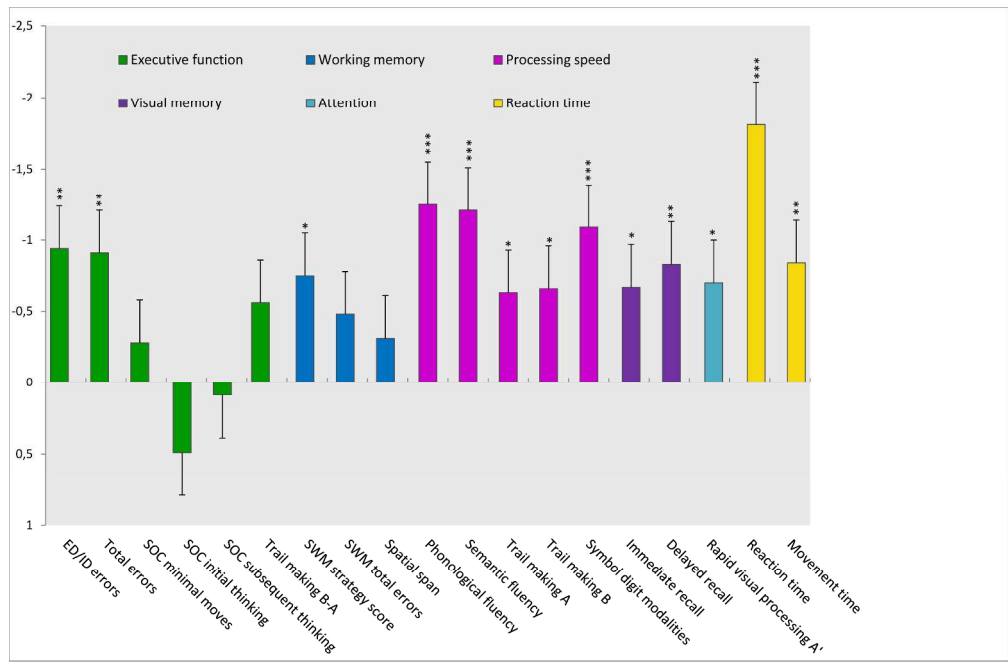

258x169mm (300 x 300 DPI)

Review only

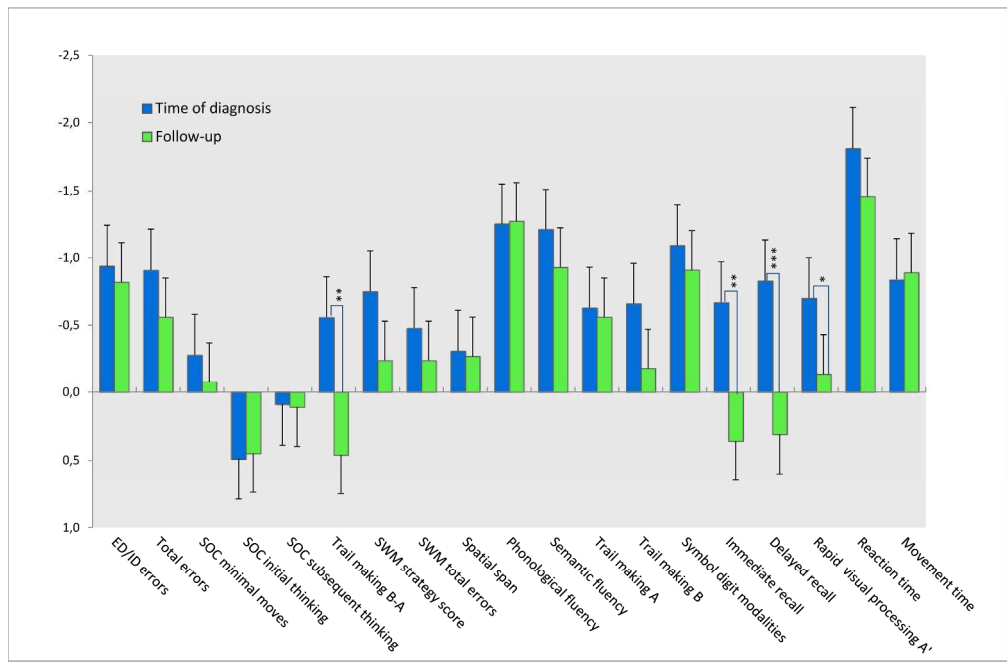

258x169mm (300 x 300 DPI)

Review only

1  
2  
3  
4  
5  
6  
7  
8  
9  
10  
11  
12  
13  
14  
15  
16  
17  
18  
19  
20  
21  
22  
23  
24  
25  
26  
27  
28  
29  
30  
31  
32  
33  
34  
35  
36  
37  
38  
39  
40  
41  
42  
43  
44  
45  
46  
47  
48  
49  
50  
51  
52  
53  
54  
55  
56  
57  
58  
59  
60

STROBE Statement—Checklist of items that should be included in reports of *case-control studies*

|                              | Item No | Recommendation                                                                                                                                                                                                                                                                                                                                                                                                                                                       |
|------------------------------|---------|----------------------------------------------------------------------------------------------------------------------------------------------------------------------------------------------------------------------------------------------------------------------------------------------------------------------------------------------------------------------------------------------------------------------------------------------------------------------|
| <b>Title and abstract</b>    | 1       | (a) Indicate the study's design with a commonly used term in the title or the abstract <a href="#">page 1</a><br>(b) Provide in the abstract an informative and balanced summary of what was done and what was found <a href="#">page 2</a>                                                                                                                                                                                                                          |
| <b>Introduction</b>          |         |                                                                                                                                                                                                                                                                                                                                                                                                                                                                      |
| Background/rationale         | 2       | Explain the scientific background and rationale for the investigation being reported <a href="#">page 4</a>                                                                                                                                                                                                                                                                                                                                                          |
| Objectives                   | 3       | State specific objectives, including any prespecified hypotheses <a href="#">page 4</a>                                                                                                                                                                                                                                                                                                                                                                              |
| <b>Methods</b>               |         |                                                                                                                                                                                                                                                                                                                                                                                                                                                                      |
| Study design                 | 4       | Present key elements of study design early in the paper <a href="#">page 4-5</a>                                                                                                                                                                                                                                                                                                                                                                                     |
| Setting                      | 5       | Describe the setting, locations, and relevant dates, including periods of recruitment, exposure, follow-up, and data collection <a href="#">page 4-5</a>                                                                                                                                                                                                                                                                                                             |
| Participants                 | 6       | (a) Give the eligibility criteria, and the sources and methods of case ascertainment and control selection. Give the rationale for the choice of cases and controls <a href="#">page 4-5</a><br>(b) For matched studies, give matching criteria and the number of controls per case <a href="#">page 4-5</a>                                                                                                                                                         |
| Variables                    | 7       | Clearly define all outcomes, exposures, predictors, potential confounders, and effect modifiers. Give diagnostic criteria, if applicable <a href="#">page 6-8</a>                                                                                                                                                                                                                                                                                                    |
| Data sources/<br>measurement | 8*      | For each variable of interest, give sources of data and details of methods of assessment (measurement). Describe comparability of assessment methods if there is more than one group <a href="#">page 6-7</a>                                                                                                                                                                                                                                                        |
| Bias                         | 9       | Describe any efforts to address potential sources of bias <a href="#">page 7-8</a>                                                                                                                                                                                                                                                                                                                                                                                   |
| Study size                   | 10      | Explain how the study size was arrived at <a href="#">page 4</a>                                                                                                                                                                                                                                                                                                                                                                                                     |
| Quantitative variables       | 11      | Explain how quantitative variables were handled in the analyses. If applicable, describe which groupings were chosen and why <a href="#">page 7-8</a>                                                                                                                                                                                                                                                                                                                |
| Statistical methods          | 12      | (a) Describe all statistical methods, including those used to control for confounding <a href="#">page 7-8</a><br>(b) Describe any methods used to examine subgroups and interactions <a href="#">page 7-8</a><br>(c) Explain how missing data were addressed <a href="#">page 7-8</a><br>(d) If applicable, explain how matching of cases and controls was addressed <a href="#">page 5</a><br>(e) Describe any sensitivity analyses <a href="#">not applicable</a> |
| <b>Results</b>               |         |                                                                                                                                                                                                                                                                                                                                                                                                                                                                      |
| Participants                 | 13*     | (a) Report numbers of individuals at each stage of study—eg numbers potentially eligible, examined for eligibility, confirmed eligible, included in the study, completing follow-up, and analysed <a href="#">page 10,14,15</a><br>(b) Give reasons for non-participation at each stage <a href="#">page 14</a><br>(c) Consider use of a flow diagram <a href="#">not applied</a>                                                                                    |
| Descriptive data             | 14*     | (a) Give characteristics of study participants (eg demographic, clinical, social) and information on exposures and potential confounders <a href="#">page 10-11</a><br>(b) Indicate number of participants with missing data for each variable of interest <a href="#">page 11,13,16</a>                                                                                                                                                                             |
| Outcome data                 | 15*     | Report numbers in each exposure category, or summary measures of exposure <a href="#">page 10,14,15</a>                                                                                                                                                                                                                                                                                                                                                              |
| Main results                 | 16      | (a) Give unadjusted estimates and, if applicable, confounder-adjusted estimates and                                                                                                                                                                                                                                                                                                                                                                                  |

their precision (eg, 95% confidence interval). Make clear which confounders were adjusted for and why they were included [page 10-16](#)

(b) Report category boundaries when continuous variables were categorized [page 10-11](#)

(c) If relevant, consider translating estimates of relative risk into absolute risk for a meaningful time period [not relevant](#)

Other analyses 17 Report other analyses done—eg analyses of subgroups and interactions, and sensitivity analyses [page 14](#)

### Discussion

Key results 18 Summarise key results with reference to study objectives [page 17-20](#)

Limitations 19 Discuss limitations of the study, taking into account sources of potential bias or imprecision. Discuss both direction and magnitude of any potential bias [page 19-20](#)

Interpretation 20 Give a cautious overall interpretation of results considering objectives, limitations, multiplicity of analyses, results from similar studies, and other relevant evidence [page 20](#)

Generalisability 21 Discuss the generalisability (external validity) of the study results [page 18-20](#)

### Other information

Funding 22 Give the source of funding and the role of the funders for the present study and, if applicable, for the original study on which the present article is based [page 21](#)

\*Give information separately for cases and controls.

**Note:** An Explanation and Elaboration article discusses each checklist item and gives methodological background and published examples of transparent reporting. The STROBE checklist is best used in conjunction with this article (freely available on the Web sites of PLoS Medicine at <http://www.plosmedicine.org/>, Annals of Internal Medicine at <http://www.annals.org/>, and Epidemiology at <http://www.epidem.com/>). Information on the STROBE Initiative is available at <http://www.strobe-statement.org>.



**Cognitive function in idiopathic intracranial hypertension —  
a prospective case-control study**

|                                 |                                                                                                                                                                                                                                                                                                                                                                                                                                                        |
|---------------------------------|--------------------------------------------------------------------------------------------------------------------------------------------------------------------------------------------------------------------------------------------------------------------------------------------------------------------------------------------------------------------------------------------------------------------------------------------------------|
| Journal:                        | <i>BMJ Open</i>                                                                                                                                                                                                                                                                                                                                                                                                                                        |
| Manuscript ID:                  | bmjopen-2013-004376.R2                                                                                                                                                                                                                                                                                                                                                                                                                                 |
| Article Type:                   | Research                                                                                                                                                                                                                                                                                                                                                                                                                                               |
| Date Submitted by the Author:   | 18-Feb-2014                                                                                                                                                                                                                                                                                                                                                                                                                                            |
| Complete List of Authors:       | Yri, Hanne; Danish Headache Centre, Department of Neurology, Glostrup Hospital, University of Copenhagen<br>Fagerlund, Birgitte; Center for Neuropsychiatric Schizophrenia Research, Psychiatric Center Glostrup, University of Copenhagen<br>Forchhammer, Hysse; Department of Neurology, Glostrup Hospital, University of Copenhagen<br>Jensen, Rigmor; Danish Headache Centre, Department of Neurology, Glostrup Hospital, University of Copenhagen |
| <b>Primary Subject Heading</b>: | Neurology                                                                                                                                                                                                                                                                                                                                                                                                                                              |
| Secondary Subject Heading:      | Neurology                                                                                                                                                                                                                                                                                                                                                                                                                                              |
| Keywords:                       | MENTAL HEALTH, Adult neurology < NEUROLOGY, Neuro-ophthalmology < NEUROLOGY                                                                                                                                                                                                                                                                                                                                                                            |
|                                 |                                                                                                                                                                                                                                                                                                                                                                                                                                                        |

SCHOLARONE™  
Manuscripts

1  
2  
3  
4 Cognitive function in idiopathic intracranial hypertension— a prospective  
5  
6  
7 case-control study  
8  
9

10 Hanne Maria Yri MD<sup>1</sup>, Birgitte Fagerlund MA, PhD<sup>2</sup>, Hysse Birgitte Forchhammer MA, PhD<sup>3</sup>,  
11 Rigmor Højland Jensen MD, Dr Med Sci<sup>1</sup>  
12  
13

- 14  
15 1. Danish Headache Center, Department of Neurology, Glostrup Hospital, University of  
16 Copenhagen, Denmark.  
17  
18 2. Center for Neuropsychiatric Schizophrenia Research, Psychiatric Center Glostrup, University  
19 of Copenhagen, Denmark  
20  
21 3. Department of Neurology, Glostrup Hospital, University of Copenhagen, Denmark  
22  
23  
24

25  
26 **CORRESPONDING AUTHOR**

27 Rigmor Højland Jensen, Danish Headache Center, Department of Neurology, Glostrup Hospital,  
28 Ndr. Ringvej 69, 2600 Glostrup, Denmark. E-mail: rigmor.jensen@regionh.dk.  
29  
30 Telephone: +45 38 63 30 59. Fax: +45 38 63 30 71  
31  
32  
33  
34  
35

36  
37 **KEY WORDS**

38 Idiopathic intracranial hypertension, pseudotumor cerebri, cognition disorders, case-control studies.  
39  
40  
41  
42

43 **WORD COUNT:** 3210

44  
45 **NUMBER OF REFERENCES:** 29  
46  
47  
48  
49  
50  
51  
52  
53  
54  
55  
56  
57  
58  
59  
60



## ABSTRACT

**Objective:** To explore the extent and nature of cognitive deficits in patients with idiopathic intracranial hypertension at time of diagnosis and after three months of treatment.

**Design:** Prospective case-control study.

**Setting:** Neurological department, ophthalmological department and a tertiary headache referral clinic at a Danish university hospital.

**Participants:** Thirty-one patients with definite idiopathic intracranial hypertension referred from June 2011– February 2013 and included within one week of diagnostic intracranial pressure measurement. Twenty-nine patients completed re-examination at the 3-month follow-up. At time of testing none of the patients took medication potentially affecting cognitive function. Controls were 31 healthy age- and sex-matched volunteers from the local community.

**Outcome measures:** Executive function, working memory, visuospatial memory, processing speed, attention, and reaction time assessed by a comprehensive neuropsychological test battery consisting of validated computerized (Cambridge Neuropsychological Test Automated Battery (CANTAB)) and paper-and-pencil tests.

**Results:** Patients with idiopathic intracranial hypertension performed significantly worse than controls in four of six cognitive domains ( $p \leq 0.02$ ). Deficits were most pronounced in reaction time (1.45 SD below controls 95% CI 2.10 to 0.85) and processing speed (1.48 SD below controls 95% CI 2.08 to 0.81). Despite marked improvement in intracranial pressure and headache, re-examination showed persistent cognitive dysfunction three months after diagnosis and start of treatment.

**Conclusions:** We demonstrate for the first time in a well-defined cohort of patients that idiopathic intracranial hypertension may be associated with cognitive dysfunction. This could explain the functional disability of patients with idiopathic intracranial hypertension. A focused

1  
2  
3  
4 multidisciplinary approach including neuropsychological rehabilitation therefore might be relevant in  
5  
6 the treatment of patients with idiopathic intracranial hypertension.  
7  
8  
9

## 10 11 **ARTICLE SUMMARY**

### 12 13 **Strengths and limitations of this study**

- 14  
15 • The first study to assess a broad range of cognitive functions in more than 10 patients
- 16  
17 • Prospective controlled design and a well defined study population
- 18  
19 • Controls were matched for age, sex and pre-morbid intelligence and in comparisons of  
20  
21 cognitive measures we adjusted for education and headache at time of testing.
- 22  
23 • The study was non-blinded and controls were not matched for Body Mass Index (BMI)
- 24  
25 • Cognitive assessment by an automated computerized test battery reduced the influence of the  
26  
27 non-blinded observer  
28  
29  
30  
31  
32  
33  
34  
35  
36  
37  
38  
39  
40  
41  
42  
43  
44  
45  
46  
47  
48  
49  
50  
51  
52  
53  
54  
55  
56  
57  
58  
59  
60

## INTRODUCTION

Due to predilection for young individuals of working age idiopathic intracranial hypertension (IIH) is a condition with substantial socioeconomic consequences. In USA alone the estimated annual costs exceed \$444 million (> \$17,000 /patient).<sup>1</sup> In addition to direct medical cost the major expenses is loss of wages caused by patients having to give up work or change profession due to IIH. Loss of income due to IIH is reported by 48% of patients,<sup>1</sup> but the exact cause of this substantial disability is yet unknown.

Despite obvious threat to visual function compliance with long-term treatment is often poor. In our clinics we experience a substantial lack of initiative and self-awareness in patients with IIH which has raised the suspicion of prefrontal dysfunction. However, while numerous studies describe the visual and headache-related complications of IIH, very little is known about the cognitive implications of the disease. Except for a single memory test conducted in 85 patients<sup>2</sup> the cognitive function in IIH has only been tested in a few very small study populations.<sup>3-5</sup> In all studies, apart from the case-report by Kaplan et al.,<sup>5</sup> testing revealed significant cognitive deficits in patients with IIH. Especially within verbal tests and memory deficits have been demonstrated.

The aim of this case-control study is to explore in details the extent and nature of cognitive deficits in patients with IIH at time of diagnosis and after three months of treatment.

## METHODS

### Subjects

We recruited 31 consecutive patients with IIH referred to the Department of Neuro-Ophthalmology, the Department of Neurology or the Danish Headache Center, Glostrup Hospital from June 2011–February 2013. Sample size was determined by the number of cases referred in the inclusion period. Twenty-eight of the patients were newly diagnosed with IIH, three patients had well-defined relapse

1  
2  
3  
4 of IHH after a minimum of 10 months (range 10-26 months) of medication-free remission (resolved  
5  
6 headache and papilledema). All patients had definite IHH according to the diagnostic criteria.<sup>6,7</sup> We  
7  
8 included only patients that could be tested within seven days of confirmed diagnosis. Exclusion  
9  
10 criteria were: other disorders or medication that could potentially affect cognition, decreased visual  
11  
12 acuity, or language skills (Danish) deemed insufficient for participation in the cognitive assessment.  
13  
14 Thirty-one healthy and headache free (defined as less than 4 headache days/month) controls,  
15  
16 matched for age and sex, were recruited by advertising at Glostrup Hospital and on the website  
17  
18 forsogspersonen.dk. Healthy controls were tested only once and did not have a lumbar puncture  
19  
20 performed. Otherwise the cognitive examination program for patients and controls was identical.  
21  
22  
23  
24  
25

### 26 **Standard protocol approvals, registration and patients consents**

27  
28 All participants gave written, informed consent to participate in the study. The study was conducted  
29  
30 in accordance with the declaration of Helsinki and approved by the Regional Ethics Committee.  
31  
32  
33  
34

### 35 **General examination**

36  
37 At time of diagnosis patients underwent a complete neurological examination including MR/CT-  
38  
39 imaging with venous sequences. All but one patient underwent thorough standardized neuro-  
40  
41 ophthalmological examination.<sup>8</sup> The remaining patient did not participate in the neuro-  
42  
43 ophthalmological evaluation in spite of numerous invitations. A general ophthalmological  
44  
45 examination was, however, performed at the local referring ophthalmological department.  
46  
47  
48  
49  
50  
51  
52  
53  
54  
55  
56  
57  
58  
59  
60

## Treatment

After diagnostic lumbar puncture and after cognitive testing was completed, treatment with acetazolamide was initiated. From baseline to 3-month follow-up doses were individually adjusted at doses of 750-2225 mg/day. Due to intolerable side effects acetazolamide was replaced by topiramate, 125 mg/day in one patient. Treatment with acetazolamide and topiramate was paused respectively three and seven days before the 3-month follow-up examinations.

Infrequent (<14 days/month) use of simple analgesics (paracetamol and/or acetylsalicylic acid) was allowed. Treatment did not include use of opiate analgesics or tranquilizers.

Weight-loss was strongly recommended and patients were offered dietician consultations.

## ICP

ICP was measured at baseline and at the 3-month follow-up. In one patient ICP was measured by direct intracranial pressure monitoring. In the remaining patients (n=30) ICP was measured by standardized lumbar puncture manometry. Patients were placed in lateral decubital position, had their legs straightened and were given a minimum of 10 min to relax before a stabilized pressure was recorded.

## Cognitive testing

We assessed cognitive function by a neuropsychological test battery of validated computerized (Cambridge Neuropsychological Test Automated Battery (CANTAB))<sup>9</sup> and paper-and-pencil tests.

Paper-and-pencil tests: (a) **Rey – Osterreith's Complex Figure Test**, testing visuospatial memory; (b) **Trail Making Test A and B**, primarily testing psychomotor speed; (c) **Symbol Digit Modalities Test**, testing psychomotor speed; (d) **Verbal Fluency Test**, testing verbal semantic and phonological

1  
2  
3  
4 fluency. The letters “S” and “A” and the categories “animals” and “items in a supermarket” were  
5  
6 used.

7  
8 CANTAB computerized tests: (e) **Motor screening test** to familiarize subjects with the touch screen;  
9  
10 (f) **Spatial Span**, assessing visuospatial working memory span; (g) **Spatial Working Memory**,  
11  
12 testing the ability to retain and manipulate spatial information in working memory; (h) **Stockings of**  
13  
14 **Cambridge**, assessing spatial planning ability; (i) **Intra-Extra Dimensional Set Shift**, testing  
15  
16 cognitive flexibility, requiring the formation and shifting of attentional set; (j) **Reaction Time**,  
17  
18 assessing motor and reaction time latencies; (k) **Rapid Visual Information Processing**, testing  
19  
20 sustained attention with a working memory load.  
21  
22

23  
24 The **Danish Adult Reading Test** (Danish version of the National Adult Reading Test) was applied  
25  
26 as an estimate of premorbid intelligence.<sup>10</sup>  
27

28  
29 The test battery was administered in a fixed order by the same physician (HY), instructed and trained  
30  
31 by experienced neuro-psychologists (HF, BF). To ensure uniform test instructions we used a written  
32  
33 instruction-manual during all sessions. Headache intensity at time of testing was recorded by a 10-  
34  
35 point Visual Analogue Scale (VAS). Patients were re-tested at the 3-month follow-up.  
36  
37

### 38 39 **Statistical analysis**

40  
41 Statistical analyses were conducted using SAS 9.3. Significance levels were set at 0.05. Non-normal  
42  
43 distributed data were logarithmically transformed to reduce skewness. Categorical data were  
44  
45 investigated by Chi-square test, Fishers’ exact test and McNemar test.  
46  
47

48  
49 Test-scores of patients and healthy controls were compared using a linear mixed model adjusting for  
50  
51 education and headache at time of testing. Changes in patient test-scores from baseline to follow-up  
52  
53 were analyzed in a linear mixed model for paired data adjusting for headache at time of testing. Test  
54  
55 performance in patients with normalized ICP at follow-up and patient with continuous elevated ICP  
56  
57  
58  
59  
60

1  
2  
3  
4 was compared in a mixed model using  $ICP \leq 25$  cmH<sub>2</sub>O and  $ICP < 25$  cmH<sub>2</sub>O as a binary categorical  
5  
6 variable. In addition the effect of ICP change (as a continuous variable) on difference in test  
7  
8 performance from baseline to follow-up was analyzed.  
9

10 The effects of depression and chronic pain on cognitive performance within the patient group were  
11 explored in a model comparing subjects with or without these traits, adjusting for education and  
12 headache at time of testing. The effect of BMI was explored in a similar model with BMI as a  
13  
14 continuous variable.  
15

16 To avoid effects of multiple comparisons in the analyses of cognitive function, the analyses were  
17 performed in mixed linear models including all 19 subtest scores into the same model.  
18  
19

20 For comparability of test-scores and evaluation of effect sizes, test-scores were standardized into z-  
21 scores. Z-scores were based on performance of the healthy controls which by definition had a mean  
22 scale score of zero and SD set to one. All scales were computed so that a higher z-score indicate  
23  
24 better performance.  
25  
26

27 We used standardized test-scores to create composite domain scores, calculated by grouping selected  
28 tests, based on which cognitive domain they theoretically represented. Z-scores for cognitive  
29 domains were averaged and re-standardized based on the composite domain average and standard  
30 deviation of healthy controls.  
31  
32

33 Although they spoke Danish fluently, Trail Making Test scores and Verbal Fluency scores from non-  
34 native Danish speakers (n=2) were omitted from statistical analysis as these test are potentially  
35 influenced by language-fluency and familiarity with the Latin alphabet. In domain construction the  
36 average of the remaining tests was used to determine the domain score.  
37  
38  
39  
40  
41  
42  
43  
44  
45  
46  
47  
48  
49  
50  
51  
52  
53  
54  
55  
56  
57  
58  
59  
60

## RESULTS

### Demographics and clinical characteristics at baseline

Patients and healthy controls did not differ in demographics, household income, educational level or premorbid intelligence level (Table 1). However, patient had significantly higher BMI and slightly less education counted in years than healthy controls.

Headache at the time of testing was reported by the majority of patients, but by none of the controls (Table 1). General headache disability in patients was heterogeneous. Eleven patients fulfilled the criteria of chronic headache ( $\geq 15$  days/month for 3 months)<sup>7</sup>, four patients had frequent headache (mean 4.5 days/months)<sup>7</sup>, 13 patients only had headaches in the weeks up until diagnosis and three patients reported no headache at all. Healthy controls reported infrequent headaches with a mean frequency at 0.5 days/month.

Visual fields (Automated perimetry, Humphrey 30-2) were bilaterally normal in 14 patients and normal in at least one eye in another nine patients. Seven patients had mild bilateral peripheral defects. One patient had bilateral concentric defects with remaining 15-20 central degrees of vision. In the cognitive tests this patient performed equally to the average patient. No photophobia or visual disturbances were reported during testing.

Depression (explicitly specified in the standardized interview) was reported by eight (26%). Other co-morbidities included tension-type headache (n=12), migraine (n=7), diabetes (n=2), hypertension (n=2), inflammatory bowel disease (n=2), mild personality disorder (n=1), asthma (n=1), fibromyalgia (n=1), small pineal gland cyst (n=1)(asymptomatic, discovered on routine MR at time of IHH-diagnosis), sequela after monocular central serous chorioretinopathy (n=1), intermittent claudication (n=1), lumbar disc herniation (n=1).

Twenty-two patients were on either short term (n=18) or long-term sick-leave (n=4), five were unemployed and three had retired from work for reasons other than IHH.



**Table 1. Demographics and clinical characteristics for IIH patients at baseline and at follow-up and healthy controls**

|                                                                        | IIH Baseline<br>n=31 | IIH Follow-up<br>n=29 | Controls<br>n=31 | Statistics       |                  |
|------------------------------------------------------------------------|----------------------|-----------------------|------------------|------------------|------------------|
|                                                                        |                      |                       |                  | p <sup>d</sup>   | p <sup>e</sup>   |
| <b>Demographics</b>                                                    |                      |                       |                  |                  |                  |
| Age (SD), <i>years</i>                                                 | 31.0 (11.2)          |                       | 30.7 (11.2)      | 0.91             |                  |
| Gender, <i>f/m</i>                                                     | 31/0                 |                       | 31/0             |                  |                  |
| Danish Adult Reading Test (SD), <i>words</i>                           | 22.9 (6.8)           |                       | 24.8 (5.3)       | 0.15             |                  |
| Education (SD), <i>years</i>                                           | 11.2 (2.2)           |                       | 12.8 (2.1)       | <b>0.001</b>     |                  |
| <u>Educational level</u>                                               |                      |                       |                  |                  | 0.38             |
| Long cycle higher ( $\geq 5$ years), <i>n</i>                          | 0                    |                       | 3                |                  |                  |
| Medium cycle higher (3–5 years), <i>n</i>                              | 4                    |                       | 7                |                  |                  |
| Short cycle higher (<3 years), <i>n</i>                                | 4                    |                       | 4                |                  |                  |
| Vocational upper- secondary, <i>n</i>                                  | 5                    |                       | 3                |                  |                  |
| Student, <i>n</i>                                                      | 10                   |                       | 10               |                  |                  |
| No education, <i>n</i>                                                 | 8                    |                       | 4                |                  |                  |
| <u>Household income</u>                                                |                      |                       |                  |                  | 0.81             |
| High (>DKK 400,000/year), <i>n</i>                                     | 10                   |                       | 8                |                  |                  |
| Middle (DKK 200-400,000/year), <i>n</i>                                | 12                   |                       | 12               |                  |                  |
| Low (<DKK 200,000/year), <i>n</i>                                      | 9                    |                       | 11               |                  |                  |
| <b>Clinical Characteristics</b>                                        |                      |                       |                  |                  |                  |
| BMI (SD), <i>kg/m<sup>2</sup></i>                                      | 35.7 (6.2)           | 34.0 (6.0)            | 23.6 (4.0)       | <b>&lt;0.001</b> | <b>0.009</b>     |
| Headache at time of testing, <i>n (%)</i>                              | 22 (71)              | 14 (48)               | 0                |                  |                  |
| Mean headache intensity (SD), <i>VAS</i>                               | 2.64 (2.3)           | 1.84 (2.4)            |                  |                  | <b>0.01</b>      |
| ICP $\leftrightarrow$ cognitive testing <sup>a</sup> (SD), <i>days</i> | 3 (2.4)              | 1 (1.6)               |                  |                  |                  |
| Mean ICP <sup>b</sup> (SD), <i>cmH<sub>2</sub>O</i>                    | 41.0 (12.6)          | 25.9 (5.5)            |                  |                  | <b>&lt;0.001</b> |
| Memory difficulties <sup>c</sup> , <i>n (%)</i>                        | 17 (55)              | 18 (62)               |                  |                  | 0.42             |

|                                                        |            |         |      |
|--------------------------------------------------------|------------|---------|------|
| Concentration difficulties <sup>c</sup> , <i>n</i> (%) | 20 (65)    | 15 (52) | 0.18 |
| Duration of IHH symptoms (SD), <i>months</i>           | 4.34 (5.4) |         |      |

Chi-square test was used for household income, Fishers' exact test for educational level and McNemars' test for paired categorical variables. 2-tailed T-test was used for numerical variables. Significant p-values are printed in bold. <sup>a</sup>Time-span between ICP measurement and cognitive testing. <sup>b</sup>ICP measured with intracranial pressure monitor (n=1) not included. <sup>c</sup>Subjective difficulties reported by the patients. <sup>p<sup>d</sup></sup>: difference between patients at baseline and healthy controls. <sup>p<sup>e</sup></sup>: difference between patients at baseline and follow-up.

### Cognitive function in patients at baseline

IHH-patients performed significantly worse than controls in four of six cognitive domains and in 13 of 19 subtests (Table 2). The most pronounced deficits were found in the domains of processing speed and reaction time (Figure 1). Even though deficits in executive functions only reached trend levels of significance patients scored significantly worse in the subtest measuring cognitive flexibility (ID/ED errors). Likewise, patients performed significantly worse in the subtest measuring spatial working memory strategy although no overall deficits in working memory was found.

Sub-analyses within the patients group showed no significant difference between patients with or without depression (mean overall test difference 0.05 SD 95% CI -0.42 to 0.53, p=0.83) or with or without chronic headache (mean overall test difference 0.34 SD 95% CI -0.18 to 0.83, p=0.19).

Performance in cognitive tests within the patient group did was not related to BMI (ranging from 24.2 – 48.8 kg/m<sup>2</sup>) (difference pr kg/m<sup>2</sup>: 0.05 SD 95% CI -0.02 to 0.04, p=0.60). Differences for each of the 19 individual subtests variables are specified in Table 4 (data supplement, online only).

**Table 2. Cognitive test scores and composite domain scores at baseline compared to healthy controls**

| Test Variables                              | Raw-scores           |                          | Z-scores and statistics |             |                   |
|---------------------------------------------|----------------------|--------------------------|-------------------------|-------------|-------------------|
|                                             | IIH Baseline<br>n=31 | Healthy Controls<br>n=31 | Z                       | 95% CL      | p                 |
| <b><u>Executive function</u></b>            |                      |                          | -0.61                   | -1.25;0.02  | 0.059             |
| <b>Intra-Extra Dimensional</b>              |                      |                          |                         |             |                   |
| <b>Set Shift</b>                            |                      |                          |                         |             |                   |
| ID/ED Errors <sup>log</sup>                 | 8.1 (0-32)           | 4.0 (0-25)               | -0.94                   | -1.54;-0.35 | <b>0.002</b>      |
| Total errors adjusted <sup>log</sup> , s    | 20.9 (7-177)         | 12.2 (7-55)              | -0.91                   | -1.50;-0.32 | <b>0.003</b>      |
| <b>Stockings of Cambridge</b>               |                      |                          |                         |             |                   |
| Solved in minimum moves                     | 9.61 (2.0)           | 10.19 (1.7)              | -0.28                   | -0.87;0.31  | 0.31              |
| Initial thinking time <sup>log</sup> , s    | 6.5 (2.0-18.3)       | 8.2 (3.1-40.7)           | 0.49                    | -0.11;1.08  | 0.11              |
| Subsequent thinking time <sup>log</sup> , s | 0.013 (0-3.7)        | 0.011 (0-3.0)            | 0.09                    | -0.51;0.68  | 0.77              |
| <b>Trail Making Test<sup>a</sup></b>        |                      |                          |                         |             |                   |
| Trail Making B-A <sup>log</sup> , s         | 39.2 (14.7-101.1)    | 30.62 (16.3-98.4)        | -0.56                   | -1.10;0.09  | 0.07              |
| <b><u>Working memory</u></b>                |                      |                          | -0.56                   | -1.19;0.08  | 0.08              |
| <b>Spatial Working Memory</b>               |                      |                          |                         |             |                   |
| Strategy score <sup>log</sup>               | 29.9 (20-42)         | 24.8 (19-40)             | -0.75                   | -1.35;-0.16 | <b>0.01</b>       |
| Total errors <sup>log</sup>                 | 10.2 (0-79)          | 4.7 (0-70)               | -0.48                   | -1.07;0.12  | 0.11              |
| <b>Spatial Span:</b>                        |                      |                          |                         |             |                   |
| Span length                                 | 6.4 (1.3)            | 7.0 (1.4)                | -0.31                   | -0.90;0.28  | 0.31              |
| <b><u>Processing speed</u></b>              |                      |                          | -1.45                   | -2.08;-0.81 | <b>&lt;0.0001</b> |
| <b>Verbal Fluency<sup>a</sup></b>           |                      |                          |                         |             |                   |
| Letters                                     | 19.4 (7.0)           | 30.3 (8.3)               | -1.25                   | -1.84;-0.65 | <b>&lt;0.0001</b> |
| Categories                                  | 39.8 (9.9)           | 55.5 (12.3)              | -1.21                   | -1.81;-0.61 | <b>&lt;0.0001</b> |

**Trail Making Test<sup>a</sup>**

|                                   |                  |                  |       |             |             |
|-----------------------------------|------------------|------------------|-------|-------------|-------------|
| Trail Making A <sup>log</sup> , s | 31.5 (18.0-68.1) | 25.2 (12.8-51.4) | -0.63 | -1.22;-0.02 | <b>0.04</b> |
|-----------------------------------|------------------|------------------|-------|-------------|-------------|

|                                   |                   |                   |       |             |             |
|-----------------------------------|-------------------|-------------------|-------|-------------|-------------|
| Trail Making B <sup>log</sup> , s | 73.5 (40.9-169.2) | 52.2 (31.2-131.1) | -0.66 | -1.26;-0.07 | <b>0.02</b> |
|-----------------------------------|-------------------|-------------------|-------|-------------|-------------|

**Symbol Digit Modalities**

|                 |             |            |       |             |               |
|-----------------|-------------|------------|-------|-------------|---------------|
| Correct symbols | 47.8 (10.2) | 58.7 (9.0) | -1.09 | -1.68;-0.49 | <b>0.0003</b> |
|-----------------|-------------|------------|-------|-------------|---------------|

**Visuospatial memory**

|  |  |  |       |             |             |
|--|--|--|-------|-------------|-------------|
|  |  |  | -0.74 | -1.32;-0.05 | <b>0.02</b> |
|--|--|--|-------|-------------|-------------|

**Rey-Osterreith Figure**

|                         |            |            |       |             |             |
|-------------------------|------------|------------|-------|-------------|-------------|
| Immediate recall, score | 24.5 (5.4) | 28.0 (4.3) | -0.67 | -1.26;-0.08 | <b>0.03</b> |
|-------------------------|------------|------------|-------|-------------|-------------|

|                       |            |            |       |             |              |
|-----------------------|------------|------------|-------|-------------|--------------|
| Delayed recall, score | 23.8 (5.0) | 28.0 (4.4) | -0.83 | -1.42;-0.24 | <b>0.006</b> |
|-----------------------|------------|------------|-------|-------------|--------------|

**Attention****Rapid Visual Processing**

|                          |           |            |       |             |             |
|--------------------------|-----------|------------|-------|-------------|-------------|
| A' sensitivity to target | 0.9 (0.1) | 0.93 (0.1) | -0.70 | -1.30;-0.11 | <b>0.01</b> |
|--------------------------|-----------|------------|-------|-------------|-------------|

**Reaction time**

|  |  |  |       |             |                   |
|--|--|--|-------|-------------|-------------------|
|  |  |  | -1.48 | -2.10;-0.85 | <b>&lt;0.0001</b> |
|--|--|--|-------|-------------|-------------------|

**Reaction Time:**

|                              |                     |                     |       |             |                   |
|------------------------------|---------------------|---------------------|-------|-------------|-------------------|
| Reaction <sup>log</sup> , ms | 409.4 (264.9-988.6) | 330.0 (247.6-464.1) | -1.81 | -2.40;-1.22 | <b>&lt;0.0001</b> |
|------------------------------|---------------------|---------------------|-------|-------------|-------------------|

|              |              |              |       |             |              |
|--------------|--------------|--------------|-------|-------------|--------------|
| Movement, ms | 417.8 (86.3) | 338.3 (80.1) | -0.84 | -1.43;-0.25 | <b>0.006</b> |
|--------------|--------------|--------------|-------|-------------|--------------|

---

Normally distributed raw-score variables are shown as mean (SD). Logarithmically transformed variables<sup>log</sup> are shown as arithmetic mean (range). Z-scores and test statistics are given in estimates from a linear mixed model adjusting for education and headache at time of testing and multiple testing. Significant p-values are printed in bold. <sup>a</sup>n=29, as Trail Making Test scores and Verbal Fluency scores from non-native Danish speakers (n=2) were omitted from analysis.

### Clinical characteristics at follow-up

In spite of several invitations to attend a follow-up examination two patients dropped out from baseline to follow-up. Clinical characteristics and baseline test-scores in these two patients did not differ from the rest of the patient group.

Twenty-nine patients were reexamined at the 3-month follow-up. One patient refused to have lumbar puncture performed at follow-up. A normalized ICP was found in 14 of the remaining 28 patients.

Less than half of the patients had headache during cognitive re-testing (Table 1). Visual fields were either stable or had improved from baseline.

Fourteen of 31 patients had resumed work/school, 11 patients were now on long-term sick-leave, one patient had reduced and altered work schedule due to IHH and two patients were unemployed.

### Cognitive function at follow-up

After 3-months of treatment statistical significant improvement was detected in two domains (Table 3). Attention scores (RVP A') had practically normalized while performance in visuospatial memory tests improved to a level above performance in healthy controls.

No overall change was detected in the domains of executive function, working memory, processing speed and reaction time (Figure 2). Patients in which ICP had normalized ( $<25$  cmH<sub>2</sub>O) did not perform better than patients in which elevated ICP persisted (ICP $>25$  cmH<sub>2</sub>O) and performance was not significantly associated with intensity or presence/absence of headache during the test. No correlation was found between change in cognitive performance and difference in ICP from baseline.

**Table 3. Cognitive test scores and composite domain scores at follow-up compared to baseline**

| Test Variables                              | Raw-scores        |                 | Z-scores and statistics |             |              |
|---------------------------------------------|-------------------|-----------------|-------------------------|-------------|--------------|
|                                             | IIH Baseline      | IIH Follow-up   | Z <sup>b</sup>          | 95% CL      | p            |
|                                             | n=31              | n=29            |                         |             |              |
| <b><u>Executive function</u></b>            |                   |                 | -0.18                   | -0.77;0.42  | 0.16         |
| <b>Intra-Extra Dimensional</b>              |                   |                 |                         |             |              |
| <b>Set Shift</b>                            |                   |                 |                         |             |              |
| ID/ED Errors <sup>log</sup>                 | 8.1 (0–32)        | 5.8 (1–32)      | -0.82                   | -1.40;-0.25 | 0.77         |
| Total errors adjusted <sup>log</sup> , s    | 20.9 (7–177)      | 14.4 (7–68)     | -0.56                   | -1.14;0.01  | 0.26         |
| <b>Stockings of Cambridge</b>               |                   |                 |                         |             |              |
| Solved in minimum moves                     | 9.61 (2.0)        | 19.9 (2.0)      | -0.08                   | -0.66;0.49  | 0.55         |
| Initial thinking time <sup>log</sup> , s    | 6.5 (2.0–18.3)    | 6.7 (2.5–18.4)  | 0.45                    | -0.14;1.02  | 0.98         |
| Subsequent thinking time <sup>log</sup> , s | 0.013 (0–3.7)     | 0.013 (0–3.7)   | 0.11                    | -0.47;0.68  | 0.85         |
| <b>Trail Making Test<sup>a</sup></b>        |                   |                 |                         |             |              |
| Trail Making B-A <sup>log</sup> , s         | 39.2 (14.7–101.1) | 33.1 (1.3–79.5) | 0.46                    | -0.12;1.05  | <b>0.002</b> |
| <b><u>Working memory</u></b>                |                   |                 | -0.33                   | -0.84;0.18  | 0.44         |
| <b>Spatial Working Memory</b>               |                   |                 |                         |             |              |
| Strategy score <sup>log</sup>               | 29.9 (20-42)      | 27.9 (19–42)    | -0.24                   | -0.81;0.34  | 0.10         |
| Total errors <sup>log</sup>                 | 10.2 (0–79)       | 10.1 (0–61)     | -0.24                   | -0.81;0.34  | 0.50         |
| <b>Spatial Span:</b>                        |                   |                 |                         |             |              |
| Span length                                 | 6.4 (1.3)         | 6.4 (1.3)       | -0.27                   | -0.85;0.31  | 0.96         |
| <b><u>Processing speed</u></b>              |                   |                 | -1.23                   | -1.83;-0.64 | 0.49         |
| <b>Verbal Fluency<sup>a</sup></b>           |                   |                 |                         |             |              |
| Letters                                     | 19.4 (7.0)        | 18.6 (6.6)      | -1.27                   | -1.86;-0.69 | 0.88         |
| Categories                                  | 39.8 (9.9)        | 42.5 (10.8)     | -0.93                   | -1.51;-0.34 | 0.41         |
| <b>Trail Making Test<sup>a</sup></b>        |                   |                 |                         |             |              |

|                                   |                     |                     |       |             |               |
|-----------------------------------|---------------------|---------------------|-------|-------------|---------------|
| Trail Making A <sup>log</sup> , s | 31.5 (18.0–68.1)    | 32.9 (9.8)          | -0.56 | -1.15;0.02  | 0.95          |
| Trail Making B <sup>log</sup> , s | 73.5 (40.9–169.2)   | 66.1 (38.7–125.4)   | -0.18 | -0.79;0.40  | 0.16          |
| <b>Symbol Digit Modalities</b>    |                     |                     |       |             |               |
| Correct symbols                   | 47.8 (10.2)         | 49.1 (12.3)         | -0.91 | -1.49;-0.33 | 0.50          |
| <b><u>Visuospatial memory</u></b> |                     |                     | 0.39  | -0.17;1.02  | <b>0.0005</b> |
| <b>Rey-Osterreith Figure</b>      |                     |                     |       |             |               |
| Immediate recall, score           | 24.5 (5.4)          | 28.9 (4.1)          | 0.36  | -0.22;0.93  | <b>0.002</b>  |
| Delayed recall, score             | 23.8 (5.0)          | 28.8 (3.8)          | 0.31  | -0.26;0.89  | <b>0.0002</b> |
| <b><u>Attention</u></b>           |                     |                     |       |             |               |
| <b>Rapid Visual Processing</b>    |                     |                     |       |             |               |
| A' sensitivity to target          | 0.9 (0.1)           | 0.92 (0.04)         | -0.14 | -0.71;0.43  | <b>0.03</b>   |
| <b><u>Reaction time</u></b>       |                     |                     | -1.31 | -1.90;-0.71 | 0.90          |
| <b>Reaction Time:</b>             |                     |                     |       |             |               |
| Reaction <sup>log</sup> , ms      | 409.4 (264.9–988.6) | 387.4 (393.0–710.1) | -1.45 | -2.02;-0.88 | 0.68          |
| Movement, ms                      | 417.8 (86.3)        | 412.3 (72.1)        | -0.89 | -1.46;-0.31 | 0.32          |

Normally distributed raw-score variables are shown as mean (SD). Logarithmically transformed variables<sup>log</sup> are shown as arithmetic mean (range). Z-scores and test statistics are given in estimates from a linear mixed model adjusting for education and headache at time of testing and multiple testing. Significant p-values are printed in bold. <sup>a</sup>n=29, as Trail Making Test scores and Verbal Fluency scores from non-native Danish speakers (n=2) were omitted from analysis. <sup>b</sup>: Patients at follow-up compared to healthy controls.

## DISCUSSION

This study is the first to comprehensively explore the cognitive functions in a cohort of more than 10 patients with IIH. We examined 31 patients and found deficits in four of six cognitive domains suggesting that IIH is associated with a global cognitive dysfunction.

Cognitive function in IIH has only been reported in three studies<sup>2-4</sup> in addition to a single case-report<sup>5</sup>. One study<sup>2</sup> examined 85 patients but applied only a single memory test and the methodology was not described in details. The remaining studies performed more extensive cognitive testing, but in contrast to our study were uncontrolled and included only respectively one, five and 10 patients<sup>3-5</sup>. Prior studies were, in addition, based on patients with a wide range of disease duration (6-98 months) and only one study<sup>3</sup> reported ICP at time of testing. Our study is the first to assessed the cognitive function in a well-defined group of patients with newly diagnosed disease (n=29) or relapse (n=2).

While the case-study of Kaplan et al.<sup>5</sup> found no convincing cognitive deficits, Arseni et al.<sup>2</sup> and Kharkar et al.<sup>4</sup> reported substantial deficits in memory. We found deficits in visuospatial memory and in spatial working memory strategy, but detected no overall difference in working memory. Verbal memory (measured by Wecheler Memory Scale) was by far the most affected parameter in the study of Kharkar et al. and similarly was reported moderate to severe in 90% of the patients studied by Arseni et al. Although we did not test verbal memory we found significant deficits in other verbal functions (verbal fluency). This is in line with the study of Sorensen et al.<sup>3</sup> reporting verbal deficits in all of their five patients. Deficits in phonological fluency, which were substantial in our patients, have been shown to relate to frontal lobe damage, reflecting an additional executive component.<sup>11</sup>

The most severe deficits in our study were found in the domains of reaction time and processing speed which is consistent with the study of Sorensen et al.<sup>3</sup> In addition we found significant



1  
2  
3  
4 impairment in cognitive flexibility. Cognitive flexibility is fundamental for effective decision-  
5  
6 making and the ability to learn and adapt to environmental changes, but has never been tested in  
7  
8 patients with IHH before.  
9

10 Although overall working memory was not affected in our study, patients did score significantly  
11  
12 worse in the working memory strategy. This may reflect an executive component consistent with  
13  
14 other executive deficits detected in our patients.  
15

16  
17 The deficits we detected in the domains of reaction time, processing speed, visuospatial memory and  
18  
19 attention were equivalent to those found in patients with first episode schizophrenia.<sup>12</sup> In addition  
20  
21 deficits in cognitive flexibility were similar to those (measured by Wisconsin Card Sort, a task  
22  
23 conceptionally akin to the Intra-Extra Dimensional Set Shift Test) found in a meta-analysis of  
24  
25 patients with schizophrenia in general.<sup>13</sup> Verbal fluency in our patients was affected to the same  
26  
27 extents as reported for patients with schizophrenia<sup>13</sup> as well as patients with congenital  
28  
29 hydrocephalus.<sup>11</sup> Furthermore deficits in verbal phonological fluency and processing speed  
30  
31 (measured by Symbol Digit Modalities Test) were in the range found in patients with multiple  
32  
33 sclerosis.<sup>14-16</sup>  
34  
35

36  
37 Despite marked improvement in ICP and headache we found no convincing signs of overall  
38  
39 cognitive improvement at the 3- month follow-up as the improvement seen in the visuospatial tests  
40  
41 could be explained by test-retest effect (familiarization with the Rey Osterieith Complex Figure).  
42  
43 Sorensen et al.<sup>3</sup> reported that although signs of cognitive dysfunction were only minor, four of their  
44  
45 five patients were unable to manage work and/or everyday activities. In our study 12 of the 31  
46  
47 patients were either on long-term sick-leave or had reduced and altered work schedule due to IHH at  
48  
49 follow-up three months after diagnosis. Short follow-up and co-existent headache-symptoms limit  
50  
51 the interpretation of the socioeconomic impact of cognitive dysfunction demonstrated in our study.  
52  
53  
54  
55  
56  
57  
58  
59  
60

1  
2  
3  
4 However, in other well recognized diseases such as schizophrenia a robust relationship between  
5 global and specific cognitive deficits and functional outcome has been consistently demonstrated.<sup>17,18</sup>  
6  
7

8 The cause of cognitive impairment in IHH remains speculative. Theories could involve dysfunction of  
9 grey and/or white matter substance due to mechanical compression as proposed in normal pressure  
10 hydrocephalus,<sup>11</sup> dysfunction related to axonal flow as in optic nerve swelling and dysfunction<sup>19</sup> or  
11 release of cytotoxic substances as is seen in other conditions with cognitive decline.<sup>20</sup> To date there is  
12 no plausible evidence for brain damage in IHH<sup>21</sup> and as brain volume seems to be normal in IHH<sup>22</sup> we  
13 would expect any structural change that could explain the cognitive deficits found in this study to be  
14 subtle.  
15  
16  
17  
18  
19  
20  
21  
22

23 The strengths of the study is the prospective and controlled design, the broad range of cognitive tests,  
24 a relatively large study population, and the use of a culturally blind and computerized test battery that  
25 by automatic test conduction and score recording reduced the influence of the non-blinded observer.  
26  
27 In addition the study population was well defined with cognitive testing performed in close relation  
28 to IHH diagnosis and ICP measurement. As patients were enrolled consecutively from both  
29 neurological and ophthalmological departments our study population reflects representative IHH-  
30 patients and not a selected group of cognitively symptomatic patients.  
31  
32  
33  
34  
35  
36  
37  
38

39 We recognize limitations to our study. First, the design was the non-blinded design and we did not  
40 perform retest of healthy controls. Secondly, the follow-up period was relatively short and may very  
41 well explain why we, unlike others,<sup>3</sup> failed to demonstrate improvement in cognitive function. Most  
42 importantly, although we adjusted for many of the most important confounders, our controls were  
43 not matched for BMI, headache or history of depression. The effect of headache on cognitive  
44 function has been debated,<sup>23-25</sup> but a recent comprehensive review concluded that there is no  
45 evidence of cognitive dysfunction in patients with migraine in general.<sup>26</sup> On the other hand there  
46 seems to be evidence that *chronic* pain is associated with mild cognitive impairment in selected  
47  
48  
49  
50  
51  
52  
53  
54  
55  
56  
57  
58  
59  
60

1  
2  
3  
4 domains.<sup>27,28</sup> However, it is unclear if the cognitive impairment is attributed by the pain it self, or  
5  
6 more likely mediated by co-existent depression.<sup>29</sup> Headache was chronic in 10 (32%) of our patients  
7  
8 and depression was reported by eight (26%) patients. Neither depression nor chronic pain was  
9  
10 associated with poorer cognitive performance when compared within the patient group. BMI in our  
11  
12 patients ranged from normal to morbidly obese (24.2 – 48.8 kg/m<sup>2</sup>). Patients with higher BMI did not  
13  
14 perform worse than the less obese. Although it thus seems less likely that chronic pain, depression or  
15  
16 obesity account for our findings of impaired cognition, sub-analyses were limited by small sample  
17  
18 and statistical uncertainty. We acknowledge that to account for the influence of these potential  
19  
20 confounders we ideally should have included an additional control group of obese patients with  
21  
22 frequent headache. However, the wide range of factors potentially affecting performance in cognitive  
23  
24 tests, and the great variation within the patient group, makes an ideal match very difficult to achieve.  
25  
26 For future studies a feasible approach to this challenge could be to recruit subjects with suspected  
27  
28 IHH, but in which the diagnosis is declined after appropriate investigations.  
29  
30  
31

32  
33 In conclusions, this study strongly suggests that IHH is associated with cognitive deficits. The results  
34  
35 in addition indicate that the cognitive deficits are long-lasting, not paralleling ICP and headache  
36  
37 reduction, and are not sufficiently treated by diuretics and weight loss. Contrary to our hypothesis  
38  
39 executive and memory functions were only moderately affected. Nevertheless we found substantial  
40  
41 deficits in processing speed and reaction time which could explain some of the difficulties that  
42  
43 patients encounter in work and daily activities. A focused multidisciplinary approach including  
44  
45 neuropsychological rehabilitation therefore might be relevant in the treatment of patients with IHH.  
46  
47  
48  
49  
50  
51  
52  
53  
54  
55  
56  
57  
58  
59  
60

## AKNOWLEDGEMENTS

We thank Winnie G. Nielsen, BA; Lene Elkjær, BA and especially Hanne Andresen, BA for tireless effort and technical assistance during data collection (ICP measurements). We thank neuro-ophthalmologists Marianne Wegener, MD and Steffen Hamann, MD, PhD for thorough neuro-ophthalmological examination and evaluation supporting the diagnosis of IHH in our patients.

## FUNDING

This work was supported by “Region Hovedstadens Forskningsfond” and “Fonden til Lægevidenskabens Fremme”, grant number 12-375. The funding sources had no role in the study design; in the collection, analysis and interpretation data; in the writing of the report; or in the decision to submit the paper for publication.

## AUTHOR CONTRIBUTION

**HMY** made a substantive intellectual contribute to the design of the study, acquisition, analysis and interpretation of the data, and the drafting and revision of the manuscript.

**BF** made a substantive intellectual contribute to the design of the study, the interpretation of the data and the revision of the manuscript.

**HBF** made a substantive intellectual contribute to the design of the study, the interpretation of the data and the revision of the manuscript.

**RHJ** made a substantive intellectual contribute to the conceptualization and design of the study, the interpretation of the data and the revision of the manuscript.

## COMPETING INTERESTS

H. Yri has received honoraria for consultant work from Neurocore and a travel grant from Berlin-Chemie Menarini. B. Fagerlund and H. Forchhammer report no disclosures. R. Jensen has received honoraria for lectures and patient leaflets from MSD, Berlin-Chemie Menarini, ATI and Pfizer and serves on medical advisory boards for LindeGas, ATI and Neurocore.

## DATA SHARING STATEMENT

There are no additional unpublished data from the study.

## EXCLUSIVE LICENCE

The Corresponding Author has the right to grant on behalf of all authors and does grant on behalf of all authors, an exclusive licence (or non-exclusive for UK Crown Employees) on a worldwide basis to the BMJ Publishing Group Ltd, and its Licensees to permit this article (if accepted) to be published in BMJ Open and any other BMJ PGL products and to exploit all subsidiary rights, as set out in our licence

## REFERENCES

1. Friesner D, Rosenman R, Lobb BM, et al. Idiopathic intracranial hypertension in the USA: the role of obesity in establishing prevalence and healthcare costs. *Obes Rev* 2011;12:e372-e380.
2. Arseni C, Simoca I, Jipescu I, et al. Pseudotumor cerebri: risk factors, clinical course, prognostic criteria. *Rom J Neurol Psychiatry* 1992;30:115-132.
3. Sorensen PS, Thomsen AM, Gjerris F. Persistent disturbances of cognitive functions in patients with pseudotumor cerebri. *Acta Neurol Scand* 1986;73:264-268.
4. Kharkar S, Hernandez R, Batra S, et al. Cognitive impairment in patients with Pseudotumor Cerebri Syndrome. *Behav Neurol* 2011;24:143-148.
5. Kaplan CP, Miner ME, McGregor JM. Pseudotumour cerebri: risk for cognitive impairment? *Brain Inj* 1997;11:293-303.
6. Friedman DI, Jacobson DM. Diagnostic criteria for idiopathic intracranial hypertension. *Neurology* 2002;59:1492-1495.
7. The International Classification of Headache Disorders, 3rd edition (beta version). *Cephalalgia* 2013;33:629-808.
8. Yri HM, Wegener M, Sander B, et al. Idiopathic intracranial hypertension is not benign: a long-term outcome study. *J Neurol* 2012;259:886-894.
9. Levaux MN, Potvin S, Sepehry AA, et al. Computerized assessment of cognition in schizophrenia: promises and pitfalls of CANTAB. *Eur Psychiatry* 2007;22:104-115.

- 1  
2  
3  
4 10. O'Carroll RE, Prentice N, Murray C, et al. Further evidence that reading ability is not preserved  
5  
6 in Alzheimer's disease. *Br J Psychiatry* 1995;167:659-662.  
7  
8
- 9  
10 11. Iddon JL, Pickard JD, Cross JJ, et al. Specific patterns of cognitive impairment in patients with  
11  
12 idiopathic normal pressure hydrocephalus and Alzheimer's disease: a pilot study. *J Neurol*  
13  
14 *Neurosurg Psychiatry* 1999;67:723-732.  
15  
16
- 17 12. Andersen R, Fagerlund B, Rasmussen H, et al. Cognitive effects of six months of treatment  
18  
19 with quetiapine in antipsychotic-naive first-episode schizophrenia. *Psychiatry Res*  
20  
21 2011;187:49-54.  
22  
23
- 24 13. Heinrichs RW, Zakzanis KK. Neurocognitive deficit in schizophrenia: a quantitative review of  
25  
26 the evidence. *Neuropsychology* 1998;12:426-445.  
27  
28
- 29 14. Foong J, Rozewicz L, Quaghebeur G, et al. Executive function in multiple sclerosis. The role of  
30  
31 frontal lobe pathology. *Brain* 1997;120 ( Pt 1):15-26.  
32  
33
- 34 15. Ruet A, Deloire MS, Charre-Morin J, et al . A new computerised cognitive test for the detection  
35  
36 of information processing speed impairment in multiple sclerosis. *Mult Scler* Published Online  
37  
38 First: 4 Mar 2013. doi: 10.1177/1352458513480251.  
39  
40  
41
- 42 16. Lapshin H, Lanctot KL, O'Connor P, et al. Assessing the validity of a computer-generated  
43  
44 cognitive screening instrument for patients with multiple sclerosis. *Mult Scler* Published  
45  
46 Online First: 7 May 2013. doi: 10.1177/1352458513488841  
47  
48  
49
- 50 17. Green MF, Kern RS, Braff DL, et al. Neurocognitive deficits and functional outcome in  
51  
52 schizophrenia: are we measuring the "right stuff"? *Schizophr Bull* 2000;26:119-136.  
53  
54  
55  
56  
57  
58  
59  
60

- 1  
2  
3  
4 18. Jaeger J, Tatsuoka C, Berns S, et al. Associating functional recovery with neurocognitive  
5 profiles identified using partially ordered classification models. *Schizophr Res* 2006;85:40-48.  
6  
7
- 8  
9 19. Tso MO, Hayreh SS. Optic disc edema in raised intracranial pressure. III. A pathologic study of  
10 experimental papilledema. *Arch Ophthalmol* 1977;95:1448-1457.  
11  
12
- 13 20. Beeri MS, Moshier E, Schmeidler J, et al. Serum concentration of an inflammatory glycotoxin,  
14 methylglyoxal, is associated with increased cognitive decline in elderly individuals. *Mech*  
15 *Ageing Dev* 2011;132:583-587.  
16  
17
- 18 21. Wall M, Dollar JD, Sadun AA, Kardon R. Idiopathic intracranial hypertension. Lack of  
19 histologic evidence for cerebral edema. *Arch Neurol* 1995;52:141-145.  
20  
21
- 22 22. Hoffmann J, Huppertz HJ, Schmidt C, et al. Morphometric and volumetric MRI changes in  
23 idiopathic intracranial hypertension. *Cephalalgia* 2013.  
24  
25
- 26 23. Mulder EJ, Linssen WH, Passchier J, et al. Interictal and postictal cognitive changes in  
27 migraine. *Cephalalgia* 1999;19:557-565.  
28  
29
- 30 24. Schmitz N, Arkink EB, Mulder M, et al. Frontal lobe structure and executive function in  
31 migraine patients. *Neurosci Lett* 2008;440:92-96.  
32  
33
- 34 25. Le PF, Zappala G, Giuffrida S, et al. Memory disturbances in migraine with and without aura: a  
35 strategy problem? *Cephalalgia* 2000;20:475-478.  
36  
37
- 38 26. Rist PM, Kurth T. Migraine and cognitive decline: a topical review. *Headache* 2013;53:589-  
39 598.  
40  
41  
42  
43  
44  
45  
46  
47  
48  
49  
50  
51  
52  
53  
54  
55  
56  
57  
58  
59  
60



- 1  
2  
3  
4 27. Block C, Cianfrini L. Neuropsychological and neuroanatomical sequelae of chronic non-  
5 malignant pain and opioid analgesia. *NeuroRehabilitation* 2013;33:343-366.  
6  
7  
8  
9 28. Moriarty O, McGuire BE, Finn DP. The effect of pain on cognitive function: a review of  
10 clinical and preclinical research. *Prog Neurobiol* 2011;93:385-404.  
11  
12  
13  
14 29. Brown SC, Glass JM, Park DC. The relationship of pain and depression to cognitive function in  
15 rheumatoid arthritis patients. *Pain* 2002;96:279-284.  
16  
17  
18  
19  
20  
21  
22  
23  
24  
25  
26  
27  
28  
29  
30  
31  
32  
33  
34  
35  
36  
37  
38  
39  
40  
41  
42  
43  
44  
45  
46  
47  
48  
49  
50  
51  
52  
53  
54  
55  
56  
57  
58  
59  
60

**FIGURE TITLES AND LEGENDS****Figure 1.**

**Title:** Cognitive deficits in patients with IIH at time of diagnosis

**Legends:** Cognitive function in patients with IIH at time of diagnosis (n=31) shown in standard deviations from healthy controls (z-score). Error bars represent S.E.M. Colors indicate which domain the tests represent. \*p<0.05 \*\*p<0.005 \*\*\*p<0.0005.

**Figure 2.**

**Title:** Cognitive deficits in patients with IIH at time of diagnosis and at follow-up

**Legends:** Changes in test performance from time of diagnosis to follow-up (n=29) in patients with IIH shown in standard deviations from healthy controls (z-score). Error bars represent S.E.M. \*p<0.05 \*\*p<0.005 \*\*\*p<0.001.

## Cognitive function in idiopathic intracranial hypertension— a prospective case-control study

Hanne Maria Yri MD<sup>1</sup>, Birgitte Fagerlund MA, PhD<sup>2</sup>, Hysse Birgitte Forchhammer MA, PhD<sup>3</sup>, Rigmor Højland Jensen MD, Dr Med Sci<sup>1</sup>

1. Danish Headache Center, Department of Neurology, Glostrup Hospital, University of Copenhagen, Denmark.
2. Center for Neuropsychiatric Schizophrenia Research, Psychiatric Center Glostrup, University of Copenhagen, Denmark
3. Department of Neurology, Glostrup Hospital, University of Copenhagen, Denmark

### CORRESPONDING AUTHOR

Rigmor Højland Jensen, Danish Headache Center, Department of Neurology, Glostrup Hospital,

Ndr. Ringvej 69, 2600 Glostrup, Denmark. E-mail: rigmor.jensen@regionh.dk.

Telephone: +45 38 63 30 59. Fax: +45 38 63 30 71

### KEY WORDS

Idiopathic intracranial hypertension, pseudotumor cerebri, cognition disorders, case-control studies.

**WORD COUNT:** 3210

**NUMBER OF REFERENCES:** 29

**ABSTRACT**

**Objective:** To explore the extent and nature of cognitive deficits in patients with idiopathic intracranial hypertension at time of diagnosis and after three months of treatment.

**Design:** Prospective case-control study.

**Setting:** Neurological department, ophthalmological department and a tertiary headache referral clinic at a Danish university hospital.

**Participants:** Thirty-one patients with definite idiopathic intracranial hypertension referred from June 2011– February 2013 and included within one week of diagnostic intracranial pressure measurement. Twenty-nine patients completed re-examination at the 3-month follow-up. At time of testing none of the patients took medication potentially affecting cognitive function. Controls were 31 healthy age- and sex-matched volunteers from the local community.

**Outcome measures:** Executive function, working memory, visuospatial memory, processing speed, attention, and reaction time assessed by a comprehensive neuropsychological test battery consisting of validated computerized (Cambridge Neuropsychological Test Automated Battery (CANTAB)) and paper-and-pencil tests.

**Results:** Patients with idiopathic intracranial hypertension performed significantly worse than controls in four of six cognitive domains ( $p \leq 0.02$ ). Deficits were most pronounced in reaction time (1.45 SD below controls 95% CI 2.10 to 0.85) and processing speed (1.48 SD below controls 95% CI 2.08 to 0.81). Despite marked improvement in intracranial pressure and headache, re-examination showed persistent cognitive dysfunction three months after diagnosis and start of treatment.

**Conclusions:** We demonstrate for the first time in a well-defined cohort of patients that idiopathic intracranial hypertension may be associated with cognitive dysfunction. This could explain the functional disability of patients with idiopathic intracranial hypertension. A focused

1  
2  
3  
4 multidisciplinary approach including neuropsychological rehabilitation therefore might be relevant in  
5  
6 the treatment of patients with idiopathic intracranial hypertension.  
7  
8  
9

## 10 11 **ARTICLE SUMMARY**

### 12 13 **Strengths and limitations of this study**

- 14  
15 • The first study to assess a broad range of cognitive functions in more than 10 patients
- 16  
17 • Prospective controlled design and a well defined study population
- 18  
19 • Controls were matched for age, sex and pre-morbid intelligence and in comparisons of  
20  
21 cognitive measures we adjusted for education and headache at time of testing.
- 22  
23 • The study was non-blinded and controls were not matched for Body Mass Index (BMI)
- 24  
25 • Cognitive assessment by an automated computerized test battery reduced the influence of the  
26  
27 non-blinded observer  
28  
29  
30  
31  
32  
33  
34  
35  
36  
37  
38  
39  
40  
41  
42  
43  
44  
45  
46  
47  
48  
49  
50  
51  
52  
53  
54  
55  
56  
57  
58  
59  
60

## INTRODUCTION

Due to predilection for young individuals of working age idiopathic intracranial hypertension (IIH) is a condition with substantial socioeconomic consequences. In USA alone the estimated annual costs exceed \$444 million (> \$17,000 /patient).<sup>1</sup> In addition to direct medical cost the major expenses is loss of wages caused by patients having to give up work or change profession due to IIH. Loss of income due to IIH is reported by 48% of patients,<sup>1</sup> but the exact cause of this substantial disability is yet unknown.

Despite obvious threat to visual function compliance with long-term treatment is often poor. In our clinics we experience a substantial lack of initiative and self-awareness in patients with IIH which has raised the suspicion of prefrontal dysfunction. However, while numerous studies describe the visual and headache-related complications of IIH, very little is known about the cognitive implications of the disease. Except for a single memory test conducted in 85 patients<sup>2</sup> the cognitive function in IIH has only been tested in a few very small study populations.<sup>3-5</sup> In all studies, apart from the case-report by Kaplan et al.,<sup>5</sup> testing revealed significant cognitive deficits in patients with IIH. Especially within verbal tests and memory deficits have been demonstrated.

The aim of this case-control study is to explore in details the extent and nature of cognitive deficits in patients with IIH at time of diagnosis and after three months of treatment.

## METHODS

### Subjects

We recruited 31 consecutive patients with IIH referred to the Department of Neuro-Ophthalmology, the Department of Neurology or the Danish Headache Center, Glostrup Hospital from June 2011–February 2013. Sample size was determined by the number of cases referred in the inclusion period. Twenty-eight of the patients were newly diagnosed with IIH, three patients had well-defined relapse

1  
2  
3  
4 of IIH after a minimum of 10 months (range 10-26 months) of medication-free remission (resolved  
5 headache and papilledema). All patients had definite IIH according to the diagnostic criteria.<sup>6,7</sup> We  
6 included only patients that could be tested within seven days of confirmed diagnosis. Exclusion  
7 criteria were: other disorders or medication that could potentially affect cognition, decreased visual  
8 acuity, or language skills (Danish) deemed insufficient for participation in the cognitive assessment.  
9 Thirty-one healthy and headache free (defined as less than 4 headache days/month) controls,  
10 matched for age and sex, were recruited by advertising at Glostrup Hospital and on the website  
11 forsogspersonen.dk. Healthy controls were tested only once and did not have a lumbar puncture  
12 performed. Otherwise the cognitive examination program for patients and controls was identical.  
13  
14  
15  
16  
17  
18  
19  
20  
21  
22  
23  
24  
25

#### 26 **Standard protocol approvals, registration and patients consents**

27  
28 All participants gave written, informed consent to participate in the study. The study was conducted  
29 in accordance with the declaration of Helsinki and approved by the Regional Ethics Committee.  
30  
31  
32  
33  
34

#### 35 **General examination**

36  
37 At time of diagnosis patients underwent a complete neurological examination including MR/CT-  
38 imaging with venous sequences. All but one patient underwent thorough standardized neuro-  
39 ophthalmological examination.<sup>8</sup> The remaining patient did not participate in the neuro-  
40 ophthalmological evaluation in spite of numerous invitations. A general ophthalmological  
41 examination was, however, performed at the local referring ophthalmological department.  
42  
43  
44  
45  
46  
47  
48  
49  
50  
51  
52  
53  
54  
55  
56  
57  
58  
59  
60

## Treatment

After diagnostic lumbar puncture and after cognitive testing was completed, treatment with acetazolamide was initiated. From baseline to 3-month follow-up doses were individually adjusted at doses of 750-2225 mg/day. Due to intolerable side effects acetazolamide was replaced by topiramate, 125 mg/day in one patient. Treatment with acetazolamide and topiramate was paused respectively three and seven days before the 3-month follow-up examinations.

Infrequent (<14 days/month) use of simple analgesics (paracetamol and/or acetylsalicylic acid) was allowed. Treatment did not include use of opiate analgesics or tranquilizers.

Weight-loss was strongly recommended and patients were offered dietician consultations.

## ICP

ICP was measured at baseline and at the 3-month follow-up. In one patient ICP was measured by direct intracranial pressure monitoring. In the remaining patients (n=30) ICP was measured by standardized lumbar puncture manometry. Patients were placed in lateral decubital position, had their legs straightened and were given a minimum of 10 min to relax before a stabilized pressure was recorded.

## Cognitive testing

We assessed cognitive function by a neuropsychological test battery of validated computerized (Cambridge Neuropsychological Test Automated Battery (CANTAB))<sup>9</sup> and paper-and-pencil tests.

Paper-and-pencil tests: (a) **Rey – Osterreith's Complex Figure Test**, testing visuospatial memory;

(b) **Trail Making Test A and B**, primarily testing psychomotor speed; (c) **Symbol Digit Modalities**

**Test**, testing psychomotor speed; (d) **Verbal Fluency Test**, testing verbal semantic and phonological



1  
2  
3  
4 fluency. The letters “S” and “A” and the categories “animals” and “items in a supermarket” were  
5  
6 used.

7  
8 CANTAB computerized tests: (e) **Motor screening test** to familiarize subjects with the touch screen;  
9  
10 (f) **Spatial Span**, assessing visuospatial working memory span; (g) **Spatial Working Memory**,  
11  
12 testing the ability to retain and manipulate spatial information in working memory; (h) **Stockings of**  
13  
14 **Cambridge**, assessing spatial planning ability; (i) **Intra-Extra Dimensional Set Shift**, testing  
15  
16 cognitive flexibility, requiring the formation and shifting of attentional set; (j) **Reaction Time**,  
17  
18 assessing motor and reaction time latencies; (k) **Rapid Visual Information Processing**, testing  
19  
20 sustained attention with a working memory load.  
21  
22

23  
24 The **Danish Adult Reading Test** (Danish version of the National Adult Reading Test) was applied  
25  
26 as an estimate of premorbid intelligence.<sup>10</sup>  
27

28  
29 The test battery was administered in a fixed order by the same physician (HY), instructed and trained  
30  
31 by experienced neuro-psychologists (HF, BF). To ensure uniform test instructions we used a written  
32  
33 instruction-manual during all sessions. Headache intensity at time of testing was recorded by a 10-  
34  
35 point Visual Analogue Scale (VAS). Patients were re-tested at the 3-month follow-up.  
36  
37

### 38 39 **Statistical analysis**

40  
41 Statistical analyses were conducted using SAS 9.3. Significance levels were set at 0.05. Non-normal  
42  
43 distributed data were logarithmically transformed to reduce skewness. Categorical data were  
44  
45 investigated by Chi-square test, Fishers’ exact test and McNemar test.  
46  
47

48  
49 Test-scores of patients and healthy controls were compared using a linear mixed model adjusting for  
50  
51 education and headache at time of testing. Changes in patient test-scores from baseline to follow-up  
52  
53 were analyzed in a linear mixed model for paired data adjusting for headache at time of testing. Test  
54  
55 performance in patients with normalized ICP at follow-up and patient with continuous elevated ICP  
56  
57  
58  
59  
60

1  
2  
3  
4 was compared in a mixed model using  $ICP \leq 25$  cmH<sub>2</sub>O and  $ICP < 25$  cmH<sub>2</sub>O as a binary categorical  
5  
6 variable. In addition the effect of ICP change (as a continuous variable) on difference in test  
7  
8 performance from baseline to follow-up was analyzed.  
9

10 The effects of depression and chronic pain on cognitive performance within the patient group were  
11 explored in a model comparing subjects with or without these traits, adjusting for education and  
12 headache at time of testing. The effect of BMI was explored in a similar model with BMI as a  
13  
14 continuous variable.  
15

16 To avoid effects of multiple comparisons in the analyses of cognitive function, the analyses were  
17 performed in mixed linear models including all 19 subtest scores into the same model.  
18  
19

20 For comparability of test-scores and evaluation of effect sizes, test-scores were standardized into z-  
21 scores. Z-scores were based on performance of the healthy controls which by definition had a mean  
22 scale score of zero and SD set to one. All scales were computed so that a higher z-score indicate  
23  
24 better performance.  
25  
26

27 We used standardized test-scores to create composite domain scores, calculated by grouping selected  
28 tests, based on which cognitive domain they theoretically represented. Z-scores for cognitive  
29 domains were averaged and re-standardized based on the composite domain average and standard  
30 deviation of healthy controls.  
31  
32

33 Although they spoke Danish fluently, Trail Making Test scores and Verbal Fluency scores from non-  
34 native Danish speakers (n=2) were omitted from statistical analysis as these test are potentially  
35 influenced by language-fluency and familiarity with the Latin alphabet. In domain construction the  
36 average of the remaining tests was used to determine the domain score.  
37  
38  
39  
40  
41  
42  
43  
44  
45  
46  
47  
48  
49  
50  
51  
52  
53  
54  
55  
56  
57  
58  
59  
60

## RESULTS

### Demographics and clinical characteristics at baseline

Patients and healthy controls did not differ in demographics, household income, educational level or premorbid intelligence level (Table 1). However, patient had significantly higher BMI and slightly less education counted in years than healthy controls.

Headache at the time of testing was reported by the majority of patients, but by none of the controls (Table 1). General headache disability in patients was heterogeneous. Eleven patients fulfilled the criteria of chronic headache ( $\geq 15$  days/month for 3 months)<sup>7</sup>, four patients had frequent headache (mean 4.5 days/months)<sup>7</sup>, 13 patients only had headaches in the weeks up until diagnosis and three patients reported no headache at all. Healthy controls reported infrequent headaches with a mean frequency at 0.5 days/month.

Visual fields (Automated perimetry, Humphrey 30-2) were bilaterally normal in 14 patients and normal in at least one eye in another nine patients. Seven patients had mild bilateral peripheral defects. One patient had bilateral concentric defects with remaining 15-20 central degrees of vision. In the cognitive tests this patient performed equally to the average patient. No photophobia or visual disturbances were reported during testing.

Depression (explicitly specified in the standardized interview) was reported by eight (26%). Other co-morbidities included tension-type headache (n=12), migraine (n=7), diabetes (n=2), hypertension (n=2), inflammatory bowel disease (n=2), mild personality disorder (n=1), asthma (n=1), fibromyalgia (n=1), small pineal gland cyst (n=1)(asymptomatic, discovered on routine MR at time of IHH-diagnosis), sequela after monocular central serous chorioretinopathy (n=1), intermittent claudication (n=1), lumbar disc herniation (n=1).

Twenty-two patients were on either short term (n=18) or long-term sick-leave (n=4), five were unemployed and three had retired from work for reasons other than IHH.

**Table 1. Demographics and clinical characteristics for IHH patients at baseline and at follow-up and healthy controls**

|                                                        | IHH Baseline<br>n=31 | IHH Follow-up<br>n=29 | Controls<br>n=31 | Statistics       |                  |
|--------------------------------------------------------|----------------------|-----------------------|------------------|------------------|------------------|
|                                                        |                      |                       |                  | p <sup>d</sup>   | p <sup>e</sup>   |
| <b>Demographics</b>                                    |                      |                       |                  |                  |                  |
| Age (SD), <i>years</i>                                 | 31.0 (11.2)          |                       | 30.7 (11.2)      | 0.91             |                  |
| Gender, <i>f/m</i>                                     | 31/0                 |                       | 31/0             |                  |                  |
| Danish Adult Reading Test (SD), <i>words</i>           | 22.9 (6.8)           |                       | 24.8 (5.3)       | 0.15             |                  |
| Education (SD), <i>years</i>                           | 11.2 (2.2)           |                       | 12.8 (2.1)       | <b>0.001</b>     |                  |
| <u>Educational level</u>                               |                      |                       |                  |                  | 0.38             |
| Long cycle higher ( $\geq 5$ years), <i>n</i>          | 0                    |                       | 3                |                  |                  |
| Medium cycle higher (3–5 years), <i>n</i>              | 4                    |                       | 7                |                  |                  |
| Short cycle higher (<3 years), <i>n</i>                | 4                    |                       | 4                |                  |                  |
| Vocational upper- secondary, <i>n</i>                  | 5                    |                       | 3                |                  |                  |
| Student, <i>n</i>                                      | 10                   |                       | 10               |                  |                  |
| No education, <i>n</i>                                 | 8                    |                       | 4                |                  |                  |
| <u>Household income</u>                                |                      |                       |                  |                  | 0.81             |
| High (>DKK 400,000/year), <i>n</i>                     | 10                   |                       | 8                |                  |                  |
| Middle (DKK 200-400,000/year), <i>n</i>                | 12                   |                       | 12               |                  |                  |
| Low (<DKK 200,000/year), <i>n</i>                      | 9                    |                       | 11               |                  |                  |
| <b>Clinical Characteristics</b>                        |                      |                       |                  |                  |                  |
| BMI (SD), <i>kg/m<sup>2</sup></i>                      | 35.7 (6.2)           | 34.0 (6.0)            | 23.6 (4.0)       | <b>&lt;0.001</b> | <b>0.009</b>     |
| Headache at time of testing, <i>n (%)</i>              | 22 (71)              | 14 (48)               | 0                |                  |                  |
| Mean headache intensity (SD), <i>VAS</i>               | 2.64 (2.3)           | 1.84 (2.4)            |                  |                  | <b>0.01</b>      |
| ICP ↔ cognitive testing <sup>a</sup> (SD), <i>days</i> | 3 (2.4)              | 1 (1.6)               |                  |                  |                  |
| Mean ICP <sup>b</sup> (SD), <i>cmH<sub>2</sub>O</i>    | 41.0 (12.6)          | 25.9 (5.5)            |                  |                  | <b>&lt;0.001</b> |
| Memory difficulties <sup>c</sup> , <i>n (%)</i>        | 17 (55)              | 18 (62)               |                  |                  | 0.42             |

|                                                        |            |         |      |
|--------------------------------------------------------|------------|---------|------|
| Concentration difficulties <sup>c</sup> , <i>n</i> (%) | 20 (65)    | 15 (52) | 0.18 |
| Duration of IHH symptoms (SD), <i>months</i>           | 4.34 (5.4) |         |      |

Chi-square test was used for household income, Fishers' exact test for educational level and McNemars' test for paired categorical variables. 2-tailed T-test was used for numerical variables. Significant p-values are printed in bold. <sup>a</sup>Time-span between ICP measurement and cognitive testing. <sup>b</sup>ICP measured with intracranial pressure monitor (n=1) not included. <sup>c</sup>Subjective difficulties reported by the patients. <sup>p<sup>d</sup></sup>: difference between patients at baseline and healthy controls. <sup>p<sup>e</sup></sup>: difference between patients at baseline and follow-up.

### Cognitive function in patients at baseline

IHH-patients performed significantly worse than controls in four of six cognitive domains and in 13 of 19 subtests (Table 2). The most pronounced deficits were found in the domains of processing speed and reaction time (Figure 1). Even though deficits in executive functions only reached trend levels of significance patients scored significantly worse in the subtest measuring cognitive flexibility (ID/ED errors). Likewise, patients performed significantly worse in the subtest measuring spatial working memory strategy although no overall deficits in working memory was found.

Sub-analyses within the patients group showed no significant difference between patients with or without depression (mean overall test difference 0.05 SD 95% CI -0.42 to 0.53,  $p=0.83$ ) or with or without chronic headache (mean overall test difference 0.34 SD 95% CI -0.18 to 0.83,  $p=0.19$ ).

Performance in cognitive tests within the patient group did was not related to BMI (ranging from 24.2 – 48.8 kg/m<sup>2</sup>) (difference pr kg/m<sup>2</sup>: 0.05 SD 95% CI -0.02 to 0.04,  $p=0.60$ ). Differences for each of the 19 individual subtests variables are specified in Table 4 (data supplement, online only).

**Table 2. Cognitive test scores and composite domain scores at baseline compared to healthy controls**

| Test Variables                              | Raw-scores           |                          | Z-scores and statistics |             |                   |
|---------------------------------------------|----------------------|--------------------------|-------------------------|-------------|-------------------|
|                                             | IIH Baseline<br>n=31 | Healthy Controls<br>n=31 | Z                       | 95% CL      | p                 |
| <b><u>Executive function</u></b>            |                      |                          | -0.61                   | -1.25;0.02  | 0.059             |
| <b>Intra-Extra Dimensional</b>              |                      |                          |                         |             |                   |
| <b>Set Shift</b>                            |                      |                          |                         |             |                   |
| ID/ED Errors <sup>log</sup>                 | 8.1 (0-32)           | 4.0 (0-25)               | -0.94                   | -1.54;-0.35 | <b>0.002</b>      |
| Total errors adjusted <sup>log</sup> , s    | 20.9 (7-177)         | 12.2 (7-55)              | -0.91                   | -1.50;-0.32 | <b>0.003</b>      |
| <b>Stockings of Cambridge</b>               |                      |                          |                         |             |                   |
| Solved in minimum moves                     | 9.61 (2.0)           | 10.19 (1.7)              | -0.28                   | -0.87;0.31  | 0.31              |
| Initial thinking time <sup>log</sup> , s    | 6.5 (2.0-18.3)       | 8.2 (3.1-40.7)           | 0.49                    | -0.11;1.08  | 0.11              |
| Subsequent thinking time <sup>log</sup> , s | 0.013 (0-3.7)        | 0.011 (0-3.0)            | 0.09                    | -0.51;0.68  | 0.77              |
| <b>Trail Making Test<sup>a</sup></b>        |                      |                          |                         |             |                   |
| Trail Making B-A <sup>log</sup> , s         | 39.2 (14.7-101.1)    | 30.62 (16.3-98.4)        | -0.56                   | -1.10;0.09  | 0.07              |
| <b><u>Working memory</u></b>                |                      |                          | -0.56                   | -1.19;0.08  | 0.08              |
| <b>Spatial Working Memory</b>               |                      |                          |                         |             |                   |
| Strategy score <sup>log</sup>               | 29.9 (20-42)         | 24.8 (19-40)             | -0.75                   | -1.35;-0.16 | <b>0.01</b>       |
| Total errors <sup>log</sup>                 | 10.2 (0-79)          | 4.7 (0-70)               | -0.48                   | -1.07;0.12  | 0.11              |
| <b>Spatial Span:</b>                        |                      |                          |                         |             |                   |
| Span length                                 | 6.4 (1.3)            | 7.0 (1.4)                | -0.31                   | -0.90;0.28  | 0.31              |
| <b><u>Processing speed</u></b>              |                      |                          | -1.45                   | -2.08;-0.81 | <b>&lt;0.0001</b> |
| <b>Verbal Fluency<sup>a</sup></b>           |                      |                          |                         |             |                   |
| Letters                                     | 19.4 (7.0)           | 30.3 (8.3)               | -1.25                   | -1.84;-0.65 | <b>&lt;0.0001</b> |
| Categories                                  | 39.8 (9.9)           | 55.5 (12.3)              | -1.21                   | -1.81;-0.61 | <b>&lt;0.0001</b> |

|                                      |                     |                     |       |             |                   |  |
|--------------------------------------|---------------------|---------------------|-------|-------------|-------------------|--|
| <b>Trail Making Test<sup>a</sup></b> |                     |                     |       |             |                   |  |
| Trail Making A <sup>log, s</sup>     | 31.5 (18.0-68.1)    | 25.2 (12.8-51.4)    | -0.63 | -1.22;-0.02 | <b>0.04</b>       |  |
| Trail Making B <sup>log, s</sup>     | 73.5 (40.9-169.2)   | 52.2 (31.2-131.1)   | -0.66 | -1.26;-0.07 | <b>0.02</b>       |  |
| <b>Symbol Digit Modalities</b>       |                     |                     |       |             |                   |  |
| Correct symbols                      | 47.8 (10.2)         | 58.7 (9.0)          | -1.09 | -1.68;-0.49 | <b>0.0003</b>     |  |
| <b><u>Visuospatial memory</u></b>    |                     |                     | -0.74 | -1.32;-0.05 | <b>0.02</b>       |  |
| <b>Rey-Osterreith Figure</b>         |                     |                     |       |             |                   |  |
| Immediate recall, <i>score</i>       | 24.5 (5.4)          | 28.0 (4.3)          | -0.67 | -1.26;-0.08 | <b>0.03</b>       |  |
| Delayed recall, <i>score</i>         | 23.8 (5.0)          | 28.0 (4.4)          | -0.83 | -1.42;-0.24 | <b>0.006</b>      |  |
| <b><u>Attention</u></b>              |                     |                     |       |             |                   |  |
| <b>Rapid Visual Processing</b>       |                     |                     |       |             |                   |  |
| A' sensitivity to target             | 0.9 (0.1)           | 0.93 (0.1)          | -0.70 | -1.30;-0.11 | <b>0.01</b>       |  |
| <b><u>Reaction time</u></b>          |                     |                     | -1.48 | -2.10;-0.85 | <b>&lt;0.0001</b> |  |
| <b>Reaction Time:</b>                |                     |                     |       |             |                   |  |
| Reaction <sup>log, ms</sup>          | 409.4 (264.9-988.6) | 330.0 (247.6-464.1) | -1.81 | -2.40;-1.22 | <b>&lt;0.0001</b> |  |
| Movement, <i>ms</i>                  | 417.8 (86.3)        | 338.3 (80.1)        | -0.84 | -1.43;-0.25 | <b>0.006</b>      |  |

Normally distributed raw-score variables are shown as mean (SD). Logarithmically transformed variables<sup>log</sup> are shown as arithmetic mean (range). Z-scores and test statistics are given in estimates from a linear mixed model adjusting for education and headache at time of testing and multiple testing. Significant p-values are printed in bold. <sup>a</sup>n=29, as Trail Making Test scores and Verbal Fluency scores from non-native Danish speakers (n=2) were omitted from analysis.

### **Clinical characteristics at follow-up**

In spite of several invitations to attend a follow-up examination two patients dropped out from baseline to follow-up. Clinical characteristics and baseline test-scores in these two patients did not differ from the rest of the patient group.

Twenty-nine patients were reexamined at the 3-month follow-up. One patient refused to have lumbar puncture performed at follow-up. A normalized ICP was found in 14 of the remaining 28 patients.

Less than half of the patients had headache during cognitive re-testing (Table 1). Visual fields were either stable or had improved from baseline.

Fourteen of 31 patients had resumed work/school, 11 patients were now on long-term sick-leave, one patient had reduced and altered work schedule due to IIH and two patients were unemployed.

### **Cognitive function at follow-up**

After 3-months of treatment statistical significant improvement was detected in two domains (Table 3). Attention scores (RVP A') had practically normalized while performance in visuospatial memory tests improved to a level above performance in healthy controls.

No overall change was detected in the domains of executive function, working memory, processing speed and reaction time (Figure 2). Patients in which ICP had normalized ( $<25$  cmH<sub>2</sub>O) did not perform better than patients in which elevated ICP persisted (ICP $>25$  cmH<sub>2</sub>O) and performance was not significantly associated with intensity or presence/absence of headache during the test. No correlation was found between change in cognitive performance and difference in ICP from baseline.



**Table 3. Cognitive test scores and composite domain scores at follow-up compared to baseline**

| Test Variables                              | Raw-scores        |                 | Z-scores and statistics |             |              |
|---------------------------------------------|-------------------|-----------------|-------------------------|-------------|--------------|
|                                             | IIH Baseline      | IIH Follow-up   | Z <sup>b</sup>          | 95% CL      | p            |
|                                             | n=31              | n=29            |                         |             |              |
| <b><u>Executive function</u></b>            |                   |                 | -0.18                   | -0.77;0.42  | 0.16         |
| <b>Intra-Extra Dimensional</b>              |                   |                 |                         |             |              |
| <b>Set Shift</b>                            |                   |                 |                         |             |              |
| ID/ED Errors <sup>log</sup>                 | 8.1 (0–32)        | 5.8 (1–32)      | -0.82                   | -1.40;-0.25 | 0.77         |
| Total errors adjusted <sup>log</sup> , s    | 20.9 (7–177)      | 14.4 (7–68)     | -0.56                   | -1.14;0.01  | 0.26         |
| <b>Stockings of Cambridge</b>               |                   |                 |                         |             |              |
| Solved in minimum moves                     | 9.61 (2.0)        | 19.9 (2.0)      | -0.08                   | -0.66;0.49  | 0.55         |
| Initial thinking time <sup>log</sup> , s    | 6.5 (2.0–18.3)    | 6.7 (2.5–18.4)  | 0.45                    | -0.14;1.02  | 0.98         |
| Subsequent thinking time <sup>log</sup> , s | 0.013 (0–3.7)     | 0.013 (0–3.7)   | 0.11                    | -0.47;0.68  | 0.85         |
| <b>Trail Making Test<sup>a</sup></b>        |                   |                 |                         |             |              |
| Trail Making B-A <sup>log</sup> , s         | 39.2 (14.7–101.1) | 33.1 (1.3–79.5) | 0.46                    | -0.12;1.05  | <b>0.002</b> |
| <b><u>Working memory</u></b>                |                   |                 | -0.33                   | -0.84;0.18  | 0.44         |
| <b>Spatial Working Memory</b>               |                   |                 |                         |             |              |
| Strategy score <sup>log</sup>               | 29.9 (20-42)      | 27.9 (19–42)    | -0.24                   | -0.81;0.34  | 0.10         |
| Total errors <sup>log</sup>                 | 10.2 (0–79)       | 10.1 (0–61)     | -0.24                   | -0.81;0.34  | 0.50         |
| <b>Spatial Span:</b>                        |                   |                 |                         |             |              |
| Span length                                 | 6.4 (1.3)         | 6.4 (1.3)       | -0.27                   | -0.85;0.31  | 0.96         |
| <b><u>Processing speed</u></b>              |                   |                 | -1.23                   | -1.83;-0.64 | 0.49         |
| <b>Verbal Fluency<sup>a</sup></b>           |                   |                 |                         |             |              |
| Letters                                     | 19.4 (7.0)        | 18.6 (6.6)      | -1.27                   | -1.86;-0.69 | 0.88         |
| Categories                                  | 39.8 (9.9)        | 42.5 (10.8)     | -0.93                   | -1.51;-0.34 | 0.41         |
| <b>Trail Making Test<sup>a</sup></b>        |                   |                 |                         |             |              |

|                                   |                     |                     |       |             |               |
|-----------------------------------|---------------------|---------------------|-------|-------------|---------------|
| Trail Making A <sup>log</sup> , s | 31.5 (18.0–68.1)    | 32.9 (9.8)          | -0.56 | -1.15;0.02  | 0.95          |
| Trail Making B <sup>log</sup> , s | 73.5 (40.9–169.2)   | 66.1 (38.7–125.4)   | -0.18 | -0.79;0.40  | 0.16          |
| <b>Symbol Digit Modalities</b>    |                     |                     |       |             |               |
| Correct symbols                   | 47.8 (10.2)         | 49.1 (12.3)         | -0.91 | -1.49;-0.33 | 0.50          |
| <b><u>Visuospatial memory</u></b> |                     |                     | 0.39  | -0.17;1.02  | <b>0.0005</b> |
| <b>Rey-Osterreith Figure</b>      |                     |                     |       |             |               |
| Immediate recall, score           | 24.5 (5.4)          | 28.9 (4.1)          | 0.36  | -0.22;0.93  | <b>0.002</b>  |
| Delayed recall, score             | 23.8 (5.0)          | 28.8 (3.8)          | 0.31  | -0.26;0.89  | <b>0.0002</b> |
| <b><u>Attention</u></b>           |                     |                     |       |             |               |
| <b>Rapid Visual Processing</b>    |                     |                     |       |             |               |
| A' sensitivity to target          | 0.9 (0.1)           | 0.92 (0.04)         | -0.14 | -0.71;0.43  | <b>0.03</b>   |
| <b><u>Reaction time</u></b>       |                     |                     | -1.31 | -1.90;-0.71 | 0.90          |
| <b>Reaction Time:</b>             |                     |                     |       |             |               |
| Reaction <sup>log</sup> , ms      | 409.4 (264.9–988.6) | 387.4 (393.0–710.1) | -1.45 | -2.02;-0.88 | 0.68          |
| Movement, ms                      | 417.8 (86.3)        | 412.3 (72.1)        | -0.89 | -1.46;-0.31 | 0.32          |

Normally distributed raw-score variables are shown as mean (SD). Logarithmically transformed variables<sup>log</sup> are shown as arithmetic mean (range). Z-scores and test statistics are given in estimates from a linear mixed model adjusting for education and headache at time of testing and multiple testing. Significant p-values are printed in bold. <sup>a</sup>n=29, as Trail Making Test scores and Verbal Fluency scores from non-native Danish speakers (n=2) were omitted from analysis. Z<sup>b</sup>: Patients at follow-up compared to healthy controls.

## DISCUSSION

This study is the first to comprehensively explore the cognitive functions in a cohort of more than 10 patients with IIH. We examined 31 patients and found deficits in four of six cognitive domains suggesting that IIH is associated with a global cognitive dysfunction.

Cognitive function in IIH has only been reported in three studies<sup>2-4</sup> in addition to a single case-report<sup>5</sup>. One study<sup>2</sup> examined 85 patients but applied only a single memory test and the methodology was not described in details. The remaining studies performed more extensive cognitive testing, but in contrast to our study were uncontrolled and included only respectively one, five and 10 patients<sup>3-5</sup>. Prior studies were, in addition, based on patients with a wide range of disease duration (6-98 months) and only one study<sup>3</sup> reported ICP at time of testing. Our study is the first to assessed the cognitive function in a well-defined group of patients with newly diagnosed disease (n=29) or relapse (n=2).

While the case-study of Kaplan et al.<sup>5</sup> found no convincing cognitive deficits, Arseni et al.<sup>2</sup> and Kharkar et al.<sup>4</sup> reported substantial deficits in memory. We found deficits in visuospatial memory and in spatial working memory strategy, but detected no overall difference in working memory. Verbal memory (measured by Wecheler Memory Scale) was by far the most affected parameter in the study of Kharkar et al. and similarly was reported moderate to severe in 90% of the patients studied by Arseni et al. Although we did not test verbal memory we found significant deficits in other verbal functions (verbal fluency). This is in line with the study of Sorensen et al.<sup>3</sup> reporting verbal deficits in all of their five patients. Deficits in phonological fluency, which were substantial in our patients, have been shown to relate to frontal lobe damage, reflecting an additional executive component.<sup>11</sup>

The most severe deficits in our study were found in the domains of reaction time and processing speed which is consistent with the study of Sorensen et al.<sup>3</sup> In addition we found significant

1  
2  
3  
4 impairment in cognitive flexibility. Cognitive flexibility is fundamental for effective decision-  
5  
6 making and the ability to learn and adapt to environmental changes, but has never been tested in  
7  
8 patients with IHH before.  
9

10 Although overall working memory was not affected in our study, patients did score significantly  
11  
12 worse in the working memory strategy. This may reflect an executive component consistent with  
13  
14 other executive deficits detected in our patients.  
15

16  
17 The deficits we detected in the domains of reaction time, processing speed, visuospatial memory and  
18  
19 attention were equivalent to those found in patients with first episode schizophrenia.<sup>12</sup> In addition  
20  
21 deficits in cognitive flexibility were similar to those (measured by Wisconsin Card Sort, a task  
22  
23 conceptionally akin to the Intra-Extra Dimensional Set Shift Test) found in a meta-analysis of  
24  
25 patients with schizophrenia in general.<sup>13</sup> Verbal fluency in our patients was affected to the same  
26  
27 extents as reported for patients with schizophrenia<sup>13</sup> as well as patients with congenital  
28  
29 hydrocephalus.<sup>11</sup> Furthermore deficits in verbal phonological fluency and processing speed  
30  
31 (measured by Symbol Digit Modalities Test) were in the range found in patients with multiple  
32  
33 sclerosis.<sup>14-16</sup>  
34  
35  
36

37 Despite marked improvement in ICP and headache we found no convincing signs of overall  
38  
39 cognitive improvement at the 3- month follow-up as the improvement seen in the visuospatial tests  
40  
41 could be explained by test-retest effect (familiarization with the Rey Osterieith Complex Figure).  
42  
43 Sorensen et al.<sup>3</sup> reported that although signs of cognitive dysfunction were only minor, four of their  
44  
45 five patients were unable to manage work and/or everyday activities. In our study 12 of the 31  
46  
47 patients were either on long-term sick-leave or had reduced and altered work schedule due to IHH at  
48  
49 follow-up three months after diagnosis. Short follow-up and co-existent headache-symptoms limit  
50  
51 the interpretation of the socioeconomic impact of cognitive dysfunction demonstrated in our study.  
52  
53  
54  
55  
56  
57  
58  
59  
60

1  
2  
3  
4 However, in other well recognized diseases such as schizophrenia a robust relationship between  
5 global and specific cognitive deficits and functional outcome has been consistently demonstrated.<sup>17,18</sup>  
6  
7

8 The cause of cognitive impairment in IHH remains speculative. Theories could involve dysfunction of  
9 grey and/or white matter substance due to mechanical compression as proposed in normal pressure  
10 hydrocephalus,<sup>11</sup> dysfunction related to axonal flow as in optic nerve swelling and dysfunction<sup>19</sup> or  
11 release of cytotoxic substances as is seen in other conditions with cognitive decline.<sup>20</sup> To date there is  
12 no plausible evidence for brain damage in IHH<sup>21</sup> and as brain volume seems to be normal in IHH<sup>22</sup> we  
13 would expect any structural change that could explain the cognitive deficits found in this study to be  
14 subtle.  
15  
16  
17  
18  
19  
20  
21  
22  
23

24 The strengths of the study is the prospective and controlled design, the broad range of cognitive tests,  
25 a relatively large study population, and the use of a culturally blind and computerized test battery that  
26 by automatic test conduction and score recording reduced the influence of the non-blinded observer.  
27  
28

29 In addition the study population was well defined with cognitive testing performed in close relation  
30 to IHH diagnosis and ICP measurement. As patients were enrolled consecutively from both  
31 neurological and ophthalmological departments our study population reflects representative IHH-  
32 patients and not a selected group of cognitively symptomatic patients.  
33  
34  
35  
36  
37  
38

39 We recognize limitations to our study. First, the design was the non-blinded design and we did not  
40 perform retest of healthy controls. Secondly, the follow-up period was relatively short and may very  
41 well explain why we, unlike others,<sup>3</sup> failed to demonstrate improvement in cognitive function. Most  
42 importantly, although we adjusted for many of the most important confounders, our controls were  
43 not matched for BMI, headache or history of depression. The effect of headache on cognitive  
44 function has been debated,<sup>23-25</sup> but a recent comprehensive review concluded that there is no  
45 evidence of cognitive dysfunction in patients with migraine in general.<sup>26</sup> On the other hand there  
46 seems to be evidence that *chronic* pain is associated with mild cognitive impairment in selected  
47  
48  
49  
50  
51  
52  
53  
54  
55  
56  
57  
58  
59  
60

1  
2  
3  
4 domains.<sup>27,28</sup> However, it is unclear if the cognitive impairment is attributed by the pain it self, or  
5  
6 more likely mediated by co-existent depression.<sup>29</sup> Headache was chronic in 10 (32%) of our patients  
7  
8 and depression was reported by eight (26%) patients. Neither depression nor chronic pain was  
9  
10 associated with poorer cognitive performance when compared within the patient group. BMI in our  
11  
12 patients ranged from normal to morbidly obese (24.2 – 48.8 kg/m<sup>2</sup>). Patients with higher BMI did not  
13  
14 perform worse than the less obese. Although it thus seems less likely that chronic pain, depression or  
15  
16 obesity account for our findings of impaired cognition, sub-analyses were limited by small sample  
17  
18 and statistical uncertainty. We acknowledge that to account for the influence of these potential  
19  
20 confounders we ideally should have included an additional control group of obese patients with  
21  
22 frequent headache. However, the wide range of factors potentially affecting performance in cognitive  
23  
24 tests, and the great variation within the patient group, makes an ideal match very difficult to achieve.  
25  
26 For future studies a feasible approach to this challenge could be to recruit subjects with suspected  
27  
28 IIH, but in which the diagnosis is declined after appropriate investigations.  
29  
30  
31

32  
33 In conclusions, this study strongly suggests that IIH is associated with cognitive deficits. The results  
34  
35 in addition indicate that the cognitive deficits are long-lasting, not paralleling ICP and headache  
36  
37 reduction, and are not sufficiently treated by diuretics and weight loss. Contrary to our hypothesis  
38  
39 executive and memory functions were only moderately affected. Nevertheless we found substantial  
40  
41 deficits in processing speed and reaction time which could explain some of the difficulties that  
42  
43 patients encounter in work and daily activities. A focused multidisciplinary approach including  
44  
45 neuropsychological rehabilitation therefore might be relevant in the treatment of patients with IIH.  
46  
47  
48  
49  
50  
51  
52  
53  
54  
55  
56  
57  
58  
59  
60

## AKNOWLEDGEMENTS

We thank Winnie G. Nielsen, BA; Lene Elkjær, BA and especially Hanne Andresen, BA for tireless effort and technical assistance during data collection (ICP measurements). We thank neuro-ophthalmologists Marianne Wegener, MD and Steffen Hamann, MD, PhD for thorough neuro-ophthalmological examination and evaluation supporting the diagnosis of IHH in our patients.

## COMPETING INTERESTS

H. Yri has received honoraria for consultant work from Neurocore and a travel grant from Berlin-Chemie Menarini. B. Fagerlund and H. Forchhammer report no disclosures. R. Jensen has received honoraria for lectures and patient leaflets from MSD, Berlin-Chemie Menarini, ATI and Pfizer and serves on medical advisory boards for LindeGas, ATI and Neurocore.

## FUNDING

This work was supported by “Region Hovedstadens Forskningsfond” and “Fonden til Lægevidenskabens Fremme”, grant number 12-375. The funding sources had no role in the study design; in the collection, analysis and interpretation data; in the writing of the report; or in the decision to submit the paper for publication.

## AUTHOR CONTRIBUTION

**HMY** made a substantive intellectual contribute to the design of the study, acquisition, analysis and interpretation of the data, and the drafting and revision of the manuscript.

**BF** made a substantive intellectual contribute to the design of the study, the interpretation of the data and the revision of the manuscript.

1  
2  
3  
4 **HBF** made a substantive intellectual contribute to the design of the study, the interpretation of the  
5  
6 data and the revision of the manuscript.  
7

8 **RHJ** made a substantive intellectual contribute to the conceptualization and design of the study, the  
9  
10 interpretation of the data and the revision of the manuscript.  
11

#### 12 13 14 15 **DATA SHARING STATEMENT**

16  
17 No additional data are available  
18  
19

#### 20 21 22 **EXCLUSIVE LICENCE**

23  
24 The Corresponding Author has the right to grant on behalf of all authors and does grant on behalf of  
25  
26 all authors, an exclusive licence (or non-exclusive for UK Crown Employees) on a worldwide basis  
27  
28 to the BMJ Publishing Group Ltd, and its Licensees to permit this article (if accepted) to be  
29  
30 published in BMJ Open and any other BMJ PGL products and to exploit all subsidiary rights, as set  
31  
32 out in our licence  
33  
34  
35  
36  
37  
38  
39  
40  
41  
42  
43  
44  
45  
46  
47  
48  
49  
50  
51  
52  
53  
54  
55  
56  
57  
58  
59  
60



## REFERENCES

1. Friesner D, Rosenman R, Lobb BM, Tanne E. Idiopathic intracranial hypertension in the USA: the role of obesity in establishing prevalence and healthcare costs. *Obes Rev* 2011;12:e372-e380.
2. Arseni C, Simoca I, Jipescu I, Leventi E, Grecu P, Sima A. Pseudotumor cerebri: risk factors, clinical course, prognostic criteria. *Rom J Neurol Psychiatry* 1992;30:115-132.
3. Sorensen PS, Thomsen AM, Gjerris F. Persistent disturbances of cognitive functions in patients with pseudotumor cerebri. *Acta Neurol Scand* 1986;73:264-268.
4. Kharkar S, Hernandez R, Batra S, Metellus P, Hillis A, Williams MA, Rigamonti D. Cognitive impairment in patients with Pseudotumor Cerebri Syndrome. *Behav Neurol* 2011;24:143-148.
5. Kaplan CP, Miner ME, McGregor JM. Pseudotumour cerebri: risk for cognitive impairment? *Brain Inj* 1997;11:293-303.
6. Friedman DI, Jacobson DM. Diagnostic criteria for idiopathic intracranial hypertension. *Neurology* 2002;59:1492-1495.
7. The International Classification of Headache Disorders, 3rd edition (beta version). *Cephalalgia* 2013;33:629-808.
8. Yri HM, Wegener M, Sander B, Jensen R. Idiopathic intracranial hypertension is not benign: a long-term outcome study. *J Neurol* 2012;259:886-894.

- 1  
2  
3  
4 9. Levaux MN, Potvin S, Sepehry AA, Sablier J, Mendrek A, Stip E. Computerized assessment of  
5  
6 cognition in schizophrenia: promises and pitfalls of CANTAB. *Eur Psychiatry* 2007;22:104-  
7  
8 115.  
9
- 10  
11 10. O'Carroll RE, Prentice N, Murray C, van BM, Ebmeier KP, Goodwin GM. Further evidence  
12  
13 that reading ability is not preserved in Alzheimer's disease. *Br J Psychiatry* 1995;167:659-662.  
14  
15
- 16  
17 11. Iddon JL, Pickard JD, Cross JJ, Griffiths PD, Czosnyka M, Sahakian BJ. Specific patterns of  
18  
19 cognitive impairment in patients with idiopathic normal pressure hydrocephalus and  
20  
21 Alzheimer's disease: a pilot study. *J Neurol Neurosurg Psychiatry* 1999;67:723-732.  
22  
23
- 24  
25 12. Andersen R, Fagerlund B, Rasmussen H, Ebdrup BH, Aggernaes B, Gade A, Oranje B,  
26  
27 Glenthøj B. Cognitive effects of six months of treatment with quetiapine in antipsychotic-naïve  
28  
29 first-episode schizophrenia. *Psychiatry Res* 2011;187:49-54.  
30  
31
- 32  
33 13. Heinrichs RW, Zakzanis KK. Neurocognitive deficit in schizophrenia: a quantitative review of  
34  
35 the evidence. *Neuropsychology* 1998;12:426-445.  
36  
37
- 38  
39 14. Foong J, Rozewicz L, Quaghebeur G, Davie CA, Kartsounis LD, Thompson AJ, Miller DH,  
40  
41 Ron MA. Executive function in multiple sclerosis. The role of frontal lobe pathology. *Brain*  
42  
43 1997;120 ( Pt 1):15-26.  
44
- 45  
46 15. Ruet A, Deloire MS, Charre-Morin J, Hamel D, Brochet B. A new computerised cognitive test  
47  
48 for the detection of information processing speed impairment in multiple sclerosis. *Mult Scler*  
49  
50 Published Online First: 4 Mar 2013. doi: 10.1177/1352458513480251.  
51  
52  
53  
54  
55  
56  
57  
58  
59  
60

- 1  
2  
3  
4 16. Lapshin H, Lanctot KL, O'Connor P, Feinstein A. Assessing the validity of a computer-  
5 generated cognitive screening instrument for patients with multiple sclerosis. *Mult Scler*  
6  
7  
8 Published Online First: 7 May 2013. doi: 10.1177/1352458513488841  
9  
10  
11  
12 17. Green MF, Kern RS, Braff DL, Mintz J. Neurocognitive deficits and functional outcome in  
13 schizophrenia: are we measuring the "right stuff"? *Schizophr Bull* 2000;26:119-136.  
14  
15  
16  
17 18. Jaeger J, Tatsuoka C, Berns S, Varadi F, Czobor P, Uzelac S. Associating functional recovery  
18 with neurocognitive profiles identified using partially ordered classification models. *Schizophr*  
19  
20  
21  
22  
23  
24 19. Tso MO, Hayreh SS. Optic disc edema in raised intracranial pressure. III. A pathologic study of  
25 experimental papilledema. *Arch Ophthalmol* 1977;95:1448-1457.  
26  
27  
28  
29  
30 20. Beeri MS, Moshier E, Schmeidler J, Godbold J, Uribarri J, Reddy S, Sano M, Grossman HT,  
31  
32  
33  
34  
35  
36  
37  
38  
39  
40  
41  
42  
43  
44  
45  
46  
47  
48  
49  
50  
51  
52  
53  
54  
55  
56  
57  
58  
59  
60
21. Wall M, Dollar JD, Sadun AA, Kardon R. Idiopathic intracranial hypertension. Lack of  
histologic evidence for cerebral edema. *Arch Neurol* 1995;52:141-145.
22. Hoffmann J, Huppertz HJ, Schmidt C, Kunte H, Harms L, Klingebiel R, Wiener E.  
Morphometric and volumetric MRI changes in idiopathic intracranial hypertension.  
*Cephalalgia* 2013.
23. Mulder EJ, Linssen WH, Passchier J, Orlebeke JF, de Geus EJ. Interictal and postictal  
cognitive changes in migraine. *Cephalalgia* 1999;19:557-565.

- 1  
2  
3  
4 24. Schmitz N, Arkink EB, Mulder M, Rubia K, Admiraal-Behloul F, Schoonman GG, Kruit MC,  
5  
6 Ferrari MD, van Buchem MA. Frontal lobe structure and executive function in migraine  
7  
8 patients. *Neurosci Lett* 2008;440:92-96.  
9  
10  
11 25. Le PF, Zappala G, Giuffrida S, Lo Bartolo ML, Reggio E, Morana R, Lanaia F. Memory  
12  
13 disturbances in migraine with and without aura: a strategy problem? *Cephalalgia* 2000;20:475-  
14  
15 478.  
16  
17  
18 26. Rist PM, Kurth T. Migraine and cognitive decline: a topical review. *Headache* 2013;53:589-  
19  
20 598.  
21  
22  
23 27. Block C, Cianfrini L. Neuropsychological and neuroanatomical sequelae of chronic non-  
24  
25 malignant pain and opioid analgesia. *NeuroRehabilitation* 2013;33:343-366.  
26  
27  
28 28. Moriarty O, McGuire BE, Finn DP. The effect of pain on cognitive function: a review of  
29  
30 clinical and preclinical research. *Prog Neurobiol* 2011;93:385-404.  
31  
32  
33 29. Brown SC, Glass JM, Park DC. The relationship of pain and depression to cognitive function in  
34  
35 rheumatoid arthritis patients. *Pain* 2002;96:279-284.  
36  
37  
38  
39  
40  
41  
42  
43  
44  
45  
46  
47  
48  
49  
50  
51  
52  
53  
54  
55  
56  
57  
58  
59  
60

## FIGURE TITLES AND LEGENDS

### Figur 1.

**Title:** Cognitive deficits in patients with IIH at time of diagnosis

**Legends:** Cognitive function in patients with IIH at time of diagnosis (n=31) shown in standard deviations from healthy controls (z-score). Error bars represent S.E.M. Colors indicate which domain the tests represent. \*p<0.05 \*\*p<0.005 \*\*\*p<0.0005.

### Figure 2.

**Title:** Cognitive deficits in patients with IIH at time of diagnosis and at follow-up

**Legends:** Changes in test performance from time of diagnosis to follow-up (n=29) in patients with IIH shown in standard deviations from healthy controls (z-score). Error bars represent S.E.M. \*p<0.05 \*\*p<0.005 \*\*\*p<0.001.

1  
2  
3  
4  
5  
6  
7  
8  
9  
10  
11  
12  
13  
14  
15  
16  
17  
18  
19  
20  
21  
22  
23  
24  
25  
26  
27  
28  
29  
30  
31  
32  
33  
34  
35  
36  
37  
38  
39  
40  
41  
42  
43  
44  
45  
46  
47  
48  
49  
50  
51  
52  
53  
54  
55  
56  
57  
58  
59  
60



258x169mm (300 x 300 DPI)

Review only

1  
2  
3  
4  
5  
6  
7  
8  
9  
10  
11  
12  
13  
14  
15  
16  
17  
18  
19  
20  
21  
22  
23  
24  
25  
26  
27  
28  
29  
30  
31  
32  
33  
34  
35  
36  
37  
38  
39  
40  
41  
42  
43  
44  
45  
46  
47  
48  
49  
50  
51  
52  
53  
54  
55  
56  
57  
58  
59  
60



258x169mm (300 x 300 DPI)

Review only

**Table 4. Differences in test performance between patients with and without chronic headache, patients with and without depression and the effect of BMI on test performance**

|                                          | Chronic headache <sup>a</sup> |            |      | Depression <sup>a</sup> |            |      | BMI <sup>b</sup> |            |                   |
|------------------------------------------|-------------------------------|------------|------|-------------------------|------------|------|------------------|------------|-------------------|
|                                          | estimate                      | 95% CI     | P    | estimate                | 95% CI     | P    | estimate         | 95% CI     | p                 |
| <b>Intra-Extra Dimensional Set Shift</b> |                               |            |      |                         |            |      |                  |            |                   |
| ID/ED Errors                             | -0.36                         | -1.26;0.54 | 0.43 | 0.05                    | -0.88;0.99 | 0.91 | -0.02            | -0.09;0.04 | 0.45              |
| Total errors adjusted                    | 0.09                          | -0.81;0.99 | 0.84 | -0.13                   | -1.07;0.80 | 0.77 | -0.01            | -0.07;0.06 | 0.88              |
| <b>Stockings of Cambridge</b>            |                               |            |      |                         |            |      |                  |            |                   |
| Solved in minimum moves                  | -0.10                         | -1.00;0.80 | 0.83 | -0.42                   | -1.36;0.52 | 0.38 | 0.07             | 0.01;0.14  | 0.03 <sup>c</sup> |
| Initial thinking time                    | 0.25                          | -0.65;1.15 | 0.59 | -0.32                   | -1.26;0.62 | 0.51 | 0.36             | -0.04;0.10 | 0.36              |
| Subsequent thinking time                 | 0.37                          | -0.53;1.27 | 0.42 | -0.14                   | -1.08;0.80 | 0.77 | 0.003            | -0.06;0.07 | 0.92              |
| <b>Trail Making Test<sup>a</sup></b>     |                               |            |      |                         |            |      |                  |            |                   |
| Trail Making B-A                         | 0.54                          | -0.39;1.46 | 0.25 | 0.52                    | -0.43;1.47 | 0.28 | -0.04            | -0.10;0.04 | 0.45              |
| <b>Spatial Working Memory</b>            |                               |            |      |                         |            |      |                  |            |                   |
| Strategy score                           | 0.31                          | -0.58;1.22 | 0.49 | 0.16                    | -0.78;1.09 | 0.74 | 0.02             | -0.04;0.09 | 0.50              |
| Total errors                             | 0.57                          | -0.33;1.47 | 0.21 | -0.07                   | -1.00;0.87 | 0.88 | 0.01             | -0.06;0.07 | 0.87              |
| <b>Spatial Span:</b>                     |                               |            |      |                         |            |      |                  |            |                   |
| Span length                              | -0.51                         | -1.41;0.39 | 0.26 | 0.46                    | -0.48;1.40 | 0.33 | -0.02            | -0.08;0.05 | 0.64              |
| <b>Verbal Fluency<sup>a</sup></b>        |                               |            |      |                         |            |      |                  |            |                   |
| Letters                                  | 0.95                          | 0.02;1.87  | 0.06 | 0.13                    | -0.82;1.08 | 0.78 | 0.01             | -0.06;0.08 | 0.71              |
| Categories                               | 0.20                          | -0.72;1.13 | 0.67 | -0.03                   | -0.98;0.92 | 0.95 | 0.003            | -0.07;0.07 | 0.92              |



**Trail Making Test<sup>a</sup>**

|                |      |            |      |       |            |      |       |            |      |
|----------------|------|------------|------|-------|------------|------|-------|------------|------|
| Trail Making A | 0.64 | -0.28;1.57 | 0.17 | -0.19 | -1.14;0.76 | 0.69 | 0.003 | -0.07;0.07 | 0.94 |
| Trail Making B | 0.71 | -0.21;1.64 | 0.13 | 0.33  | -0.61;1.28 | 0.49 | -0.02 | -0.09;0.04 | 0.51 |

**Symbol Digit Modalities**

|                 |      |            |      |      |            |      |      |            |      |
|-----------------|------|------------|------|------|------------|------|------|------------|------|
| Correct symbols | 0.36 | -0.54;1.26 | 0.43 | 0.28 | -0.66;1.22 | 0.56 | 0.02 | -0.05;0.08 | 0.61 |
|-----------------|------|------------|------|------|------------|------|------|------------|------|

**Rey-Osterreith Figure**

|                  |      |            |      |       |            |      |      |            |      |
|------------------|------|------------|------|-------|------------|------|------|------------|------|
| Immediate recall | 0.42 | -0.48;1.32 | 0.36 | -0.14 | -1.07;0.80 | 0.78 | 0.02 | -0.05;0.08 | 0.66 |
| Delayed recall   | 0.67 | -0.22;1.57 | 0.14 | -0.04 | -0.97;0.90 | 0.94 | 0.01 | -0.06;0.07 | 0.87 |

**Rapid Visual Processing**

|                          |      |            |      |       |            |      |      |            |      |
|--------------------------|------|------------|------|-------|------------|------|------|------------|------|
| A' sensitivity to target | 0.49 | -0.40;1.39 | 0.28 | -0.26 | -1.20;0.67 | 0.58 | 0.05 | -0.02;0.12 | 0.15 |
|--------------------------|------|------------|------|-------|------------|------|------|------------|------|

**Reaction Time:**

|          |      |            |      |      |            |      |       |            |      |
|----------|------|------------|------|------|------------|------|-------|------------|------|
| Reaction | 0.49 | -0.40;1.39 | 0.28 | 0.54 | -0.40;1.48 | 0.26 | 0.02  | -0.05;0.09 | 0.52 |
| Movement | 0.51 | -0.39;1.41 | 0.27 | 0.27 | -0.67;1.20 | 0.58 | -0.01 | -0.08;0.06 | 0.75 |

<sup>a</sup>Estimates are in SD and show difference between cognitive performance in patients without the dependent variable (depression and chronic headache) compared to patients with the variable. <sup>b</sup>Effect on test performance for every increasing BMI unit (kg/m<sup>2</sup>). <sup>c</sup>Patients with higher BMI performed better. There was no significant difference between patients and controls in this test (Table 2).

STROBE Statement—Checklist of items that should be included in reports of *case-control studies*

|                              | Item No | Recommendation                                                                                                                                                                                                                                                                                                                                                                                                                                                       |
|------------------------------|---------|----------------------------------------------------------------------------------------------------------------------------------------------------------------------------------------------------------------------------------------------------------------------------------------------------------------------------------------------------------------------------------------------------------------------------------------------------------------------|
| <b>Title and abstract</b>    | 1       | (a) Indicate the study's design with a commonly used term in the title or the abstract <a href="#">page 1</a><br>(b) Provide in the abstract an informative and balanced summary of what was done and what was found <a href="#">page 2</a>                                                                                                                                                                                                                          |
| <b>Introduction</b>          |         |                                                                                                                                                                                                                                                                                                                                                                                                                                                                      |
| Background/rationale         | 2       | Explain the scientific background and rationale for the investigation being reported <a href="#">page 4</a>                                                                                                                                                                                                                                                                                                                                                          |
| Objectives                   | 3       | State specific objectives, including any prespecified hypotheses <a href="#">page 4</a>                                                                                                                                                                                                                                                                                                                                                                              |
| <b>Methods</b>               |         |                                                                                                                                                                                                                                                                                                                                                                                                                                                                      |
| Study design                 | 4       | Present key elements of study design early in the paper <a href="#">page 4-5</a>                                                                                                                                                                                                                                                                                                                                                                                     |
| Setting                      | 5       | Describe the setting, locations, and relevant dates, including periods of recruitment, exposure, follow-up, and data collection <a href="#">page 4-5</a>                                                                                                                                                                                                                                                                                                             |
| Participants                 | 6       | (a) Give the eligibility criteria, and the sources and methods of case ascertainment and control selection. Give the rationale for the choice of cases and controls <a href="#">page 4-5</a><br>(b) For matched studies, give matching criteria and the number of controls per case <a href="#">page 4-5</a>                                                                                                                                                         |
| Variables                    | 7       | Clearly define all outcomes, exposures, predictors, potential confounders, and effect modifiers. Give diagnostic criteria, if applicable <a href="#">page 6-8</a>                                                                                                                                                                                                                                                                                                    |
| Data sources/<br>measurement | 8*      | For each variable of interest, give sources of data and details of methods of assessment (measurement). Describe comparability of assessment methods if there is more than one group <a href="#">page 6-7</a>                                                                                                                                                                                                                                                        |
| Bias                         | 9       | Describe any efforts to address potential sources of bias <a href="#">page 7-8</a>                                                                                                                                                                                                                                                                                                                                                                                   |
| Study size                   | 10      | Explain how the study size was arrived at <a href="#">page 4</a>                                                                                                                                                                                                                                                                                                                                                                                                     |
| Quantitative variables       | 11      | Explain how quantitative variables were handled in the analyses. If applicable, describe which groupings were chosen and why <a href="#">page 7-8</a>                                                                                                                                                                                                                                                                                                                |
| Statistical methods          | 12      | (a) Describe all statistical methods, including those used to control for confounding <a href="#">page 7-8</a><br>(b) Describe any methods used to examine subgroups and interactions <a href="#">page 7-8</a><br>(c) Explain how missing data were addressed <a href="#">page 7-8</a><br>(d) If applicable, explain how matching of cases and controls was addressed <a href="#">page 5</a><br>(e) Describe any sensitivity analyses <a href="#">not applicable</a> |
| <b>Results</b>               |         |                                                                                                                                                                                                                                                                                                                                                                                                                                                                      |
| Participants                 | 13*     | (a) Report numbers of individuals at each stage of study—eg numbers potentially eligible, examined for eligibility, confirmed eligible, included in the study, completing follow-up, and analysed <a href="#">page 10,14,15</a><br>(b) Give reasons for non-participation at each stage <a href="#">page 14</a><br>(c) Consider use of a flow diagram <a href="#">not applied</a>                                                                                    |
| Descriptive data             | 14*     | (a) Give characteristics of study participants (eg demographic, clinical, social) and information on exposures and potential confounders <a href="#">page 10-11</a><br>(b) Indicate number of participants with missing data for each variable of interest <a href="#">page 11,13,16</a>                                                                                                                                                                             |
| Outcome data                 | 15*     | Report numbers in each exposure category, or summary measures of exposure <a href="#">page 10,14,15</a>                                                                                                                                                                                                                                                                                                                                                              |
| Main results                 | 16      | (a) Give unadjusted estimates and, if applicable, confounder-adjusted estimates and                                                                                                                                                                                                                                                                                                                                                                                  |

their precision (eg, 95% confidence interval). Make clear which confounders were adjusted for and why they were included [page 10-16](#)

(b) Report category boundaries when continuous variables were categorized [page 10-11](#)

(c) If relevant, consider translating estimates of relative risk into absolute risk for a meaningful time period [not relevant](#)

Other analyses 17 Report other analyses done—eg analyses of subgroups and interactions, and sensitivity analyses [page 14](#)

### Discussion

Key results 18 Summarise key results with reference to study objectives [page 17-20](#)

Limitations 19 Discuss limitations of the study, taking into account sources of potential bias or imprecision. Discuss both direction and magnitude of any potential bias [page 19-20](#)

Interpretation 20 Give a cautious overall interpretation of results considering objectives, limitations, multiplicity of analyses, results from similar studies, and other relevant evidence [page 20](#)

Generalisability 21 Discuss the generalisability (external validity) of the study results [page 18-20](#)

### Other information

Funding 22 Give the source of funding and the role of the funders for the present study and, if applicable, for the original study on which the present article is based [page 21](#)

\*Give information separately for cases and controls.

**Note:** An Explanation and Elaboration article discusses each checklist item and gives methodological background and published examples of transparent reporting. The STROBE checklist is best used in conjunction with this article (freely available on the Web sites of PLoS Medicine at <http://www.plosmedicine.org/>, Annals of Internal Medicine at <http://www.annals.org/>, and Epidemiology at <http://www.epidem.com/>). Information on the STROBE Initiative is available at <http://www.strobe-statement.org>.
